# Supplementary material for: Multiplex CRISPR/Cas9-mediated knockout of the phytoene desaturase gene in Coffea canephora
Source: PubMed Central journal article supplement (PMC9568650; doi:10.1038/s41598-022-21566-w), 2022-10-14
Supplement: 41598_2022_21566_MOESM1_ESM.pdf [file 41598_2022_21566_MOESM1_ESM.pdf]

# Multiplex CRISPR/Cas9-mediated knockout of the *phytoene desaturase* gene in *Coffea canephora*

Tatiane Casarin<sup>1\*</sup>, Natália Chagas Freitas<sup>1</sup>, Renan Terassi Pinto<sup>1</sup>, Jean-Christophe Breitler<sup>2,3</sup>, Leonardo Augusto Zebral Rodrigues<sup>1</sup>, Pierre Marraccini<sup>2,3</sup>, Hervé Etienne<sup>2,3</sup>, Leandro Eugenio Cardamone Diniz<sup>4</sup>, Alan Carvalho Andrade<sup>5</sup>, Luciano Vilela Paiva<sup>1\*</sup>

<sup>1</sup> LCBM, UFLA, Lavras, 3037 Brazil;

<sup>2</sup> CIRAD, UMR DIADE, Montpellier, F-34398, France;

<sup>3</sup> UMR DIADE, University of Montpellier, CIRAD, IRD, Montpellier, F-34398, France.

<sup>4</sup> Embrapa Soybean, Londrina, 86085-981, Brazil;

<sup>5</sup> Embrapa Coffee - Inovacafé, Lavras, 3037, Brazil;

\*casarintatiane@gmail.com; luciano@ufla.br

## Supplementary Information

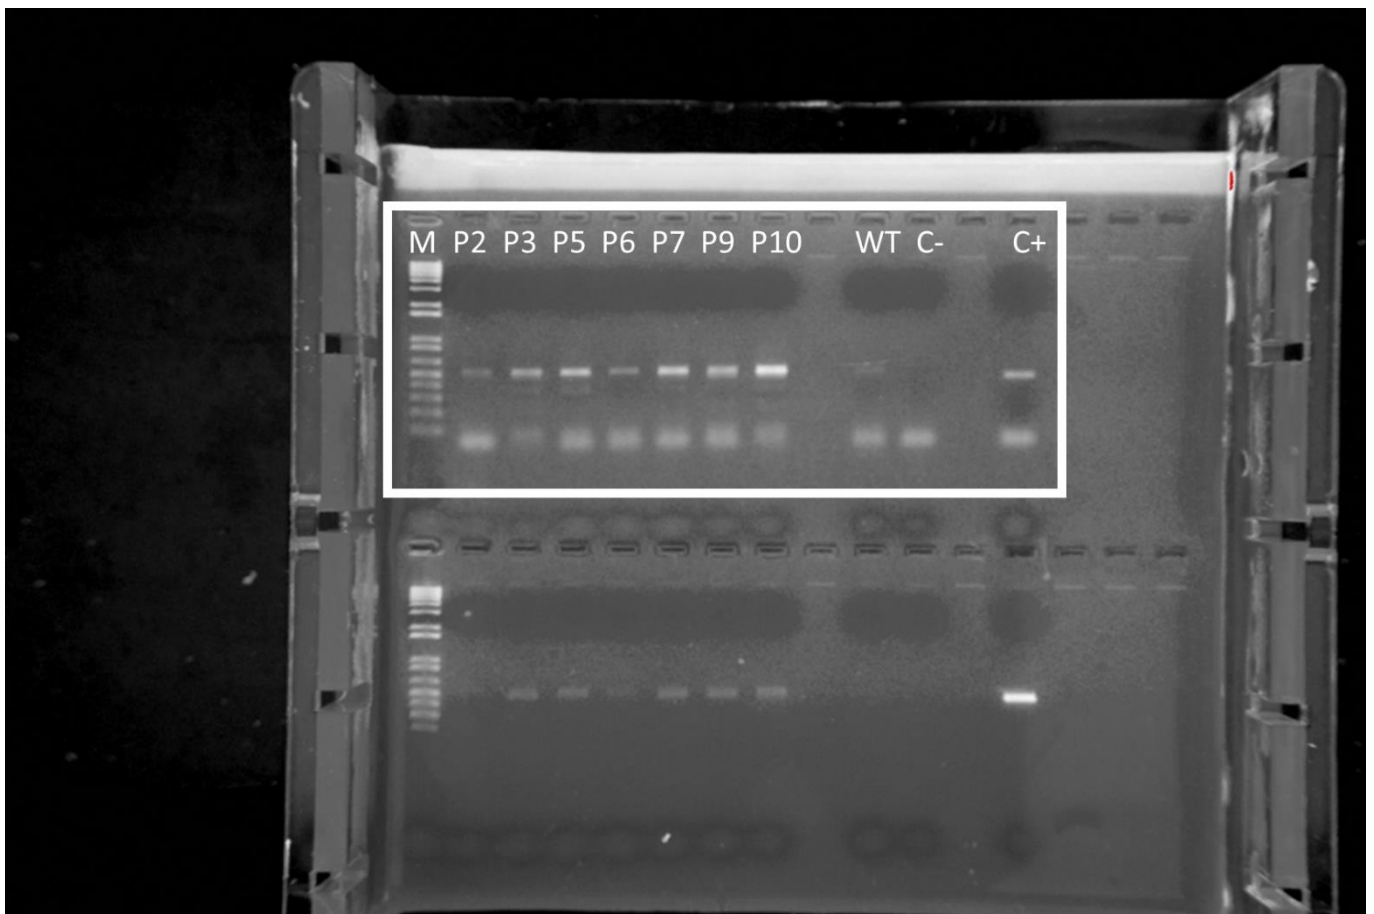

**Supplementary fig. S1.** Unprocessed image of the electrophoretic gel of the PCR to confirm the transformation of *C. canephora* albino seedlings with the pCOFEDIT-2 vector. In the area delimited by white lines, it is possible to observe

the following: M: molecular weight marker; P2-P10: transformed seedlings; WT: WT seedling; C-: negative control (water); C+: positive control (plasmid DNA).

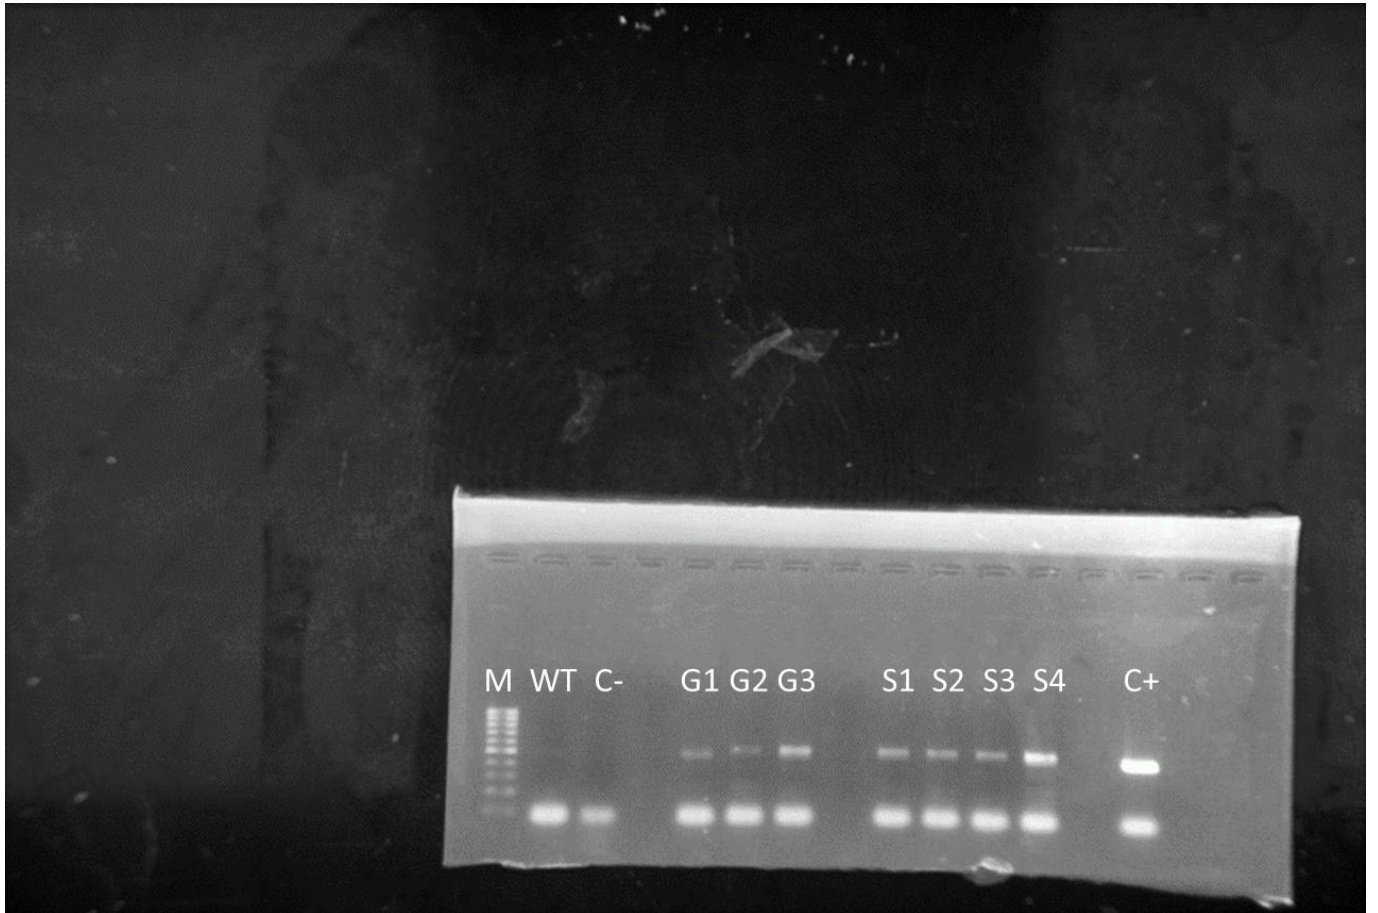

**Supplementary fig. S2.** Unprocessed image of the electrophoretic gel of the PCR to confirm the transformation of *C. canephora* green and variegated seedlings with the pCOFEDIT-2 vector. Legend: M: molecular weight marker; WT: WT seedling; C-: negative control (water); G1-G3: green seedlings; S1-S4: variegated seedlings; C+: positive control (plasmid DNA).

## Fasta sequences of the sequencing results used to analyze the mutations generated in the CcPDS gene.

**Supplementary dataset 1:** Partial genomic DNA sequencing of *CcPDS* corresponding to sgRNA target 1 (exon 3). Abbreviations refer to the following samples: P: albino somatic seedlings, WT: control, untransformed; G: green seedlings (transformed); S: variegated seedlings (transformed); and C: different clones sequenced.

>P2.C3

```
AGGSCCTKKKGKGRAAKKAAWTTTGGGGCTGTCTTATTTAGGAGTCTATCAGATGATTATCTGGTTTGCAAGACGGATCA
CTTTTATAGCTGATATTTTATATGTTTTAGCCTCCATTAGAACCTATGTTGTCTTATTTTGGTATTTTGCATAAATTT
GTATCATCGGATGTTATAAGTCAATTGCTTCTGAAAATAAGTCAAGGTATGACATACAGAACAAAGTCTGTTATGAAATA
AATTTCCACTTACTTGATTAAGTTTTATACTTTTCAGGTTTGGCTGGTTTGTCTACTGCAAAGTATTTGGCCGATGCAGGT
CATAAACCTATAGTGTGGAAAGCTAGGGATGTTCTGGGAGGAAAGGTAGCCAAATTATTACTCATTAGTGTTCATGAATT
CCTTGTGGCATAATGGACTGTGTCAAAGTTCAAGGAAAGTCTTTCAAATTTTCCAGTATATGGATGTGGGAGTTGGTCT
ATATGTGTGCAAATCGAATCCC CGCGCCGCCATGGCGGCGGGAGCATGCGACGTCGGGCCAATTCGCCCTATAGTGA
GTCGTATTACAATCACTGGCCGTCGTTTTACAACGTCGTGACTGGGAAAACCCTGGCGTTACCCAACCTAATCGCCTTG
CAGCACATCCCCCTTCGCCAGCTGGCGTAATAGCGAAGAGGCCCGCACCGATCGCCCTTCCCAACAGTTGCGCAGCCTG
AATGGCGAATGGACGCGCCCTGTAGCGGCGCATTAAAGCGCGGCGGGTGTGGTGGTTACGCGCAGCGTGACCGCTACACT
GCCAGCGCCCTAGCGCCCGCTCCTTTTCGCTTTCTTCCCTTCTTCTCGCCACGTTCCGCGGGCTTTCCCGGTMAGCTCTA
ATCGGGGGGCTCCCTTTAGGGTTCCGATTAGTGCCTTACGGCACTCGACCCCAAAAACCTTGAATTWRGGGGGKGAAT
GGGTTYTMSAASG
```

>P2.C4

```
GGGCTGTATGATTTGGGGTGCTTTTAGGATCTATCAATGTTTCTGGTTGCAACGGTCCTTTTAACTGTATTTAATGTTT
ACCTCCTTAAACTATGTGCTATTTGTATTTGCTAATTTGACTCGGTGTAATCATTGTTCTGAAAATCAGTTGCTAAAAA
ATCTGTTGAAAATTTCAATTATTGATATTTAATTTAGTTGGTGGTTGCATGAAKATTGGCGTGAGCTAACTAATGTGAACA
GGTGTGGAGAAGGACCATTATATCTTATGTCTATTCTGGCTATGATGGCAATTCAGGAATCTTCAATTTCAATTTGGTG
GGATTGGCAATTGGAATCAATCCC GGCCCTGCGCCGGACTCACTCGCCATCCCTAATGGCKATAATTATGGCTCTTAACT
CTGCGGAACCTGCTTCCATATCCCTGACCTCCTTCCACGCTAACAAAGCCCCACCCCTCACTCCCTGAGCATGCCCGAC
GCTACCGGGGGTCCCTGCCAATGACCCACCCCTCTTCTCTCCCTCCGTCCKASCACGCTAGCATAGTCGCCCA
ATAAGAGCKTGCCCAAGTCCTRTGCTTATATTCYAACCYKTTTAGTCTSTGARTATCTAAATRTCCSTCMGTASCTAAC
AAAAACTSTCAATACWCGMMSS
```

>P2.C5

```
GTKKRATRAWTTGGGGTKCTTTTAGGATCTATCAGTGTATCTGGTTGCAGACGGTCCTTTTAACTGTTTTAATGTT
TACCTCCTTAAACCTATGTGCTATTTTGGATTTGCTAAATGATCTCGGTGTTAATCATTGTTCTGAAAAATCAGTTGCT
AAAACAATCTGTTGAAAATTTCAATTATTGATATTTAACTTAGTTGGTGGTTGCATGAATATTGCCGTGAGCTAACTAATG
TGAACAGGTGTCTGGAGAAGGACCATTATATCTTATGTCTGATTCTTGGCTATGATGGCAATTCAGGAATCTTCAATTTT
CATAATGGTGGGATTGTCAATTGGAATCAATCCC GGCCCTGCGCCGGACTCACTCGCCATCCCTAATATCTATAATTAT
GGCTCTTAACTCTGCGGAACCTGCTTCCATATCCCTGACCTCCTTCCACGCTAACAAAGCCCCACCCCTCACTTCCCGTG
CATGCCCGACCCCTACCGGGGGTCCCTGCCAATGACCCACCCCTCTTCTCTCCCTCCGTCCKASYACGCCTAGCA
TTGTCGCCCAATGAGAGCKTGCCCAAGTYCCTRTGCTTAAAGCTAGAYCWCKTTTAGTCTSTKARTATCTAAAYTRYYGM
MGTGSCTAWCAAAAATTTAGCTTGARRR
```

>P2.C6

```
TGAACKAKCKATGATTTGGGGCTGTCTTATTTAGGAGTCTATCAGATGATTATCTGGTTTGCAAGACGGATCACTTTTT
ATAGCTGATATTTTATATGTTTTAGCCTCCATTAGAACCTATGTTGTCTTATTTTGGTATTTTGCATAAATTTGTATCA
TCGGATGTTATAAGTCAATTGCTTCTGAAAATAAGTCAAGGTATGACATACAGAACAAAGTCTGTTATGAAATAAATTT
CACTTACTTGATTAAGTTTTATACTTTTCAGGTTTGGCTGGTTTGTCTACTGCAAAGTATTTGGCCGATGCAGGTCATAAA
CCTATAGTGTGGAAAGCTAGGGATGTTCTGGGAGGAAAGGTAGCCAAATTATTACTCATTAGTGTTCATGAATTCCTTGT
GGCATAATGGACTGTGCCAAAGTTCAAGGAAAGTCTTTCAAATTTTCCAGTATATGGATGTGGGAGTTGGTCTATATGT
GTGCAAATCGAATCCC CGCGCCGCCATGGCGGCGGGAGCATGCGACGTCGGGCCAATTCGCCCTATAGTGAGTCGTA
TTACAATCACTGGCCGTCGTTTTACAACGTCGTGACTGGGAAAACCCTGGCGTTACCCAACCTAATCGCCTTGCAGCAC
ATCCCCCTTTCGCCAGCTGGCGTAATAGCGAAGAGGCCCGCACCGATCGCCCTTCCCAACAGTTGCGCAGCCTGAATGGC
GAATGGACGCGCCCTGTAGCGGCGCATTAAAGCGCGGCGGGTGTGGTGGTTACGCGCAGCGTGACCGCTACACTTGCCAGC
GCCCTAGCGCCCGCTCCTTTTCGCTTTCTTCCCTTCTTCTCGCCACGTTCCGCGGCTTTCCCGTCAGGCTCTAAATCG
GGGGGCTCCCGTTTAGGGATTTCCGAATTTTAGTKGCCTTTAACGGCMAC
```

>P3.C5

TGATGCAGTGATGATTTGGGGCTGTCTATTTAGGAGTCCTATCAGATGATTATCTGGTTTGCAAGACGGATCACTTTTT  
ATAGCTGATATTTATATGTTTTAGCCTCCATTAGAACCTATGTTGTCTTATTTTGGTATTTTGCATAAATTTGTATCA  
TCGGATGTTATAAGTCAATTGCTTCTGAAAATAAGTCAAGGTATGACATACAGAACAAGTCTGTTATGAAATAAATTC  
CACTTACTTGATTAAGTTTTATACTTTAGGTTTTGGCTGGTTTGTCTACTGCAAAGTATTTGGCCGATGCAGGTCATAAA  
CCTATAGTGTGGAAGCTAGGGATGTTCTGGGAGGAAAGGTAGCCAAATTACTCATTAGTGTTCATGAATTCCTTGT  
GGCATAATGGACTGTGTCAAAGTTCAAGGAAAGCTTTCAAATTTTCCAGTATATGGATGTGGGAGTTGGTCTATATGT  
GTGCAAATCGAATTCGCGCGCCGCCATGGCGGCCGGGAGCATGCGACGTCGGGCCAATTTCGCCCTATAGTGAGTCGTA  
TTACAATTCAGTGGCCGTCGTTTTACAACGTCGTGACTGGGAAAACCCTGGCGTTACCCAACCTAATCGCCTTGCAGCAC  
ATCCCCCTTCGCCAGCTGGCGTAATAGCGAAGAGGCCCGCACCGATCGCCCTTCCCAACAGTTGCGCAGCCTGAATGGC  
GAATGGACGCGCCCTGTAGCGGCGCATTAAAGCGCGGGGGTGTGGTGGTTACGCGCAGCGTGACCGCTACACTTGCCAGC  
GCCCTAGCGCCCGCTCCTTTCGCTTTCTCCTTCTTCTCGCCACGTTCCGCGGCTTCCCGTCAAGCTCTAATCGGGG  
TCCCTTAGGTTCCGATTTAGKGGCTTTACGGCCACCCTCCGAMCCCCCAGTATAC

>P3.C6

TCATGCAKCKATGATTTGGGGCTGTCTATTTAGGAGTCCTATCAGATGATTATCTGGTTTGCAAGACGGATCACTTTTT  
ATAGCTGATATTTATATGTTTTAGCCTCCATTAGAACCTATGTTGTCTTATTTTGGTATTTTGCATAAATTTGTATCA  
TCGGATGTTATAAGTCAATTGCTTCTGAAAATAAGTCAAGGTATGACATACAGAACAAGTCTGTTATGAAATAAATTC  
CACTTACTTGATTAAGTTTTATACTTTAGGTTTTGGCTGGTTTGTCTACTGCAAAGTATTTGGCCGATGCAGGTCATAAA  
CCTATAGTGTGGAAGCTAGGGATGTTCTGGGAGGAAAGGTAGCCAAATTACTCATTAGTGTTCATGAATTCCTTGT  
GGCATAATGGACTGTGTCAAAGTTCAAGGAAAGCTTTCAAATTTTCCAGTATATGGATGTGGGAGTTGGTCTATATGT  
GTGCAAATCGAATTCGCGCGCCGCCATGGCGGCCGGGAGCATGCGACGTCGGGCCAATTTCGCCCTATAGTGAGTCGTA  
TTACAATTCAGTGGCCGTCGTTTTACAACGTCGTGACTGGGAAAACCCTGGCGTTACCCAACCTAATCGCCTTGCAGCAC  
ATCCCCCTTCGCCAGCTGGCGTAATAGCGAAGAGGCCCGCACCGATCGCCCTTCCCAACAGTTGCGCAGCCTGAATGGC  
GAATGGACGCGCCCTGTAGCGGCGCATTAAAGCGCGGGGGTGTGGTGGTTACGCGCAGCGTGACCGCTACACTTGCCAGC  
CCCTAGCGCCCGCTCCTTTCGCTTTCTCCTTCTTCTCGCCACGTTCCGCGGCTTCCCGTCAAGCTCTAAATCG  
GGGGCTCCGTTAGGGGTTCCGATTAGTGCCTTACGGGCCACCCTTGAACYCCCAAACAAAA

>P3.C7

TRKGTGTGATGATTTGGGGTGTCTTTTAGGATCTATCAATGATATCTGGTTGCAGACGGTCTTTTTAACTGATTTAT  
ATGTTTACCTCCTTAAACCTATGTTGTCTTATTTTGGTATTTTGCATAAATTTGTATCATCGGATGTTATAAGTCAATT  
GCTTCTGAAAATAATCAAGGTATGACATACAGAACAATCTGTATGAATAAATTTCCACTTACTTGTTAATTTTATACTT  
TCAGTTGGTGGTTGCTACTGCAAATTTGGCGATGCAGTCTAAACCTATATGTGGAACCTAGGGTGTCTGGGAGGAAAG  
GACCAATTACTCTTATGTCTGATTCTTGTGCTATGATGTGCAATTCAGGAAATCTTCAATTTTATAATGGTGGGA  
TTGGCTTTTGAACAATCCCGCCCTGCGCCGACTCACTCGCCATCCCTAATATCKATAATTATGGCTCTTCACTCTG  
CGGAACCTGTACACTATCCCTGACCTCCCTCCACGCTAACAAAGCCCCACCCTCCAATGCACTGTGCAGGCCCGACGC  
TACCGGGGGTCCCKGCCAATGACCCACSCCTTCTTCTTCCMTCCGTCCKACYACGCCTAGCATTGTGCCCCAA  
TTAGAGCAGCCAAWTMCTATACTTAWAYCAMACCCMRTTAAG

>P3.C8

TAKKGCACKATGATTTGGGGCTGTCTATTTAGGAGTCCTATCAGATGATTATCTGGTTTGCAAGACGGATCACTTTTT  
ATAGCTGATATTTATATGTTTTAGCCTCCATTAGAACCTATGTTGTCTTATTTTGGTATTTTGCATAAATTTGTATCA  
TCGGATGTTATAAGTCAATTGCTTCTGAAAATAAGTCAAGGTATGACATACAGAACAAGTCTGTTATGAAATAAATTC  
CACTTACTTGATTAAGTTTTATACTTTAGGTTTTGGCTGGTTTGTCTACTGCAAAGTATTTGGCCGATGCAGGTCATAAA  
CCTATAGTGTGGAAGCTAGGGATGTTCTGGGAGGAAAGGTAGCCAAATTACTCATTAGTGTTCATGAATTCCTTGT  
GGCATAATGGACTGTGTCAAAGTTCAAGGAAAGCTTTCAAATTTTCCAGTATATGGATGTGGGAGTTGGTCTATATGT  
GTGCAAATCGAATTCGCGCGCCGCCATGGCGGCCGGGAGCATGCGACGTCGGGCCAATTTCGCCCTATAGTGAGTCGTA  
TTACAATTCAGTGGCCGTCGTTTTACAACGTCGTGACTGGGAAAACCCTGGCGTTACCCAACCTAATCGCCTTGCAGCAC  
ATCCCCCTTCGCCAGCTGGCGTAATAGCGAAGAGGCCCGCACCGATCGCCCTTCCCAACAGTTGCGCAGCCTGAATGGC  
GAATGGACGCGCCCTGTAGCGGCGCATTAAAGCGCGGGGGTGTGGTGGTTACGCGCAGCGTGACCGCTACACTTGCCAGC  
GCCCTAGCGCCCGCTCCTTTCGCTTTCTCCTTCTTCTCGCCACGTTCCGCGGCTTCCCGTCAAGCTCTAATCGG  
GGGGCTCCGTTAAGGTTTCCGATTTTAGTGCCTTTACGGGCMCCCCYCGACCCCCAGAAAA

>P6.C1

TKAWGGCTKKATGATTTGGGGCTGTCTATTTAGGAGTCCTATCAGATGATTATCTGGTTTGCAAGACGGATCACTTTTT  
ATAGCTGATATTTATATGTTTTAGCCTCCATTAGAACCTATGTTGTCTTATTTTGGTATTTTGCATAAATTTGTATCA  
TCGGATGTTATAAGTCAATTGCTTCTGAAAATAAGTCAAGGTATGACATACAGAACAAGTCTGTTATGAAATAAATTC  
CACTTACTTGATTAAGTTTTATACTTTAGGTTTTGGCTGGTTTGTCTACTGCAAAGTATTTGGCTGCAGGTCATAAACCT  
ATAGTGTGGAAGCTAGGGATGTTCTGGGAGGAAAGGTAGCCAAATTACTCATTAGTGTTCATGAATTCCTTGTGGC  
ATAATGGACTGTGCCAAAGTTCAAGGAAAGCTTTCAAATTTTCCAGTATATGGATGTGGGAGTTGGTCTATATGTGTG  
CAAATCGAATTCGCGCGCCGCCATGGCGGCCGGGAGCATGCGACGTCGGGCCAATTTCGCCCTATAGTGAGTCGTATTA  
CAATTCAGTGGCCGTCGTTTTACAACGTCGTGACTGGGAAAACCCTGGCGTTACCCAACCTAATCGCCTTGCAGCAMATC

CCCCTTTCGCCAGCTGGCGTAATAGCGAAGAGGCCCGCACCGATCGCCCTTCCCAACAGTTGCGCAGCCTGAATGGCGAA  
TGGACGCGCCCTGTARCGGCGCATTAAAGCGCGGGGGTGTGGTGGTTACGCGCAGCGTGACCGCTACACTTGCCAGCGC  
CCTAGCGCCCGCTCCTTTCGTTTTCTCCCTTCTTCTCGCCACGTTCCCGGCTTCCCGWMAGMTCWAATCAGGGGG  
GCTCCCMATAGGGTTCMGAATTTAGATGCCTTACGGSACMCCYTCTSAACCCCATAYAATAG

>P6.C2

TWRKKCKKCGKATGATTTGGGGCTGTCTATTTAGGAGTCTATCAGATGATTATCTGGTTTGCAAGACGGATCACTTT  
TTATAGCTGATATTTTATATGTTTTAGCCTCCATTAGAACCTATGTTGTCTATTTTGGTATTTTGCATAAAATTTGTAT  
CATCGGATGTTATAAGTCAATTGCTTCTGAAAATAAGTCAAGGTATGACATACAGAACAAGTCTGTTATGAAATAAAT  
TCCACTTACTTGATTAAGTTTTATACTTTACAGTTTGGCTGGTTTGTCTACTGCAAAGTATTTGGCCGATGCAGGTCATA  
AACCTATAGTGTGGAAGCTAGGGATGTTCTGGGAGGAAAGGTAGCCAAATTATTACTCATTAGTGTTCATGAATTCCTT  
GTGGCATAATGGACTGTGCCAAAGTTCAAGGAAAGTCTTTCAAATTTTCCAGTATATGGATGTGGGAGTTGGTCTATAT  
GTGTGCAAATCGAATTCGCGCGGCCCATGGCGGCCGGGAGCATGCGACGTGCGGCCCAATTCGCCCTATAGTGAGTCG  
TATTACAATTCAGTGGCCGTCGTTTTACAACGTCGTGACTGGGAAAACCTGGCGTTACCCAACCTAATCGCCTTGCAGC  
ACATCCCCCTTTCGCCAGCTGGGCGTAATAGCGAAASAGGCCCGCACCGATCGCCCTTCCCAACAGTTGCGCA

>P6.C3

TGAATGCATGCKATGATTTGGGGCTGTCTATTTAGGAGTCTATCAGATGATTATCTGGTTTGCAAGACGGATCACTTT  
TTATAGCTGATATTTTATATGTTTTAGCCTCCATTAGAACCTATGTTGTCTATTTTGGTATTTTGCATAAAATTTGTAT  
CATCGGATGTTATAAGTCAATTGCTTCTGAAAATAAGTCAAGGTATGACATACAGAACAAGTCTGTTATGAAATAAAT  
TCCACTTACTTGATTAAGTTTTATACTTTACAGTTTGGCTGGTTTGTCTACTGCAAAGTATTTGGCCGATGCAGGTCATA  
AACCTATAGTGTGGAAGCTAGGGATGTTCTGGGAGGAAAGGTAGCCAAATTATTACTCATTAGTGTTCATGAATTCCTT  
GTGGCATAATGGACTGTGCCAAAGTTCAAGGAAAGTCTTTCAAATTTTCCAGTATATGGATGTGGGAGTTGGTCTATAT  
GTGTGCAAATCGAATTCGCGCGGCCCATGGCGGCCGGGAGCATGCGACGTGCGGCCCAATTCGCCCTATAGTGAGTCG  
TATTACAATTCAGTGGCCGTCGTTTTACAACGTCGTGACTGGGAAAACCTGGCGTTACCCAACCTAATCGCCTTGCAGC  
ACATCCCCCTTTCGCCAGCTGGGCGTAATAGCGAAGAGGCCCGCACCGATCGCCCTTCCCAACAGTTGCGCAGCCTGAATG  
GCGAATGGACGCGCCCTGTAGCGGCGCATTAAAGCGCGGGGGTGTGGTGGTTACGCGCAGCGTGACCGCTACACTTGCCA  
GCGCCCTAGCGCCCGCTCCTTTCGTTTTCTTCTTCTTCTCGCACGTTCCCGGCTTCCCGTCAGCTCTAAATCGGGGG  
TCCTTAGGGTTCCGATTAGTGCTTTACCGGCCACCCTCGAACCCCAAAAAAAMTCT

>P6.C4

TKGAKGCTGCKATGATTTGGGGCTGTCTATTTAGGAGTCTATCAGATGATTATCTGGTTTGCAAGACGGATCACTTTT  
TATAGCTGATATTTTATATGTTTTAGCCTCCATTAGAACCTATGTTGTCTATTTTGGTATTTTGCATAAAATTTGTATC  
ATCGGATGTTATAAGTCAATTGCTTCTGAAAATAAGTCAAGGTATGACATACAGAACAAGTCTGTTATGAAATAAATTT  
CCACTTACTTGATTAAGTTTTATACTTTACAGTTTGGCTGGTTTGTCTACTGCAAAGTATTTGGCTGCAGGTCATAAACC  
TATAGTGTGGAAGCTAGGGATGTTCTGGGAGGAAAGGTAGCCAAATTATTACTCATTAGTGTTCATGAATTCCTTGTGG  
CATAATGGACTGTGTCAAAGTTCAAGGAAAGTCTTTCAAATTTTCCAGTATATGGATGTGGGAGTTGGTCTATATGTGT  
GCAAATCGAATTCGCGCGGCCCATGGCGGCCGGGAGCATGCGACGTGCGGCCCAATTCGCCCTATAGTGAGTCGATT  
ACAATTCAGTGGCCGTCGTTTTACAACGTCGTGACTGGGAAAACCTGGCGTTACCCAACCTAATCGCCTTGCAGCACAT  
CCCCCTTTCGCCAGCTGGGCGTAATAGCGAAGAGGCCCGCACCGATCGCCCTTCCCAACAGTTGCGCAGCCTGAATGGCGA  
ATGGACGCGCCCTGTAGCGGCGCATTAAAGCGCGGGGGTGTGGTGGTTACGCGCAGCGTGACCGCTACACTTGCCAGCGC  
CCTAGCGCCCGCTCCTTTCGTTTTCTTCTTCTTCTCGCACGTTCCCGGCTTCCCGTCAGCTCTAAATCGGGGGGT  
CCCTTAAAGTTCCGATTTAGTGCTTTTACGGCMCCCYTCSAAACMCCCCAAA

>P7.C1

TRAWKGCTKCKATGAATTTGGGGCTGTCTATTTAGGAGTCTATCAGATGATTATCTGGTTTGCAAGACGGATCACTTT  
TTATAGCTGATATTTTATATGTTTTAGCCTCCATTAGAACCTATGTTGTCTATTTTGGTATTTTGCATAAAATTTGTAT  
CATCGGATGTTATAAGTCAATTGCTTCTGAAAATAAGTCAAGGTATGACATACAGAACAAGTCTGTTATGAAATAAAT  
TCCACTTACTTGATTAAGTTTTATACTTTACAGTTTGGCTGGTTTGTCTACTGCAAAGTATTTGGCCGAGTGCAGGTCAT  
AAACCTATAGTGTGGAAGCTAGGGATGTTCTGGGAGGAAAGGTAGCCAAATTATTACTCATTAGTGTTCATGAATTCCT  
TGTGGCATAATGGACTGTGCCAAAGTTCAAGGAAAGTCTTTCAAATTTTCCAGTATATGGATGTGGGAGTTGGTCTATA  
TGTGTGCAAATCGAATTCGCGCGGCCCATGGCGGCCGGGAGCATGCGACGTGCGGCCCAATTCGCCCTATAGTGAGTC  
GTATTACAATTCAGTGGCCGTCGTTTTACAACGTCGTGACTGGGAAAACCTGGCGTTACCCAACCTAATCGCCTTGCAG  
CACATCCCCCTTTCGCCAGCTGGGCGTAATAGCGAAGAGGCCCGCACCGATCGCCCTTCCCAACAGTTGCGCAGCCTGAAT  
GGCGAATGGACGCGCCCTGTAGCGGCGCATTAAAGCGCGGGGGTGTGGTGGTTACGCGCAGCGTGACCGCTACACTTGCC  
AGCGCCCTAGCGCCCGCTCCTTTCGTTTTCTTCTTCTTCTCGCACGTTCCCGGCTTCCCGTCAGCTCTAATCGGG  
GCTCCTTAGGTTCCGATTTAGTGCTTTWTACCGGCACCTYCGAACCYCAAAAAAACT

>P7.C2

CKRARWWGCCTTKTGKAATGATTTGGGGCTGTCTATTTAGGAAGTCTATCAGATGAATTATCTGGTTTGCAAGACGG  
ATCMCTTTTTATAGCTGATATTTTATATGTTTTAGCCTCCATTAGAACCTATGTTGTCTATTTTGGTATTTTGCATAA  
ATTTGTATCATCGGATGTTATAAGTCAATTGCTTCTGAAAATAAGTCAAGGTATGACATACAGAACAAGTCTGTTATGA

AATAAATTTCCACTTACTTGATTAAGTTTTATACTTTTACAGGTTTGGCTGGTTTGTCTACTGCAAAGTATTTGGCCGAGTG  
CAGGTCATAAACCTATAGTGTGGAAGCTAGGGATGTTCTGGGAGGAAAGGTAGCCAAATTATTACTCATTAGTGTTCAT  
GAATTCCTTGTGGCATAATGGACTGTGCCAAAGTTCAAGGAAAGTCTTTCAAATTTTCCAGTATATGGATGTGGGAGTT  
GGTCTATATGTGTGCAAATCGAATTCGCCGCGCCGCCATGGCGGCCGGGAGCATGCGACGTGGGGCCCAATTCGCCTAT  
AGTGAGTCGTATTACAATTCAGTGGCCGTCGTTTTACAACGTCGTGACTGGGAAAACCTGGCGTTACCCAACCTTAATCG  
CCTTGACAGCACATCCCCCTTTCGCCAGCTGGGCGTAATAGCGAAGAGGCCCGCACCGATCGCCCTTCCCAACAGTTGCGC  
AGCCTGAATGGCGAATGGACGCGCCCTGTAGCGGCGCATTAAAGCGCGGGGTGTGGTGGTTACGCGCARCGGTGACCCG  
CTACAYTTGCCAGCGCCCTARSCGCCCGCTCTTTTCSYTTTCTTTT

>P7.C4

TGARWKGGGCTTGGTGAATGAATTTGGGGCTGTCTTATTTAGGAAGTCCATCAGATGATTATCTGGTTTGAAGACGGA  
TCACTTTTTATAGCTGATATTTTATATGTTTTAGCCTCCATTAGAACCTATGTTGTCTTATTTTGGTATTTTGTGATAAA  
TTTGTATCATCGGATGTTATAAGTCAATTGCTTCTGAAAATAAGTCAAGGTATGACATACAGAACAAGTCTGTTATGAA  
ATAAATTTCCACTTACTTGATTAAGTTTTATACTTTTACAGGTTTGGCTGGTTTGTCTACTGCAAAGTATTTGGCCGAGTGC  
AGGTCATAAACCTATAGTGTGGAAGCTAGGGATGTTCTGGGAGGAAAGGTAGCCAAATTATTACTCATTAGTGTTCATG  
AATTCCTTGTGGCATAATGGACTGTGCCAAAGTTCAAGGAAAGTCTTTCAAATTTTCCAGTATATGGATGTGGGAGTTG  
GTCTATATGTGTGCAAATCGAATTCGCCGCGCCGCCATGGCGGCCGGGAGCATGCGACGTGGGGCCCAATTCGCCCTATA  
GTGAGTCGTATTACAATTCAGTGGCCGTCGTTTTACAACGTCGTGACTGGGAAAACCTGGCGTTACCCAACCTTAATCGC  
CTTGACAGCACATCCCCCTTTCGCCAGCTGGGCGTAATAGCGAAGAGGCCCGCACCGATCGCCCTTCCCAACAGTTGCGCAG  
CCTGAATGGCGAATGGACGCGCCCTGTAGCGGCGCATTAAAGCGCGGGGTGTGGTGGTTACGCGCAGCGTGACCGCTAC  
ACTTGCCAGCGCCCTAGCGCCCGCTCCTTTTCTTTTCTCCCTTCTTTCTCGCACGTTTCGCCGGCTTTCCCGTACAGT  
CTAAATCGGGGGCTCCTTAGGGTTCGAATTAAGTGCCTTACGGCACCTCGACCCAAAAAATTGAATAAGGGKGAAGG  
GTTTCMACG

>P7.C5

AGWKWWGSCCTTGKGGATKGAATTTGGGGCTGTCTTATTTAGGAGTCCWATCAGATGATTATCTGGTTTGAAGACGGAT  
CMCTTTTTTATAGCTGATATTTTATATGTTTTAGCCTCCATTAGAACCTATGTTGTCTTATTTTGGTATTTTGTGATAAAT  
TTGTATCATCGGATGTTATAAGTCAATTGCTTCTGAAAATAAGTCAAGGTATGACATACAGAACAAGTCTGTTATGAAA  
TAAATTTCCACTTACTTGATTAAGTTTTATACTTTTACAGGTTTGGCTGGTTTGTCTACTGCAAAGTATTTGGCCGAGTGCA  
GGTCATAAACCTATAGTGTGGAAGCTAGGGATGTTCTGGGAGGAAAGGTAGCCAAATTATTACTCATTAGTGTTCATGA  
ATTCCTTGTGGCATAATGGACTGTGCCAAAGTTCAAGGAAAGTCTTTCAAATTTTCCAGTATATGGATGTGGGAGTTGG  
TCTATATGTGTGCAAATCGAATTCGCCGCGCCGCCATGGCGGCCGGGAGCATGCGACGTGGGGCCCAATTCGCCCTATAG  
TGAGTCGTATTACAATTCAGTGGCCGTCGTTTTACAACGTCGTGACTGGGAAAACCTGGCGTTACCCAACCTTAATCGCC  
TTGCAGCACATCCCCCTTTCGCCAGCTGGGCGTAATAGCGAAGAGGCCCGCACCGATCGCCCTTCCCAACAGTTGCGCAGC  
CTGAATGGCGAATGGACGCGCCCTGTAGCGGCGCATTAAAGCGCGGGGTGTGGTGGTTACGCGCAGCGTGACCGCTACA  
CTTGCCAGCGCCCTAGCGCCCGCTCCTWTTTCTTTTCTCCCTTCTTTCTYCGMCASATCGCCGGCTTTCCCGTCAAGC  
TCTAAATCGGGGGCTYCTTTTAGGGTTCGATTAGGTGCTTACGGGCACCTYCAACCCCTAAAACCTGTATAGGTTG  
AATGTTACGCATAGGTGGGCACACTGACGSACTMWG

>P10.C4

TGRRWWGGCCTGTGATGAATTTGGGGCTGTCTTATTTAGGAGTCCATCAGATGATTATCTGGTTTGAAGACGGATCAC  
TTTTTATAGCTGATATTTTATATGTTTTAGCCTCCATTAGAACCTATGTTGTCTTATTTTGGTATTTTGTGATAAATTTG  
TATCATCGGATGTTATAAGTCAATTGCTTCTGAAAATAAGTCAAGGTATGACATACAGAACAAGTCTGTTATGAAATAA  
ATTTCCACTTACTTGATTAAGTTTTATACTTTTACAGGTTTGGCTGGTTTGTCTACTGCAAAGTATTTGGCTGCAGGTCATA  
AACCTATAGTGTGGAAGCTAGGGATGTTCTGGGAGGAAAGGTAGCCAAATTATTACTCATTAGTGTTCATGAATTCCTT  
GTGGCATAATGGACTGTGTCAAAGTTCAAGGAAAGTCTTTCAAATTTTCCAGTATATGGATGTGGGAGTTGGTCTATAT  
GTGTGCAAATCGAATTCGCCGCGCCGCCATGGCGGCCGGGAGCATGCGACGTGGGGCCCAATTCGCCCTATAGTGAGTCG  
TATTACAATTCAGTGGCCGTCGTTTTACAACGTCGTGACTGGGAAAACCTGGCGTTACCCAACCTTAATCGCCTTGCAGC  
ACATCCCCCTTTCGCCAGCTGGGCGTAATAGCGAAGAGGCCCGCACCGATCGCCCTTCCCAACAGTTGCGCAGCCTGAATG  
GCGAATGGACGCGCCCTGTAGCGGCGCATTAAAGCGCGGGGTGTGGTGGTTACGCGCAGCGTGACCGCTACACTTGCCA  
GCGCCCTAGCGCCGCTCCTTTTCGCTTTCTCCCTTCTTTCTCGCCACGTTTCGCCGGGCTTTCCCGRTCAAGCTCTAAA  
TCGGGGGGCTCCTTTAAGGGTTCGGATTAGTGTCTACGGGCACCTCGACCCAAAAACCTTGGATTAAGGGGGKGGATGAT  
TTMCASGCTARGTTG

>P10.C5

GMGWRGWMYCTGGGKGAWGGATTTGGGGCTGTCTTATTTAGGAGTCCATCAGATGATTATCTGGTTTGAAGACGGAT  
CMCTTTTTTATAGCTGATATTTTATATGTTTTAGCCTCCATTAGAACCTATGTTGTCTTATTTTGGTATTTTGTGATAAAT  
TTGTATCATCGGATGTTATAAGTCAATTGCTTCTGAAAATAAGTCAAGGTATGACATACAGAACAAGTCTGTTATGAAA  
TAAATTTCCACTTACTTGATTAAGTTTTATACTTTTACAGGTTTGGCTGGTTTGTCTACTGCAAAGTATTTGTTTGCAGGTC  
ATAAACCTATAGTGTGGAAGCTAGGGATGTTCTGGGAGGAAAGGTAGCCAAATTATTACTCATTAGTGTTCATGAATTC  
CTTGTGGCATAATGGACTGTGCCAAAGTTCAAGGAAAGTCTTTCAAATTTTCCAGTATATGGATGTGGGAGTTGGTCTA

TATGTGTGCAAATCGAATTCCTCCGCGGCCGCGCCATGGCGGCCGGGAGCATGCGACGTGCGGCCCAATTCGCCCTATAGTGAG  
TCGTATTACAATTCAGTGGCCGTCGTTTTACAACGTCGTGACTGGGAAAACCTGGCGTTACCCAACCTAAATCGCCTTG  
CAGCACATCCCCCTTCGCGAGCTGGCGTAAWAGCRAAGAGGCCCGCACCGATCGCCCTCCCAACAGTTGCGCAGCCTG  
AATGGCGAATGGACGCGCCCTGTAGCGGGCGCATTAAAGCGCGCGGGTGTGGTGGTTACGCGCARSCGTGACCGCTACA  
CTTGCMAGCGCCCTAGCGSCCGCTCCTTCGCTTCTCCCTTCCTTCYSSCMCGTTMGCCGGCTTCCCCGTCAGCTC  
WAATCGGGGGGCGCYCTTARGGGTTTCGATTTRGCCTTACCGCCMCCCTCGAACCCCTAAAACACTGGACTTACGGCGTA  
AKGTGCTTYACAC

>P10.C6

CTTAATTTTTTAATAATGGTTTTAARCCTCATTAGAMMCTWTGTTGTCTTATTTTGGTATTTTGCATAAATTTGTA  
TCATCGGATGTTATAAGTCAATTGCTTCTGAAAATAAGTCMAGGTATGACATACARAACAAAGTCTGTTATGAAATAAAT  
TTCCACTTACTTGATTAAGTTTTATACTTTCAGGTTTGGCTGGTTGTCTACTGCAAAGTATTTGGCTGCAGGTCATAAA  
CCTATAGTGTGGAAGCTAGGGATGTTCTGGGARGAAAGGTAGCCAAATTACTCATTAGTGTTCATGAATTCCTTGT  
GGCATAATGGAYTGTGCCAAAGTTCAAGGAAAGYCTT

>P10.C7

CKRAKKKSSTKKKGATKGAATTTGGGGCTGTCTATTTAGGAGTCTATCAGATGATTATCTGGTTTGCAAGACGGATC  
ATTAWWWATAGCTGATTTTTATGTTTTAGCCTCCATTAGAACCTATGTTGTCTTATTTTGGTATTTTGCATAAAT  
TTGTATCATCGGATGTTATAAGTCAATTGCTTCTGAAAATAAGTCAAGGTATGACATACAGAACAAAGTCTGTTATGAAA  
TAAATTTCCACTTACTTGATTAAGTTTTATACTTTCAGGTTTGGCTGGTTGTCTACTGCAAAGTATTTGGCTGCAGGTC  
ATAAACCTATAGTGTGGAAGCTAGGGATGTTCTGGGAGGAAAGGTAGCCAAATTACTCATTAGTGTTCATGAATTC  
CTTGTGGCATAATGGACTGTGTCAAAGTTCAAGGAAAGTCTTTCAAATTTTCCAGTATATGGATGTGGGAGTTGGTCTA  
TATGTGTGCAAATCGAATTCCTCCGCGGCCGCGCCATGGCGGCCGGGAGCATGCGACGTGCGGCCCAATTCGCCCTATAGTGAG  
TCGTATTACAATTCAGTGGCCGTCGTTTTACAACGTCGTGACTGGGAAAACCTGGCGTTACCCAACCTAATCGCCTTGC  
AGCACATCCCCCTTCGCCAGCTGGCGTAATAKCGAAGAGGCCCGCACCGATCGCCCTTCCCAACAGTTGCCAGCCT  
GAATGGCAATGGACGCGCCCTGTAGCGGGCGCAWTTAAGCGCGGGGGTGGTGGTGGTTACGCGCAGCGTGACCGCTACAY  
TTG

>P5.C1

TRGGGGGGSCTGTYTYTWWTTTTAGGGAGTCTATCAGATGATTATCTGGTTTGCAAGACSSMTYWCTTTTATAGCT  
GATTTTTATATGTTTTAGCCTCCATYAGAACCTATGTTGTCTTATTTTGGTATTTTGCATAAATTTGATCATCGGAT  
GTTATAAGTCAATTGCTTCTGAAAATAAGTCAAGGTATGACATACAGAACAAAGTCTGTTATGAAATAAATTTCCACTTA  
CTTGATTAAGTTTTATACTTTCAGGGATGTTCTGGGAGGAAAGGTAGCCAAATTACTCATTAGTGTTCATGAATTC  
TTGTGGCATAATGGACTGTGTCAAAGTTCAAGGAAAGTCTTTCAAATTTTCCAGTATATGGATGTGGGAGTTGGTCTAT  
ATGTGTGCAAATCGAATTCCTCCGCGGCCGCGCCATGGCGGCCGGGAGCATGCGACGTGCGGCCCAATTCGCCCTATAGTGAGT  
CGTATTACAATTCAGTGGCCGTCGTTTTACAACGTCGTGACTGGGAAAACCTGGCGTTACCCAACCTAATCGCCTTGA  
GCACATCCCCCTTCGCCAGCTGGCGTAATAGCGAAGAGGCCCGCACCGATCGCCCTTCCCAACAGTTGCGCAGCCTGAA  
TGGCGAATGGACGCRCCCTGTAGCGGGCGCATTAAAGCGCGCGGGTGTGGTGGTTACGCGCAGCGTGACCGCTACACTTGT  
CAGCGCCCTAGCGCCGCTCCTTTCRCTTWCTTCCCTTCTCTCGMCACRATCGCCGGCTTCCCGTCAGCTCYAAAMC  
GGGGGCTCCCYTWAGGGTMCCSATTAGTGCTTTACKGCCWCTCGACCCCAWAAAACCTTGATT

>P5.C2

GWKGSMTKGGKMAWTGAWTTTTGGGGCTGTCTATTTAGGAGTCTATCAGATGATTATCTGGTTTGCAAGACGGATCAC  
TTTTTATAGCTGATTTTTATATGTTTTAGCCTCCATTAGAACCTATGTTGTCTTATTTTGGTATTTTGCATAAATTTG  
TATCATCGGATGTTATAAGTCAATTGCTTCTGAAAATAAGTCAAGGTATGACATACAGAACAAAGTCTGTTATGAAATAA  
ATTTCCACTTACTTGATTAAGTTTTATACTTTCAGGGATGTTCTGGGAGGAAAGGTAGCCAAATTACTCATTAGTGT  
TCATGAATTCCTTGTGGCATAATGGACTGTGTCAAAGTTCAAGGAAAGTCTTTCAAATTTTCCAGTATATGGATGTGGG  
AGTTGGTCTATATGTGTGCAAATCGAATTCCTCCGCGGCCGCGCCATGGCGGCCGGGAGCATGCGACGTGCGGCCCAATTCGCC  
CTATAGTGAGTCGTATTACAATTCAGTGGCCGTCGTTTTACAACGTCGTGACTGGGAAAACCTGGCGTTACCCAACCTA  
ATCGCCTTGCAGCACATCCCCCTTCGCCAGCTGGCGTAATAGCGAAGAGGCCCGCACCGATCGCCCTTCCCAACAGTTG  
CGCAGCCTGAATGGCGAATGGACGCGCCCTGTAGCGGGCGCATTAAAGCGCGGGGGTGTGGTGGTTACGCGCAGCGTGAC  
GCTACACTTGCAGCGCCCTAGCGCCGCTCCTTTCGCTTCTTCCCTTCTTCTCGCCACGTTGCGCGGCTTTCCTCCG  
TCAAGCTTAATCGGGGGCTCCCTTTAGGGTTCCGATTAGTGCTTACGGCACCTCGAMCCCAAAAACCTTGATAGGTGATG  
GTTACGATAGTGGGCCATCGCCCTGATAGACGGCTTTCGCCCTTGGACGTTGGARGTCCMSGATTCTTTAATWRGTGGG  
GAACT

>P5.C4

GMCYTTTGRITTCMTTATYTTTAGGGAAGTCTATCAGATGATTATCTGGTTTGCAAGACGGCATCWYTTTTTATAGCTG  
ATTTTTTATATGTTTTAGCCTCCATTMKAACCTATGTTGTCTTATTTTGGTATTTTGCATAAATTTGATCATCGGATG  
TTATAAGTCAATTGCTTCTGAAAATAAGTCAAGGTATGACATACAGAACAAAGTCTGTTATGAAATAAATTTCCACTTAC  
TTGATTAAGTTTTATACTTTCAGGGATGTTCTGGGAGGAAAGGTAGCCAAATTACTCATTAGTGTTCATGAATTCCT  
TGTGGCATAATGGACTGTGTCAAAGTTCAAGGAAAGTCTTTCAAATTTTCCAGTATATGGATGTGGGAGTTGGTCTATA

TGTGTGCAAATCGAATCCCGCGGCCGCCATGGCGGCCGGGAGCATGCGACSTCGGGCCCAATTCGCCCTATAGTGAGTC  
GTATTACAATTCAGTGGCCGTCGTTTTACAACSYCGTACTGGGAAAACCTGGCGTTACCCAACCTAATCGMCTTGAR  
ACATCCCCCTTCGCCAGCTGGCGTAATAGCGAAGAGGCCCGCACCGATCGCCCTCCCAACAGTTGCGCASCCTGAATG  
G

>WT1.C9

GKGTGTATGATTGGGTGCTATTAGGATCTATCAAGATTCTGTTGAACGTCCTTTTTAACTGTTTTTTGTTACCCCT  
TAAACCATGTGCTTATTTGTATTTGTCATAAATTTKATCATCGGATGTTATAAGTCAATTGCTTCTGAAAATAATCAA  
GGTATGACATACAAACAAATCTGTATGAATAAATTTCCCTTACTTGATAATTTATACTTTCAGTTGGTGGTTGCTACTG  
CAATATTGGCATGCAGCTAAACCTATATGTGAAGTGGGTGTCTGGAGAAAGGACCATTATATCTTATGTCTGATTCTTG  
GCTATGATGGCAATCAGAAGCTTAATTTATAATGGTGGGATTGTCAATTGGAACAATCCCGCCCTGCGCGACTCACT  
CGCCATCCAATGTCTTTCATATGGCTCTAACTCTGCGGAACCGCTACACTACCCTGACCTCCTCCACGCTAACAAAG  
CGACACCTCCAATCCCTGTGCATGCCCTGACCTACCCGTGGTACACKGCCAATGACCTACCCCTCCTCCTCCTCCCT  
CCGTCKACCACGCTAGCATTGTCGCCCAATGAGAGCTTGCCCAAGTCTATACTTATATTGACCTCKTTTAGTCTG  
TTAGAAAAAATRRTCMGTGCMGTGGCTTAACAATATCTTCATGTCAGTGCCTGCGYRG

>WT1.C2

GRRKGCTKKKKGWAATGATTTGGGGTGTCTTATTTAGGARTCTAATCAGATGATTATCTGGTTTGAAGACGGATCAC  
TTTTATAGCTGATATTTATATGTTTTAGCCTCCATTAGAACCTATGTTGTCTTATTTGGTATTTTGCATAAATTTG  
TATCATCGGATGTTATAAGTCAATTGCTTCTGAAAATAAGTCAAGGTATGACATACAGAACAAAGTCTGTTATGAAATA  
ATTTCCACTTACTTGATTAAGTTTTATACTTTCAGGTTTGGCTGTTTGTCTACTGCAAAGTATTTGGCCGATGCAGTGC  
ATAAACCTATAGTGTGGAAGCTAGGGATGTTCTGGGAGGAAAGGTAGCCAAATTACTCATTAGTGTTCATGAATTC  
CTTGTGGCATAATGGACTGTGTCAAAGTTCAAGGAAAGTCTTTCAAATTTTCCAGTATATGGATGTGGGAGTTGGTCTA  
TATGTGTGCAAATCGAATCCCGCGGCCGCCATGGCGGCCGGGAGCATGCGACGTCGGGCCCAATTCGCCCTATAGTGAG  
TCGATTACAATTCAGTGGCCGTCGTTTTACAACGTCGTACTGGGAAAACCTGGCGTTACCCAACCTAATCGCCTTGC  
AGCACATCCCCCTTCGCCAGCTGGCGTAATAGCGAAGAGGCCCGCACCGATCGCCCTCCCAACAGTTGCGCAGCCTGA  
ATGGCGAATGGACGCGCCTGTAGCGGCGCATTAAAGCGCGCGGGTGTGGTGTACGCGCAGCGTGACCGCTACACTTG  
CCAGCGCCCTAGCGCCGCTCCTTTCGCTTCTTCCCTTCTTCTCGCACGTTCCCGGCTTCCCGTCAAGCTCTAAT  
CGGGGCTCCTTAGGGTTCCGATTTAGTGCTTACCGCACCTCGACCCCAAAAACTTGATTTAGGGGGTGAATGGGTTCTM  
MRCGGTTAG

>WT1.C3

TRKKGGSCTKKKKRAWTGAATTTGGGGGCTGTCTTATTTAGGAGTCTATCAGATGATTATCTGGTTTGAAGACGGAT  
CACTTTTTATAGCTGATATTTATATGTTTTAGCCTCCATTAGAACCTATGTTGTCTTATTTGGTATTTTGCATAAAT  
TTGTATCATCGGATGTTATAAGTCAATTGCTTCTGAAAATAAGTCAAGGTATGACATACAGAACAAAGTCTGTTATGAAA  
TAAATTTCCACTTACTTGATTAAGTTTTATACTTTCAGGTTTGGCTGTTTGTCTACTGCAAAGTATTTGGCCGATGCAG  
GTCATAAACCTATAGTGTGGAAGCTAGGGATGTTCTGGGAGGAAAGGTAGCCAAATTACTCATTAGTGTTCATGAA  
TTCTTGTGGCATAATGGACTGTGTCAAAGTTCAAGGAAAGTCTTTCAAATTTTCCAGTATATGGATGTGGGAGTTGGT  
CTATATGTGTGCAAATCGAATCCCGCGGCCGCCATGGCGGCCGGGAGCATGCGACGTCGGGCCCAATTCGCCCTATAGT  
GAGTCGTATTACAATTCAGTGGCCGTCGTTTTACAACGTCGTACTGGGAAAACCTGGCGTTACCCAACCTAATCGCCT  
TGCAGCACATCCCCCTTCGCCAGCTGGCGTAATAGCGAAGAGGCCCGCACCGATCGCCCTCCCAACAGTTGCGCAGCC  
TGAATGGCGAATGGACGCGCCTGTAGCGGCGCATTAAAGCGCGCGGGTGTGGTGTACGCGCAGCGTGACCGCTACACT  
TTGCCAGCGCCCTAGCGCCGCTCCTTTCGCTTCTTCCCTTCTTCTCGCACGTTCCCGGCTTCCCGTCAAGCTCTAAT  
TAAATCGGGGGGCTCCCTTAAGTTTTGATTTAGTGCTTACCGCACCTCGACCCCAAAAACTTGATTTAGGGGGTGAAGK  
TGGTTTACCAG

>WT1.C4

CTCCMWTWATTTTWAGGGARGTCCCTATCAGATGATTATCTGGTTTGAAGACGGATCACTTTTTATAGCTGATATTT  
TATATGTTTTAGCCTCCATTAGAACCTATGTTGTCTTATTTGGTATTTTGCATAAATTTGTATCATCGGATGTTATA  
GTCAATTGCTTCTGAAAATAAGTCAAGGTATGACATACAGAACAAAGTCTGTTATGAAAATAAATTTCCACTTACTTGATT  
AAGTTTTATACTTTCAGGTTTGGCTGTTTGTCTACTGCAAAGTATTTGGCCGATGCAGGTCATAAACCTATAGTGTGG  
AAGCTAGGGATGTTCTGGGAGGAAAGGTAGCCAAATTACTCATTAGTGTTCATGAATTCCTTGTGGCATAATGGACT  
GTGTCAAAGTTCAAGGAAAGTCTTTCAAATTTTCCAGTATATGGATGTGGGAGTTGGTCTATATGTGTGCAAATCGAAT  
TCCCGCGGCCCATGGCGGCCGGGAGCATGCGACGTCGGGCCAATTCGCCCTATAGTGTGAGTCGTATTACAATTCAGT  
GCCGTCGTTTTACAACGTCGTACTGGGAAAACCTGGCGTTACCCAACCTAATCGCCTTGCAGCACATCCCCCTTTCG  
CAGCTGGCGTAATAGCGAAGAGGCCCGCACCGATCGCCCTCCCAACAGTTGCGCAGCCTGAATGGCGAATGGACGCGCC  
CTGTAGCGGCGCATTAAAGCGCGGCSGGGTGTGGTGTACGCGCAGCGTGACCGCTACACTTGCCAGCGCCCTAGCRGCC  
GCTCCTTTCGCTTCTTCCCTTCTTCTCGCMACGTTCCCGGCTTCCCGTCAAGCTCTAATCGGGGCTCCCTTAGG  
GTCCGAATTAGTGCTTACGGCAMCMTCGAMCCAAAACTGAATAGGGKRATGATCACGGTRRTGSGCCATYGCCCKG  
TAAMRGCA

>WT2.C1



GGSMTTKGRKAWTTTGGGGCTGTCTATTTAGGAGTCCTATCAGATGATTATCTGGTTTGCAAGACGGATCACTTTT  
TATARCTGATATTTTATATGTTTTAGCCTCCATTASAACCTATGTTGTCTATTTTGGTATTTTGCATAAAATTTGTATC  
ATCGGATGTTATAAGTCAATTGCTTCTGAAAATAAGTCAAGGTATGACATACASAACAAAGTCTGTTATGAAATAAATTT  
CCACTACTTGATTAAGTTTTATACTTTAGGTTTGGCTGGTTTGTCTACTGCAAAGTATTTGGCCGATGCAGGTCATAA  
MCCTATAGTGTGGAAGCTAGGGATGTTCTGGGAGGAAAGGTAGCCAAATTATTACTCATTAGTGTTCATGAATTCCTTG  
TGGCATAATGGACTGTGTCAAATTTCAAGGAAAGTCTTTCAAATTTTCCAGKATATGGATGTGGGAGTTGGTCTATATG  
TGTGCAAATCCMATTCCC GCGGCCCATGGCRGCCG

>WT2.C5

TGAWKGTGKATGATTTGGGGCTGTCTATTTAGGAGTCCTATCAGATGATTATCTGGTTTGCAAGACGGATCACTTTT  
TATAGCTGATATTTTATATGTTTTAGCCTCCATTAGAACCTATGTTGTCTATTTTGGTATTTTGCATAAAATTTGTATC  
ATCGGATGTTATAAGTCAATTGCTTCTGAAAATAAGTCAAGGTATGACATACAGAACAAAGTCTGTTATGAAATAAATTT  
CCACTACTTGATTAAGTTTTATACTTTAGGTTTGGCTGGTTTGTCTACTGCAAAGTATTTGGCCGATGCAGGTCATAA  
ACCTATAGTGTGGAAGCTAGGGATGTTCTGGGAGGAAAGGTAGCCAAATTATTACTCATTAGTGTTCATGAATTCCTTG  
TGGCATAATGGACTGTGTCAAAGTTCAAGGAAAGTCTTTCAAATTTTCCAGTATATGGATGTGGGAGTTGGTCTATATG  
TGTGCAAATCGAATTTCCGCGGCCCATGGCGGCCGGGAGCATGCGACGTGCGGCCCAATTCGCCCTATAGTGAGTCGT  
ATTACAATTCAGTGGCCGTCGTTTTACAACGTCGTGACTGGGAAAACCTGGCGTTACCCAATTAATCGCCTTGACGCA  
CATCCCCCTTTCCGAGCTGGCGTAATAGCGAAGAGGCCCGCACCGATCGCCCTCCCAACAGTTGCGCAGCCTGAATGG  
CGAATGGACGCGCCCTGTAGCGGCGCATTAAAGCGCGGGGTGTGGTGGTTACGCGCAGCGTGACCGTACACTTGCCAG  
CGCCCTAGCGCCGCTCCTTTGCTTTCTCCCTTCTTCTCGCACGTTGCGCGCTTTCCCGTCAAGCTCTAATCGG  
GGGCTCCTTAGGTTTCGATTTAGTGTCTTACCGCACTCGACCCAAAAAATTGATAGGGTATGGTTCMGGTTATGGCCATS  
ACCKTGTAWWTGAGARCAG

>WT2.C8

AMMMWMMGSRTRKCKGRAAKGRAWTTTGGGGGCTGTCTATTTAGGAGTCCTATCAGATGATTATCTGGTTTGCAAGACG  
GATCACTTTTATAGCTGATATTTTATATGTTTTAGCCTCCATTAGAACCTATGTTGTCTATTTTGGTATTTTGCATA  
AATTTGTATCATCGGATGTTATAAGTCAATTGCTTCTGAAAATAAGTCAAGGTATGACATACAGAACAAAGTCTGTTATG  
AAATAAATTTCCACTACTTGATTAAGTTTTATACTTTAGGTTTGGCTGGTTTGTCTACTGCAAAGTATTTGGCCGATG  
CAGGTCATAAACCTATAGTGTGGAAGCTAGGGATGTTCTGGGAGGAAAGGTAGCCAAATTATTACTCATTAGTGTTCAT  
GAATTCCTTGTTGATAATGGACTGTGTCAAAGTTCAAGGAAAGTCTTTCAAATTTTCCAGTATATGGATGTGGGAGTT  
GGTCTATATGTGTGCAAATCGAATTTCCGCGGCCCATGGCGGCCGGGAGCATGCGACGTGCGGCCCAATTCGCCCTAT  
AGTGAGTCGATTACAATTCAGTGGCCGTCGTTTTACAACGTCGTGACTGGGAAAACCTGGCGTTACCCAATTAATCG  
CCTTGACGACATCCCCCTTTCCGAGCTGGCGTAATAGCGAAGAGGCCCGCACCGATCGCCCTTYCCAACAGTTGCGC  
AGCCTGAATGGCAATGGACGCGCCCTGTAGCGGCGCATTAAAGCGCGGGGGTGTGGTGGTTACGCGCARCGTGACCGC  
TACACTTGMACGCGCCCTAGCSCCGCTCCTTTGCTTTCTCCCTTCTTCTCGCACGTTGCGCGGCTTTCCCGTCCARY  
TCTAATCGGGGGCTCCCTTAGGTTCCGATTTAGTGCTTACCGCACTCGACCCAAAAAATTGATAARGGGGWATGGCTT  
CWACRMKAGCC

>WT2.C9

TRATGGCCTGTGATGATTTGGGGCTGTCTATTTAGGAGTCCTATCAGATGATTATCTGGTTTGCAAGACGGATCACTTT  
TTATAGCTGATATTTTATATGTTTTAGCCTCCATTAGAACCTATGTTGTCTATTTTGGTATTTTGCATAAAATTTGTAT  
CATCGGATGTTATAAGTCAATTGCTTCTGAAAATAAGTCAAGGTATGACATACAGAACAAAGTCTGTTATGAAATAAAT  
TCCACTACTTGATTAAGTTTTATACTTTAGGTTTGGCTGGTTTGTCTACTGCAAAGTATTTGGCCGATGCAGGTCATA  
AACCTATAGTGTGGAAGCTAGGGATGTTCTGGGAGGAAAGGTAGCCAAATTATTACTCATTAGTGTTCATGAATTCCTT  
GTGGCATAATGGACTGTGTCAAAGTTCAAGGAAAGTCTTTCAAATTTTCCAGTATATGGATGTGGGAGTTGGTCTATAT  
GTGTGCAAATCGAATTTCCGCGGCCCATGGCGGCCGGGAGCATGCGACGTGCGGCCCAATTCGCCCTATAGTGAGTCG  
TATTACAATTCAGTGGCCGTCGTTTTACAACGTCGTGACTGGGAAAACCTGGCGTTACCCAATTAATCGCCTTGACG  
ACATCCCCCTTTCCGAGCTGGCGTAATAGCGAAGAGGCCCGCACCGATCGCCCTCCCAACAGTTGCGCAGCCTGAATG  
GCGAATGGACGCGCCCTGTAGCGGCGCATTAAAGCGCGGGGGTGTGGTGGTTACGCGCAGCGTGACCGTACACTTGCCA  
GCGCCCTAGCGCCGCTCCTTTGCTTTCTCCCTTCTTCTCGCACGTTGCGCGGCTTTCCCGTCAAGCTCTAATCG  
GGGGGCTCCCTTAGGTTCCGATTTAGTGCTTACGGCACTCGACCCAAAAAATTGATTAGGGTGAATGGATTACACSG  
TWGAGGKGGGG

>G1.C4

TAKGGCTKTGATGAATTTGGGGCTGTCTATTTAGGAGTCCTATCAGATGATTATCTGGTTTGCAAGACGGATCACTTT  
TTATAGCTGATATTTTATATGTTTTAGCCTCCATTASAACCTATGTTGTCTATTTTGGTATTTTGCATAAAATTTGTAT  
CATCGGATGTTATAAGTCAATTGCTTCTGAAAATAAGTCAAGGTATGACATACAGAACAAAGTCTGTTATGAAATAAAT  
TCCACTACTTGATTAAGTTTTATACTTTAGGTTTGGCTGGTTTGTCTACTGCAAAGTATTTGGCCGATGCAGGTCATA  
AACCTATAGTGTGGAAGCTAGGGATGTTCTGGGAGGAAAGGTAGCCAAATTATTATTCTTAKTGTTACGAAATTC  
>G1.C5

>G1.C5

CGKKGCTKGTGATGAATTTGGGGCTGTCTATTTAGGAGTCCTATCAGATGATTATCTGGTTTGCAAGACGGATCACTTT

TTATAGCTGATATTTTATATGTTTTAGCCTCCATTAGAACCTATGTTGTCTTATTTTGGTATTTTGCATAAAATTTGTAT  
CATCGGATGTTATAAGTCAATTGCTTCTGAAAATAAGTCAAGGTATGACATACAGAACAAAGTCTGTTATGAAATAAAT  
TCCACTTACTTGATTAAGTTTTATACTTTCAAGTTTGGCTGGTTTTGTCTACTGCAAAGTATTTGGCCGATGCAGGTCATA  
AACCTATAGTGTGGAAGCTAGGGATGTTCTGGGAGGAAAGGTAGCCAAATTATTACTCATTAGTGTTCATGAATTCCTT  
GTGGCATAATGGACTGTGCCAAAGTTC AAGGAAAGTCTTTCAAATTTTCCAGTATATGGATGTGGGAGTTGGTCTATAT  
GTGTGCAAATCGAATTCGCGCGGCCATGGCGGCCGGGAGCATGCGACGTCGGGCCCAATTCGCCCTATAGTGAGTCG  
TATTACAATTCAGTGGCCGTCGTTTTACAACGTCGTGACTGGGAAAACCCTGGCGTTACCCAACCTAATCGCCTTGACAGC  
ACATCCCCCTTTGCGCAGCTGGCGTAATAGCGAAGAGGCCCGCACCGATCGCCCTTCCCAACAGTTGCGCAGCCTGAATG  
GCGAATGGACGCGCCCTGTAGCGGCGCATTAAAGCGCGGGGGTGTGGTGGTTACGCGCAGCGTGACCGCTACACTTGCCA  
GCGCCCTAGCGCCGCTCCTTTGCTTTCTCCCTTCTCTTCTCGCMACGTTTCGCCGGCTTTCCCCGTCAAGCTCTAAW  
CGGGGGGCTCCCTTAGGTTCKATTTRTGCTTACCGCACTCGAACCCCAAAACTTGATTAGGGGTGATKGGTTCASSA  
TRCTGCGC

>G1.C7

TRWKGCTTGTGAATGAATTTGGGGCTGTCTTATTTAGGAGTCTATCAGATGATTATCTGGTTTGAAGACGGATCACT  
TTTTATAGCTGATATTTTATATGTTTTAGCCTCCATTAGAACCTATGTTGTCTTATTTTGGTATTTTGCATAAAATTTGT  
ATCATCGGATGTTATAAGTCAATTGCTTCTGAAAATAAGTCAAGGTATGACATACAGAACAAAGTCTGTTATGAAATAAA  
TTCCACTTACTTGATTAAGTTTTATACTTTCAAGTTTGGCTGGTTTTGTCTACTGCAAAGTATTTGGCCGATGCAGGTCA  
TAAACCTATAGTGTGGAAGCTAGGGATGTTCTGGGAGGAAAGGTAGCCAAATTATTACTCATTAGTGTTCATGAATTC  
TTGTGGCATAATGGACTGTGTCAAAGTTC AAGGAAAGTCTTTCAAATTTTCCAGTATATGGATGTGGGAGTTGGTCTAT  
ATGTGTGCAAATCGAATTCGCGCGGCCATGGCGGCCGGGAGCATGCGACGTCGGGCCCAATTCGCCCTATAGTGAGT  
CGTATTACAATTCAGTGGCCGTCGTTTTACAACGTCGTGACTGGGAAAACCCTGGCGTTACCCAACCTAATCGCCTTGCA  
GCACATCCCCCTTTGCGCAGCTGGCGTAATAGCGAAGAGGCCCGCACCGATCGCCCTTCCCAACAGTTGCGCAGCCTGAA  
TGGCGAATGGACGCGCCCTGTAGCGGCGCATTAAAGCGCGGGGGTGTGGTGGTTACGCGCAGCGTGACCGCTACACTTGC  
CAGCGCCCTAGCGCCGCTCCTTTGCTTTCTCCCTTCTCTTCTCGCCACGTTTCGCCGGCTTTCCCCGTCAAGCTCTAA  
TCGGGGGGCTCCCTTAGGTTGATTAGTGTACGGCACCTCGAACCCCAAAACTGATAGGTGATGTTACAGTTAGT  
GGGCCATTGCGCCCCCTGTGAATRTG

>G1.C9

TCKKGCCTKAKGAATGATTTGGGGCTGTCTTATTTAGGAGTCTATCAGATGATTATCTGGTTTGAAGACGGATCACTT  
TTTATAGCTGATATTTTATATGTTTTAGCCTCCATTAGAACCTATGTTGTCTTATTTTGGTATTTTGCATAAAATTTGTA  
TCATCGGATGTTATAAGTCAATTGCTTCTGAAAATAAGTCAAGGTATGACATACAGAACAAAGTCTGTTATGAAATAAA  
TTCCACTTACTTGATTAAGTTTTATACTTTCAAGTTTGGCTGGTTTTGTCTACTGCAAAGTATTTGGCCGATGCAGGTCAT  
AAACCTATAGTGTGGAAGCTAGGGATGTTCTGGGAGGAAAGGTAGCCAAATTATTACTCATTAGTGTTCATGAATTCCT  
TGTGGCATAATGGACTGTGTCAAAGTTC AAGGAAAGTCTTTCAAATTTTCCAGTATATGGATGTGGGAGTTGGTCTATA  
TGTGTGCAAATCGAATTCGCGCGGCCATGGCGGCCGGGAGCATGCGACGTCGGGCCCAATTCGCCCTATAGTGAGTC  
GTATTACAATTCAGTGGCCGTCGTTTTACAACGTCGTGACTGGGAAAACCCTGGCGTTACCCAACCTAATCGCCTTGCA  
CACATCCCCCTTTGCGCAGCTGGCGTAATAGCGAAGAGGCCCGCACCGATCGCCCTTCCCAACAGTTGCGCAGCCTGAAT  
GGCGAATGGACGCGCCCTGTAGCGGCGCATTAAAGCGCGGGGGTGTGGTGGTTACGCGCAGCGTGACCGCTACACTTGC  
AGCGCCCTAGCGCCGCTCCTTTGCTTTCTCCCTTCTCTTCTCGCACGTTTCGCCGGCTTTCCCCGTCAAGCTCTAATC  
GGGGGGCTCCTTAGGTCGATTAGTGTACCGCACTCGAACCCCAAAACTGATAGGTATGTCACGGTACTGGCCCATSG  
CCGTKGTATKTGTRC

>G2.C1

GRKGGCTKGTGAATGATTTGGGGCTGTCTTATTTAGGAGTCTATCAGATGATTATCTGGTTTGAAGACGGATCACTT  
TTATAGCTGATATTTTATATGTTTTAGCCTCCATTAGAACCTATGTTGTCTTATTTTGGTATTTTGCATAAAATTTGTAT  
CATCGGATGTTATAAGTCAATTGCTTCTGAAAATAAGTCAAGGTATGACATACAGAACAAAGTCTGTTATGAAATAAAT  
TCCACTTACTTGATTAAGTTTTATACTTTCAAGTTTGGCTGGTTTTGTCTACTGCAAAGTATTTGGCCGATGCAGGTCATA  
AACCTATAGTGTGGAAGCTAGGGATGTTCTGGGAGGAAAGGTAGCCAAATTATTACTCATTAGTGTTCATGAATTCCTT  
GTGGCATAATGGACTGTGCCAAAGTTC AAGGAAAGTCTTTCAAATTTTCCAGTATATGGATGAATCGAATTCGCGCGGC  
CGCCATGGCGGGCGGGAGCATGCGACGTCGGGCCCAATTCGCCCTATAGTGAGTCGATTACAATTCAGTGGCCGTCGTT  
TTACAACGTCGTGACTGGGAAAACCCTGGCGTTACCCAACCTAATCGCCTTGACAGCACATCCCCCTTTGCGCAGCTGGCG  
TAATAGCGAAGAGGCCCGCACCGATCGCCCTTCCCAACAGTTGCGCAGCCTGAATGGCGAATGGACGCGCCCTGTAGCGG  
CGCATTAAAGCGCGGGGGTGTGGTGGTTACGCGCAGCGTGMCCGCTACACTTGCCAGCGCCCTAGCGCCCGCTCCTTTG  
CTTTCTCCCTTCTTTTCTCYSGCCACGTTTCGCCGGCTTTCCCGTCAAGCTCTAAATCGGGGGCTCCTTTARGGTYCGATTA  
ATGCTTACGGCAMCCTCGAACCCCAAAAAACATGATAAGGTGAATGGTTCCASGTAKYGGACATGCCTGKATGACCGGCT  
TCTCGCCCTYGTGCARCGCTGKRGAGAACT

>G2.C4

AKRRKTGGCCTKKAATGAATTTGGGGCTGTCTTATTTAGGAGTCTATCAGATGATTATCTGGTTTGAAGACSGATCA  
CTTTTTATAGCTGATATTTTATATGTTTTAGCCTCCATTAGAACCTATGTTGTCTTATTTTGGTATTTTGCATAAAATTT

GTATCATCGGATGTTATAAGTCAATTGCTTCTGAAAATAAGTCAAGGTATGACATACAGAACAAAGTCTGTTATGAAATA  
AATTTCCACTTACTTGATTAAGTTTTATACTTTAGGTTTGGCTGGTTTGTCTACTGCAAAGTATTTGGCCGATGCAGGT  
CATAAACCTATAGTGTGGAAAGCTAGGGATGTTCTGGGAGGAAAGGTAGCCAAATTATTACTCATTAGTGTTCATGAATT  
CCTTGTGGCATAATGGACTGTGTCAAAGTTCAAGGAAAGTCTTTCAAATTTTCCAGTATATGGATGTGGGAGTTGGTCT  
ATATGTGTGCAAATCACTAGTGAATTCGCGGCCGCCTGCAGGTGACCATATGGGAGAGCTCCCAACGCGTTGGATGCAT  
AGCTTGAGTATTCTATAGTGTACCTAAATAGCTTGGCGTAATCATGGTCATAGCTGTTTCTGTGTGAAATTGTTATCC  
GCTCACAATTCACACAACATACGAGCCGGAAGCATAAAGTGTAAAGCCTGGGGTGCCTAATGAGTGAGCTAACTCACAT  
TAATTGCGTTGCGCTACTGCCCGCTTTCCAGTCGGGAAACCTGTCGTGCCAGCTGCATTAATGAATCGGCCAACGCGCG  
GGGAGAGGCGGTTTTCGTATTGGGCGCTCTTCCGCTTCTCGCTCACTGACTCSCTGCGCTSGGTGTTCCGGCTGCGCGA  
GCGGTATCAGCTCMMTYCAAGGCGGTAWWMCGTTATTCCACMGATCAGGGTATAACGCAGGAGAACATGTTGAGCAAGTC  
AGTCAAGGGCTMGGGATACCAGCSKATCG

>G2.C5

TGGARWGCCTTGTGATGATTTGGGGCTGTCTTATTTAGGAGTCCTATCAGATGATTATCTGGTTTGAAGACGGATCACT  
TTTTATAGCTGATATTTTATATGTTTTAGCCTCCATTAGAACCTATGTTGTCTTATTTTGGTATTTTGTCAAAAATTTGT  
ATCATCGGATGTTATAAGTCAATTGCTTCTGAAAATAAGTCAAGGTATGACATACAGAACAAAGTCTGTTATGAAATAAA  
TTTCCACTTACTTGATTAAGTTTTATACTTTAGGTTTGGCTGGTTTGTCTACTGCAAAGTATTTGGCCGATGCAGGTCA  
TAAACCTATAGTGTGGAAAGCTAGGGATGTTCTGGGAGGAAAGGTAGCCAAATTATTACTCATTAGTGTTCATGAATTC  
TTGTGGCATAATGGACTGTGCCAAAGTTCAAGGAAAGTCTTTCAAATTTTCCAGTATATGGATGTGGGAGTTGGTCTAT  
ATGTGTGCAAATCGAATTCGCGCGCCGCATGGCGGCCGGGAGCATGCGACGTGCGGCCAATTCGCCCTATAGTGAGT  
CGTATTACAATTCAGTGGCGTCTTTTTACAACGTCTGTACTGGGAAAACCTGGCGTTACCCAATTAATCGCCTTGCA  
GCACATCCCCCTTTCGCCAGCTGGCGTAATAGCGAAGAGGCCCGCACCGATCGCCCTTCCCAACAGTTGCGCAGCTGAA  
TGGCGAATGGACGCGCCCTGTAGCGGCGCATTAAAGCGCGCGGGTGTGGTGGTTACGCGCAGCGTGACCGCTACACTTGC  
CAGCGCCCTAGCGCCCGCTCTTTTCGCTTCTCCCTTCTTCTCGCACGTCSCCGCTTCCCCGTAAGCTCTAATCG  
GGGGCTCCCTTTAAGGGTCCGATTARGKGTACGCACCTCGACCCCAAAMCTKGATAGGCGTATGTTMGTATGGTC  
MMTTSGCCCTTGATGATATAGCACACATCG

>G2.C8

TCAKGGCCTTGTGATGAATTTGGGGCTGTCTTATTTAGGAGTCCTATCAGATGATTATCTGGTTTGAAGACGGATCACT  
TTTTATAGCTGATATTTTATATGTTTTAGCCTCCATTAGAACCTATGTTGTCTTATTTTGGTATTTTGTCAAAAATTTGT  
ATCATCGGATGTTATAAGTCAATTGCTTCTGAAAATAAGTCAAGGTATGACATACAGAACAAAGTCTGTTATGAAATAAA  
TTTCCACTTACTTGATTAAGTTTTATACTTTAGGTTTGGCTGGTTTGTCTACTGCAAAGTATTTGGCCGATGCAGGTCA  
TAAACCTATAGTGTGGAAAGCTAGGGATGTTCTGGGAGGAAAGGTAGCCAAATTATTACTCATTAGTGTTCATGAATTC  
TTGTGGCATAATGGACTGTGCCAAAGTTCAAGGAAAGTCTTTCAAATTTTCCAGTATATGGATGAATCGAATTCGCGC  
GCCGCCATGGCGGCCGGGAGCATGCGACGTGCGGCCAATTCGCCCTATAGTGAGTCGATTACAATTCAGTGGCCGTCG  
TTTTACAACGTCTGACTGGGAAAACCTGGCGTTACCCAATTAATCGCCTTGACGACATCCCCCTTTCGCCAGCTGG  
CGTAATAGCGAAGAGGCCCGCACCGATCGCCCTTCCCAACAGTTGCGCAGCTGAATGGCGAATGGACGCGCCCTGTAGC  
GGCGCATTAAAGCGCGCGGGTGTGGTGGTTACGCGCAGCGTGACCGCTACACTTGCCAGCGCCCTAGCGCCCGCTCCTT  
CGCTTCTTCCCTTCTTCTCGCCACGTTCCGCCGCTTCCCGTCAGCTCTAAATCGGGGGCTCCCTTAGGGTTCGAT  
TAGTGCTTACGGCACTCGACCCAAAACCTTGATAGGTGAATGTTTACGTATGGCATCGACTGATGAACGGTTTTTYGGC  
GCCCCCTCTTGTG

>G3.C2

TGRKKGCTGKATGAATTTGGGGCTGTCTTATTTAGGAGTCCTATCAGATGATTATCTGGTTTGAAGACGGATCACT  
TTTTATAGCTGATATTTTATATGTTTTAGCCTCCATTAGAACCTATGTTGTCTTATTTTGGTATTTTGTCAAAAATTTGT  
ATCATCGGATGTTATAAGTCAATTGCTTCTGAAAATAAGTCAAGGTATGACATACAGAACAAAGTCTGTTATGAAATAAA  
TTTCCACTTACTTGATTAAGTTTTATACTTTAGGTTTGGCTGGTTTGTCTACTGCAAAGTATTTGGCCGATGCAGGTCA  
TAAACCTATAGTGTGGAAAGCTAGGGATGTTCTGGGAGGAAAGGTAGCCAAATTATTACTCATTAGTGTTCATGAATTC  
TTGTGGCATAATGGACTGTGTCAAAGTTCAAGGAAAGTCTTTCAAATTTTCCAGTATATGGATGTGGGAGTTGGTCTAT  
ATGTGTGCAAATCGAATTCGCGCGCCGCATGGCGGCCGGGAGCATGCGACGTGCGGCCAATTCGCCCTATAGTGAGT  
CGTATTACAATTCAGTGGCGTCTTTTTACAACGTCTGTACTGGGAAAACCTGGCGTTACCCAATTAATCGCCTTGCA  
GCACATCCCCCTTTCGCCAGCTGGCGTAATAGCGAAGAGGCCCGCACCGATCGCCCTTCCCAACAGTTGCGCAGCTGAA  
TGGCGAATGGACGCGCCCTGTAGCGGCGCATTAAAGCGCGCGGGTGTGGTGGTTACGCGCAGCGTGACCGCTACACTTGC  
CAGCGCCCTAGCGCCCGCTCTTTCGCTTCTTCTTCTTCTCGCACGTTCCGCCGCTTCCCCGTAAGCTCTAATC  
GGGGCTCCTTAGGGTCCGAATTAGTGCTTACGCACCTCGACCCAAAACCTGAATTAGGGTGAATGGGTTYAMGCG  
TAKGTGGGGGCACACTAYG

>G3.C3

TTKKGCTTKKGAATKAATTTGGGGCTGTCTTATTTAGGAGTCCTATCAGATGATTATCTGGTTTGAAGACGGATCACT  
TTTTATAGCTGATATTTTATATGTTTTAGCCTCCATTAGAACCTATGTTGTCTTATTTTGGTATTTTGTCAAAAATTTGT  
ATCATCGGATGTTATAAGTCAATTGCTTCTGAAAATAAGTCAAGGTATGACATACAGAACAAAGTCTGTTATGAAATAAA

TTTCCACTTACTTGATTAAGTTTTATACTTTAGGTTTGGCTGGTTTGTCTACTGCAAAGTATTTGGCCGATGCAGGTCA  
TAAACCTATAGTGTGGGAAGCTAGGGATGTTCTGGGAGGAAAGGTAGCCAAATTACTCATTAGTGTTCATGAATTC  
TTGTGGCATAATGGACTGTGTCAAAGTTCAAGGAAAGTCTTTCAAATTTTCCAGTATATGGATGTGGGAGTTGGTCTAT  
ATGTGTGCAAATCGAATTCGCGCGCCGCATGGCGGCCGGGAGCATGCGACGTCGGGCCCAATTCGCCCTATAGTGAGT  
CGTATTACAATTCAGTGGCCGTCGTTTTACAACGTCGTGACTGGGAAAACCTGGCGTTACCCAACCTTAATCGCCTTGC  
AGMACATCCCCCTTTCGCCAGCTGGCGTAAATAGCGAAGAGGCCCGCACCGATCGCCCTCCCAACAGTTGCGCASCCTG  
AAATGGCGAATGGACGCGCCCTGTAGCGGCGCATTAAAGCGCGGGGTGTGGTGGTTACGCGCAGCGTGACCSYTACAC  
>G3.C4

TGRKGGSATGKGATGAAATTTGGGGCTGTCTATTTAGGAGTCTATCAGATGATTATCTGGTTTGAAGACGGATCACT  
TTTTATAGCTGATATTTATATGTTTTAGCCTCCATTAGAACCTATGTTGTCTTATTTGGTATTTTGCATAAATTTGT  
ATCATCGGATGTTATAAGTCAATTGCTTCTGAAAATAAGTCAAGGTATGACATACAGAACAAAGTCTGTTATGAAATAAA  
TTTCCACTTACTTGATTAAGTTTTATACTTTAGGTTTGGCTGGTTTGTCTACTGCAAAGTATTTGGCCGATGCAGGTCA  
TAAACCTATAGTGTGGGAAGCTAGGGATGTTCTGGGAGGAAAGGTAGCCAAATTACTCATTAGTGTTCATGAATTC  
TTGTGGCATAATGGACTGTGTCAAAGTTCAAGGAAAGTCTTTCAAATTTTCCAGTATATGGATGTGGGAGTTGGTCTAT  
ATGTGTGCAAATCGAATTCGCGCGCCGCATGGCGGCCGGGAGCATGCGACGTCGGGCCCAATTCGCCCTATAGTGAGT  
CGTATTACAATTCAGTGGCCGTCGTTTTACAACGTCGTGACTGGGAAAACCTGGCGTTACCCAACCTTAATCGCCTTGC  
GCACATCCCCCTTTCGCCAGCTGGCGTAAATAGCGAAGAGGCCCGCACCGATCGCCCTCCCAACAGTTGCGCAGCCTGAA  
TGGCGAATGGACGCGCCCTGTAGCGGCGCATTAAAGCGCGGGGGTGTGGTGGTTACGCGCAGCGTGACCGCTACACT  
TGCCAGCGCCCTAGCGCCGCTCCTTTCGTTTTCTCCCTTCTWTCTCGCACGTTTCGCCGGCTTTCCCGTCAAGCTCTA  
ATCGGGGGGCTCCCTTARGGGTTCCGAATRTGCTTTACGGCACCTCGCAACCCTAATACTGAATACGGKCAATGTCAC  
GTAGKGGGCCCTACTSSACCMSATGTATSAT  
>G3.C5

TGGKKGCTTGKGAATGAATTTGGGGCTGTCTATTTAGGAGTCTATCAGATGATTATCTGGTTTGAAGACGGATCAC  
TTTTATAGCTGATATTTATATGTTTTAGCCTCCATTAGAACCTATGTTGTCTTATTTGGTATTTTGCATAAATTTG  
TATCATCGGATGTTATAAGTCAATTGCTTCTGAAAATAAGTCAAGGTATGACATACAGAACAAAGTCTGTTATGAAATAA  
ATTTCCACTTACTTGATTAAGTTTTATACTTTAGGTTTGGCTGGTTTGTCTACTGCAAAGTATTTGGCCGATGCAGGTC  
ATAAACCTATAGTGTGGGAAGCTAGGGATGTTCTGGGAGGAAAGGTAGCCAAATTACTCATTAGTGTTCATGAATTC  
CTTGTGGCATAATGGACTGTGTCAAAGTTCAAGGAAAGTCTTTCAAATTTTCCAGTATATGGATGTGGGAGTTGGTCTA  
TATGTGTGCAAATCGAATTCGCGCGCCGCATGGCGGCCGGGAGCATGCGACGTCGGGCCCAATTCGCCCTATAGTGAG  
TCGTATTACAATTCAGTGGCCGTCGTTTTACAACGTCGTGACTGGGAAAACCTGGCGTTACCCAACCTTAATCGCCTTGC  
AGCACATCCCCCTTTCGCCAGCTGGCGTAAATAGCGAAGAGGCCCGCACCGATCGCCCTCCCAACAGTTGCGCAGCCTGA  
ATGGCGAATGGACGCGCCCTGTAGCGGCGCATTAAAGCGCGGGGTGTGGTGGTTACGCGCAGCGTGACCGCTACACTTG  
CCAGCGCCCTAGCGCCGCTCCTTTCGTTTTCTCCCTTCTTCTCGCACGTTTCGCCGGCTTTCCCGTCAAGCTCTAATC  
GGGGGCTCCTTAGGGTTCGATTAGTGCTTACGGCACCTCGAACTCAAACCTGATAGGGGTGAAGKTTYMACGGTWAGGT  
GGCC  
>S1.C2

GRKGGCTTKGKAATGATTTGGGGCTGTCTATTTAGGAGTCTATCAGATGATTATCTGGTTTGAAGACGGATCACTT  
TTTATAGCTGATATTTATATGTTTTAGCCTCCATTAGAACCTATGTTGTCTTATTTGGTATTTTGCATAAATTTGTA  
TCATCGGATGTTATAAGTCAATTGCTTCTGAAAATAAGTCAAGGTATGACATACAGAACAAAGTCTGTTATGAAATAAA  
TTCCACTTACTTGATTAAGTTTTATACTTTAGGTTTGGCTGGTTTGTCTACTGCAAAGTATTTGGCCGATGCAGGTCAT  
AAACCTATAGTGTGGGAAGCTAGGGATGTTCTGGGAGGAAAGGTAGCCAAATTACTCATTAGTGTTCATGAATTCCT  
TGTGGCATAATGGACTGTGTCAAAGTTCAAGGAAAGTCTTTCAAATTTTCCAGTATATGGATGTGGGAGTTGGTCTATA  
TGTGTGCAAATCGAATTCGCGCGCCGCATGGCGGCCGGGAGCATGCGACGTCGGGCCCAATTCGCCCTATAGTGAGTC  
GTATTACAATTCAGTGGCCGTCGTTTTACAACGTCGTGACTGGGAAAACCTGGCGTTACCCAACCTTAATCGCCTTGCAG  
CACATCCCCCTTTCGCCAGCTGGCGTAAATAGCGAAGAGGCCCGCACCGATCGCCCTCCCAACAGTTGCGCAGCCTGAAT  
GGCGAATGGACGCGCCCTGTAGCGGCGCATTAAAGCGCGGGGTGTGGTGGTTACGCGCAGCGTGACCGCTACACTTGCC  
AGCGCCCTAGCGCCGCTCCTTTCGTTTTCTCCCTTCTTCTCGCACGTTTCGCCGGCTTTCCCGTCAAGCTCTAAATCG  
GGGGGCTCCCTTAGGGTTCGATTAGTGCTTACGGCACTCGAACCAAACTGATATGGTGAATGGTCACGGTAGTGG  
GCATTCGCACCCCTGKCATGT  
>S1.C3

TGGRWKGCTKGTGATGATTTGGGGCTGTCTATTTAGGAGTCTATCAGATGATTATCTGGTTTGAAGACGGATCACTT  
TTTTATAGCTGATATTTATATGTTTTAGCCTCCATTAGAACCTATGTTGTCTTATTTGGTATTTTGCATAAATTTGTA  
TCATCGGATGTTATAAGTCAATTGCTTCTGAAAATAAGTCAAGGTATGACATACAGAACAAAGTCTGTTATGAAATAAA  
TTCCACTTACTTGATTAAGTTTTATACTTTAGGTTTGGCTGGTTTGTCTACTGCAAAGTATTTGGCCGATGCAGGTCAT  
AAACCTATAGTGTGGGAAGCTAGGGATGTTCTGGGAGGAAAGGTAGCCAAATTACTCATTAGTGTTCATGAATTCCT  
TGTGGCATAATGGACTGTGTCAAAGTTCAAGGAAAGTCTTTCAAATTTTCCAGTATATGGATGTGGGAGTTGGTCTATA  
TGTGTGCAAATCGAATTCGCGCGCCGCATGGCGGCCGGGAGCATGCGACGTCGGGCCCAATTCGCCCTATAGTGAGTC  
GTATTACAATTCAGTGGCCGTCGTTTTACAACGTCGTGACTGGGAAAACCTGGCGTTACCCAACCTTAATCGCCTTGCAG  
CACATCCCCCTTTCGCCAGCTGGCGTAAATAGCGAAGAGGCCCGCACCGATCGCCCTCCCAACAGTTGCGCAGCCTGAAT  
GGCGAATGGACGCGCCCTGTAGCGGCGCATTAAAGCGCGGGGTGTGGTGGTTACGCGCAGCGTGACCGCTACACTTGCC  
AGCGCCCTAGCGCCGCTCCTTTCGTTTTCTCCCTTCTTCTCGCACGTTTCGCCGGCTTTCCCGTCAAGCTCTAAATCG  
GGGGGCTCCCTTAGGGTTCGATTAGTGCTTACGGCACTCGAACCAAACTGATATGGTGAATGGTCACGGTAGTGG  
GCATTCGCACCCCTGKCATGT

GTATTACAATTCACTGGCCGTCGTTTTACAACGTCGTGACTGGGAAAACCTGGCGTTACCCAACCTAATCGCCTTGCA  
CACATCCCCCTTCGCCAGCTGGCGTAATAGCGAAGAGGCCCGCACCGATCGCCCTCCCAACAGTTGCGCAGCCTGAAT  
GGCGAATGGACGCGCCCTGTAGCGGCGCATTAAAGCGCGGGGTGTGGTGGTTACGCGCAGCGTGACCGCTACACTTGCC  
AGCGCCCTAGCGCCGCTCCTTCGCTTCTCCCTTCTTCGACGTTCCGCGCTTCCCGTCAAGCTCTAATCGG  
GGGCTCCTTAGGGTTCGATTTAGTGCTTACGCACTTCGACCCAAAACTGATAGGGGKGATGGATTCCASGTWRGKKG  
GGGG

>S1.C5

TGRRKGSCTTGTGATGATTTGGGGCTGTCTTATTTAGGAGTCCTATCAGATGATTATCTGGTTTGCAAGACGGATCACTT  
TTTATAGCTGATATTTATATGTTTTAGCCTCCATTAGAACCTATGTTGTCTTATTTGGTATTTTGCATAAAATTTGTA  
TCATCGGATGTTATAAGTCAATTGCTTCTGAAAAAAGTCAAGGTATGACATACAGAACAAAGTCTGTTATGAAATAAAT  
TTCCAATTACTTGATTAAGTTTTATACTTTCAGGTTTGGCTGGTTGTCTACTGCAAAGTATTTGGCCGATGCAGGTCAT  
AAACCTATAGTGTGGAAGCTAGGGATGTTCTGGGAGGAAAGGTAGCCAAATTACTCATTAGTGTTCATGAATTCCT  
TGTGGCATAATGGACTGTGCCAAAGTTCAAGGAAAGTCTTTCAAAATTTTCCAGTATATGGATGTGGGAGTTGGTCTATA  
TGTGTGCAAATCGAATTCGCGGGCCGCCATGGCGGCCGGGAGCATGCGACGTCGGGCCCAATTCGCCCTATAGTGAGTC  
GTATTACAATTCACTGGCCGTCGTTTTACAACGTCGTGACTGGGAAAACCTGGCGTTACCCAACCTAATCGCCTTGCA  
CACATCCCCCTTCGCCAGCTGGCGTAATAGCGAAGAGGCCCGCACCGATCGCCCTCCCAACAGTTGCGCAGCCTGAAT  
GGCGAATGGACGCGCCCTGTAGCGGCGCATTAAAGCGCGGGGTGTGGTGGTTACGCGCAGCGTGACCGCTACACTTGCC  
AGCGCCCTAGCGCCGCTCCTTCGCTTCTCCCTTCTTCGACGTTCCGCGCTTCCCGTCAAGCTCTAATC  
GGGGGCTCCCTTAGGGTTCGATTTAGTGCTTACGGCACCTCGACCCAAAAAACTGATTAAGGGGTGATGGATTCCACGT  
TRGTGKGGGCCA

>S1.C6

TKRAWGGCTGTGATGAATTTGGGGCTGTCTTATTTAGGAGTCCTATCAGATGATTATCTGGTTTGCAAGACGGATCACTT  
TTTATAGCTGATATTTATATGTTTTAGCCTCCATTAGAACCTATGTTGTCTTATTTGGTATTTTGCATAAAATTTGTA  
TCATCGGATGTTATAAGTCAATTGCTTCTGAAAAAAGTCAAGGTATGACATACAGAACAAAGTCTGTTATGAAATAAAT  
TTCCAATTACTTGATTAAGTTTTATACTTTCAGGTTTGGCTGGTTGTCTACTGCAAAGTATTTGGCCGATGCAGGTCAT  
AAACCTATAGTGTGGAAGCTAGGGATGTTCTGGGAGGAAAGGTAGCCAAATTACTCATTAGTGTTCATGAATTCCT  
TGTGGCATAATGGACTGTGCCAAAGTTCAAGGAAAGTCTTTCAAAATTTTCCAGTATATGGATGTGGGAGTTGGTCTATA  
TGTGTGCAAATCGAATTCGCGGGCCGCCATGGCGGCCGGGAGCATGCGACGTCGGGCCCAATTCGCCCTATAGTGAGTC  
GTATTACAATTCACTGGCCGTCGTTTTACAACGTCGTGACTGGGAAAACCTGGCGTTACCCAACCTAATCGCCTTGCA  
CACATCCCCCTTCGCCAGCTGGCGTAATAGCGAAGAGGCCCGCACCGATCGCCCTCCCAACAGTTGCGCAGCCTGAAT  
GGCGAATGGACGCGCCCTGTAGCGGCGCATTAAAGCGCGGGGTGTGGTGGTTACGCGCAGCGTGACCGCTACACTTGCC  
AGCGCCCTAGCGCCGCTCCTTCGCTTCTCCCTTCTTCGACGTTCCGCGCTTCCCGTCAAGCTCTAATC  
GGGGGCTCCCTTAGGGTTCGAATTAGTGCTTAAACGCACCTCGACCTAATCTGATTAGGTGATGTACAGTAGGKGGGGACC  
AAYAGTG

>S2.C2

AGGGKTGGRRGTTKGGTYWTGTGTGCAATCGAATTCGCGGGCCGCCATGGCGGCCGGGAGCATGCGACGTCGGGCC  
AATTCGCCCTATAGTGAGTCGTATTACAATTCACTGGCCGTCGTTTTACAACGTCGTGACTGGGAAAACCTGGCGTTAC  
CCAACCTAATCGCCTTGCAACATCCCCCTTCGCCAGCTGGCGTAATAGCGAAGAGGCCCGCACCGATCGCCCTCCC  
AACAGTTGCGCAGCCTGAATGGCGAATGGACGCGCCCTGTAGCGGCGCATTAAAGCGCGGGGTGTGGTGGTTACGCGCA  
GCGTGACCGCTACACTTGCCAGCGCCCTAGCGCCGCTCCTTTCGCTTCTTCCCTTCTTCTCGCCACGTTCCGCGGC  
TTTCCCGTCAAGCTCTAAATCGGGGGCTCCCTTAGGGTTCGATTTAGTGCTTACGGCACCTCGACCCAAAAAACT  
TGATTAGGGTGTGTTACGTAGTGGGCCATCGCCCTGATAGACGGTTTTTCGCCCTTGGAGTTGGAGTCCACGTTCT  
TTAATAGTGGACTCTTGTCCAAACTGGAACAACCTCAACCCTATCTCGGTCTATTCTTTGATTTATAAGGGATTTG  
CCGATTTCCGCTATTGGTTAAAAAATGAGCTGATTTAACAAAAATTAACGCGAATTTAACAAAAATTAACGCTTAC  
AATTTCTGATGCGGATTTTCTCCTTACGCATCTGTGCGGTATTTACACCCGCATCAGGTGGCACTTTTCGGGGAAATG  
TGCGCGGAACCCCTATTTGTTATTTTCTAAATACATTCAAAATATGTATCCGCTCATGAGACAATAACCTGATAAATG  
CTTCATAATATGAAAAGAGAGTATGAGTATCACATTTCCGTGTCGCCCTTATTCCCTTTTGGCGGCAGTTTGGCCTT  
TCCKGGTTTTK

>S2.C4

CCMCCCCCTTTCCGCCACGCTAGGCKAATAGCGAAGAGGCCCGCACCGATCGCCCTCCCAACAGTTGCGCAGCCTGAA  
TGCGAATGGACGCGCCCTGTAGCGGCGCATTAAAGCGCGGGGTGTGGTGGTTACGCGCAGCGTGACCGCTACACTTGC  
CAGCGCCCTAGCGCCGCTCCTTTCGCTTCTCCCTTCTTCTCGCCACGTTCCGCGCTTCCCGTCAAGCTCTAA  
ATCGGGGGCTCCCTTAGGGTTCGATTTAGTGCTTACGGCACCTCGACCCAAAAAACTGATTAAGGGTGTGTTCA  
CGTAGTGGGCCATCGCCCTGATAGACGGTTTTTCGCCCTTGGAGTCCACGTTCTTAAATAGTGGACTCTTGT  
CCAAACTGGAACAACCTCAACCCTATCTCGGTCTATTCTTTGATTTATAAGGGATTTGCCRATTYCGGCCTATTGGT  
TAAAAAATGAGCTGATTTACMAAMATTTAACGCGAATTTTYCAAATTAACGCTTACAATTTCTGATGCGGTATTT  
TCTCCTTACSCATCTGTGCGGTATTTACCMCGCCTCAGGTGGGACCTTTCGGGGAAATGTGCCGGAAACCACTATT

>S2.C6

TGAAWKGGCCTGTGAATGAATTTGGGGCTGTCTTATTTAGGAGTCCTATCAGATGATTATCTGGTTTGCAAGACGGATCA  
CTTTTTATAGCTGATATTTTATATGTTTTAGCCTCCATTAGAACCTATGTTGTCTTATTTTGGTATTTTGCATAAATTT  
GTATCATCGGATGTTATAAGTCAATTGCTTCTGAAAATAAGTCAAGGTATGACATACAGAACAAAGTCTGTTATGAAATA  
AATTTCCACTTACTTGATTAAGTTTTATACTTTAGGGATGTTCTGGGAGGAAAGGTAGCCAAATTATTACTCATTAGTG  
TTCATGAATTCCTTGTGGCATAATGGACTGTGTCAAAGTTCAAGGAAAGTCTTTCAAATTTTCCAGTATATGGATGTGG  
GAGTTGGTCTATATGTGTGCAAATCGAATTCGCGCGGCCCATGGCGGCCGGGAGCATGCGACGTGGGCCCAATTCG  
CCTATAGTGAGTCGATTACAATTCAGTGGCCGTCGTTTTACAACGTCGTGACTGGGAAAACCTGGCGTTACCCAACCTT  
AATCGCCTTGCGACACATCCCCCTTTCCGAGCTGGCGTAATAGCGAAGAGGCCCGCACCGATCGCCCTTCCCAACAGTT  
GCGCAGCCTGAATGGCGAATGGACGCGCCCTGTAGCGGCGCATTAAAGCGCGGGGTGTGGTGGTTACGCGCAGCGTGAC  
CGCTACACTTGCCAGCGCCCTAGCGCCGCTCCTTTCCGTTTCTCCCTTCTTTCTCGCCACGTTCCGCGGCTTTCCCC  
GTCAAGCTCTAAATCGGGGGCTCCCTTTAGGGTTCCGATTTAGTGCTTTACGGCACCTCGACCCAAAAAACTTGATTAG  
GGTGATGGGTTACGTAAGTGGGCCATCGCCTGATAGACGGTTTTCCGCTTTGACGTGGRCTCACGCTCTATAGTGAAC  
CTTGATCCAAACCGTKGGGACTAAC

>S2.C9

TGRKKGSKGTGAAWGAATTTGGGGGCTGTCTTATTTAGGAGTCCTATCAGATGATTATCTGGTTTGCAAGACGGATCAC  
TTTTTATAGCTGATATTTTATATGTTTTAGCCTCCATTAGAACCTATGTTGTCTTATTTTGGTATTTTGCATAAATTTG  
TATCATCGGATGTTATAAGTCAATTGCTTCTGAAAATAAGTCAAGGTATGACATACAGAACAAAGTCTGTTATGAAATAA  
ATTTCCACTTACTTGATTAAGTTTTATACTTTAGGTTTGGCTGGTTTGTCTACTGCAAAGTATTTGGCTGCAGGTCATA  
AACCTATAGTGTTGGAAGCTAGGGATGTTCTGGGAGGAAAGGTAGCCAAATTATTACTCATTAGTGTTCATGAATTCCTT  
GTGGCATAATGGACTGTGTCAAAGTTCAAGGAAAGTCTTTCAAATTTTCCAGTATATGGATGTGGGAGTTGGTCTATAT  
GTGTGCAAATCGAATTCGCGCGGCCCATGGCGGCCGGGAGCATGCGACGTGGGCCCAATTCGCCCTATAGTGAGTCG  
TATTACAATTCAGTGGCCGTCGTTTTACAACGTCGTGACTGGGAAAACCTGGCGTTACCCAACCTAATCGCCTTGCAGC  
ACATCCCCCTTTCCGAGCTGGCGTAATAGCGAAGAGGCCCGCACCGATCGCCCTTCCCAACAGTTGCGCAGCCTGAATG  
GCGAATGGACGCGCCCTGTAGCGGCGCATTAAAGCGCGGGGTGTGGTGGTTACGCGCAGCGTGACCGCTACACTTGCCA  
GCGCCCTAGCGCCGCTCCTTTCCGTTTCTCCCTTCTTTCTCGCACGTTCCGCGGCTTTCCCGTCAGCTCTAATCGGG  
GGCTCCTTAGGGTCCGATTTAGTGCTTACGCACTCGACCCAAAAAACTGAATTAGGGKTGATGGATTCAACGTWRGKGT  
GGGCCAAC

>S3.C1

GKRRKKGGSCKKGGKRAAKGAATTTGGGGGCTGTCTTATTTAGGAGTCCTATCAGATGATTATCTGGTTTGCAAGACSGA  
TCATTTTTATAGCTGATATTTTATATGTTTTAAATCGAATTCGCGCGGCCCATGGCGGCCGGGAGCATGCGACGTGCG  
GGCCCAATTCGCCCTATAGTGAGTCGATTACAATTCAGTGGCCGTCGTTTTACAACGTCGTGACTGGGAAAACCTGGC  
GTTACCCAACCTAATCGCCTTGCAGCACATCCCCCTTTCCGAGCTGGCGTAATAGCGAAGAGGCCCGCACCGATCGCCC  
TTCCCAACAGTTGCGCAGCCTGAATGGCGAATGGACGCGCCCTGTAGCGGCGCATTAAAGCGCGGGCGGGTGTGGTGGTTAC  
GCGCAGCGTGACCGCTACACTTGCCAGCGCCCTAGCGCCGCTCCTTTCCGTTTCTCCCTTCTTTCTCGCCACGTTCCG  
CCGGCTTTCCCGTCAAGCTCTAAATCGGGGGCTCCCTTTAGGGTCCGATTTAGTGCTTTACGGCACCTCGACCCAAA  
AACTTGATTAGGGTATGGTTCACGTAGTGGGCCATCGCCCTGATAGACGGTTTTTCCGCTTTGACGTTGGAGTCCAC  
GTTCTTTAATAGTGACTCTTGTTCAAAACCTGGAACAACACTCAACCCTATCTCGGTCTATTCTTTGATTTATAAGGGA  
TTTTGCCGATTTCCGCTATTGGTTAAAAAATGAGCTGATTTAACAAAAATTTAACGCGAATTTTAAACAAATTTAACGC  
TTACATTTCTGATGCGGTATTTTCTCCTTACGCATCTGTGCGGTATTTACACCCGCATCAGGTGGCACTTTTCCGGGGAA  
TGTGCGGGSAMCCCTATTTGTTATTTTTCTAATACATTCCAATWKGATATCGCTCATGAGAAMAATAACCTGGAWAAA  
KGCTTTYMA

>S3.C3

AGRRRWGSCTTGKGAATGAATTTGGGGGCTGTCTTATTTAGGAGTCCTATCAGATGATTATCTGGTTTGCAAGACGGAT  
CACTTTTTATAGCTGATATTTTATATGTTTTAGCCTCCATTAGAACCTATGTTGTCTTATTTTGGTATTTTGCATAAAT  
TTGTATCATCGGATGTTATAAGTCAATTGCTTCTGAAAATAAGTCAAGGTATGACATACAGAACAAAGTCTGTTATGAAA  
TAAATTTCCACTTACTTGATTAAGTTTTATACTTTAGGGTTTGGCTGGTTTGTCTACTGCAAAGTATTTGGCTGCAGGTC  
ATAAACCTATAGTGTTGGAAGCTAGGGATGTTCTGGGAGGAAAGGTAGCCAAATTATTACTCATTAGTGTTCATGAATTC  
CTTGTGGCATAATGGACTGTGTCAAAGTTCAAGGAAAGTCTTTCAAATTTTCCAGTATATGGATGTGGGAGTTGGTCTA  
TATGTGTGCAAATCACTAGTGAATTCGCGGCCGCTGCAGGTCGACCATATGGGAGAGCTCCCAACGCGTTGGATGCATA  
GCTTGAGTATTCTATAGTGTCACCTAAATAGCTTGGCGTAATCATGGTCATAGCTGTTTCTGTGTGAAATTTGTTATCCG  
CTCACAATTCACACAACATACGAGCCGGAAGCATAAAGTGTAAAGCCTGGGGTGCCTAATGAGTGAGCTAACTCACATT  
AATTGCGTTGCGCTCACTGCCGCTTTCCAGTCGGGAAACCTGTCGTGCCAGCTGCATTWATGAATCGGCCAACGCGCGG  
GGAGAGGCGGTTTGCATTTGGGCGCTCTCCGCTTCTCGCTCACTGACTCGCTGCGCTCGGTGCTTCCGCTGGCGGSG  
AGCGATATCAGCTCACTCAAAGGGCGGTAATACGTTATCCACAGAATCAGGGGATAACGCCATGAAGAAMCATGKTGTA  
GCAAARGGGCCGAGCCTAAG

>S3.C4

TRWKGGCTGTGATGAATTTGGGGCTGTCTTATTTAGGAGTCCTATCAGATGATTATCTGGTTTGCAAGACGGATCACTTT  
TTATAGCTGATATTTTATATGTTTTAGCCTCCATTAGAACCTATGTTGTCTTATTTTGGTATTTTGCATAAAATTTGTAT  
CATCGGATGTTATAAGTCAATTGCTTCTGAAAATAAGTCAAGGTATGACATACAGAACAAAGTCTGTTATGAAATAAAT  
TCCACTTACTTGATTAAGTTTTATACTTTTCAAGTTTTGGCTGGTTTGTCTACTGCAAAGTATTTGGCCGATGCAGGTCATA  
AACCTATAGTGTGGAAGCTAGGGATGTTCTGGGAGGAAAGGTAGCCAAATTATTACTCATTAGTGTTCATGAATTCCTT  
GTGGCATAATGGACTGTGTCAAAGTTCAAGGAAAGTCTTTCAAATTTTCCAGTATATGGATGTGGGAGTTGGTCTATAT  
GTGTGCAAATCGAATTCGCGCGGCCCATGGCGGCCGGGAGCATGCGACGTGCGGCCCAATTCGCCCTATAGTGAGTCG  
TATTACAATTCAGTGGCCGTCGTTTTACAACGTCGTGACTGGGAAAACCTGGCGTTACCCAACCTAATCGCCTTGCAGC  
ACATCCCCCTTTGCGCAGCTGGCGTAATAGCGAAGAGGCCCGCACCGATCGCCCTTCCCAACAGTTGCGCAGCCTGAATG  
GCGAATGGACGCGCCCTGTAGCGGCGCATTAAAGCGCGGGGGTGTGGTGGTTACGCGCAGCGTGACCGCTACACTTGCCA  
GCGCCCTAGCGCCGCTCCTTTGCTTTCTTCCCTTCTTCTCGCACGTTGCGCGCTTCCCGTCAAGCTTAATCGGGGG  
CTCCTTAGGGTTCGATTTAGTGCTTACGGCCACTCGAACCCCAAAAACTGATTAGGKATGGTCGGTACTGGCCAATSGC  
CGTGATAGTRC

>S3.C5

GAWGCTGTGATGATTTGGGGCTGTCTTATTTAGGAGTCCTATCAGATGATTATCTGGTTTGCAAGACGGATCACTTTTTA  
TAGCTGATATTTTATATGTTTTAGCCTCCATTAGAACCTATGTTGTCTTATTTTGGTATTTTGCATAAAATTTGTATCAT  
CGGATGTTATAAGTCAATTGCTTCTGAAAATAAGTCAAGGTATGACATACAGAACAAAGTCTGTTATGAAATAAATTTCC  
ACTTACTTGATTAAGTTTTATACTTTTCAAGTTTTGGCTGGTTTGTCTACTGCAAAGTATTTGGCTGCAGGTCATAAACCTA  
TAGTGTGGAAGCTAGGGATGTTCTGGGAGGAAAGGTAGCCAAATTATTACTCATTAGTGTTCATGAATTCCTTGTGGCA  
TAATGGACTGTGTCAAAGTTCAAGGAAAGTCTTTCAAATTTTCCAGTATATGGATGTGGGAGTTGGTCTATATGTGTGC  
AAATCGAATTCGCGCGGCCCATGGCGGCCGGGAGCATGCGACGTGCGGCCCAATTCGCCCTATAGTGAGTCGTATTAC  
AATTCAGTGGCCGTCGTTTTACAACGTCGTGACTGGGAAAACCTGGCGTTACCCAACCTAATCGCCTTGCAGCACATCC  
CCCTTTGCGCAGCTGGCGTAATAGCGAAGAGGCCCGCACCGATCGCCCTTCCCAACAGTTGCGCAGCCTGAATGGCGAAT  
GGACGCGCCCTGTAGCGGCGCATTAAAGCGCGGGGGTGTGGTGGTTACGCGCAGCGTGACCGCTACACTTGCCAGCGCCC  
TAGCGCCGCTCCTTTGCTTTCTTCCCTTCTTCTCGCACGTTGCGCGCTTCCCGTCAAGCTTAATCGGGGGG  
CTCCTTTAGGGTTCGATTTAGTGCTTACGGCACTTCGAACCCCAAAAACTTATTAGGTGATGGATTCMMSGTWARCC  
G

>S4.C2

TGWKGCATGTGATGATTTGGGGCTGTCTTATTTAGGAGTCCTATCAGATGATTATCTGGTTTGCAAGACGGATCACTTTT  
TATAGCTGATATTTTATATGTTTTAGCCTCCATTAGAACCTATGTTGTCTTATTTTGGTATTTTGCATAAAATTTGTATC  
ATCGGATGTTATAAGTCAATTGCTTCTGAAAATAAGTCAAGGTATGACATACAGAACAAAGTCTGTTATGAAATAAATTT  
CCACTTACTTGATTAAGTTTTATACTTTTCAAGTTTTGGCTGGTTTGTCTACTGCAAAGTATTTGGCCGATTGCAGGTCATA  
AACCTATAGTGTGGAAGCTAGGGATGTTCTGGGAGGAAAGGTAGCCAAATTATTACTCATTAGTGTTCATGAATTCCTT  
GTGGCATAATGGACTGTGTCAAAGTTCAAGGAAAGTCTTTCAAATTTTCCAGTATATGGATGTGGGAGTTGGTCTATAT  
GTGTGCAAATCGAATTCGCGCGGCCCATGGCGGCCGGGAGCATGCGACGTGCGGCCCAATTCGCCCTATAGTGAGTCG  
TATTACAATTCAGTGGCCGTCGTTTTACAACGTCGTGACTGGGAAAACCTGGCGTTACCCAACCTAATCGCCTTGCAGC  
ACATCCCCCTTTGCGCAGCTGGCGTAATAGCGAAGAGGCCCGCACCGATCGCCCTTCCCAACAGTTGCGCAGCCTGAATG  
GCGAATGGACGCGCCCTGTAGCGGCGCATTAAAGCGCGGGGGTGTGGTGGTTACGCGCAGCGTGACCGCTACACTTGCCA  
GCGCCCTAGCGCCGCTCCTTTGCTTTCTTCCCTTCTTCTCGCACGTTGCGCGCTTCCCGTCAAGCTTAATCGGGG  
CTCCTTTAGGTTTCGATTTAGTGCTTAMCGCACCTCGACCCCAAAAACTTGGATTAGGGGKAATGGGGTTYA

>S4.C3

AWGGSYYTKKKAATGAATTTGGGGCTGTCTTATTTAGGAGTCCTATCAGATGATTATCTGGTTTGCAAGACGGATCTCT  
TTTTATAGCTGATATTTTATATGTTTTAGCCTCCATTATTAACCTATGTTGTCTTATTTTGGTATTTTGCATAAAATTTG  
TATCATCGGATGTTATAAGTCAATTGCTTCTGAAAATAARTCAAGGTATGACATACAGAACAAAGTCTGTTATGAAATAA  
ATTTCCACTTACTTGATTAAGTTTTATACTTTTCAAGTTTTGGCTGGTTTGTCTACTGYAAAGTATTTGGCCGACTGCRGGT  
CATAAACCTATAGTGTGGAAGCTAGGGATGTYCTGGGAGGAAAGGWARCCAAATTATTACTCATTAGTGWTCATGAAT  
CCT

>S4.C4

GAWKGCATGTGATGATTTGGGGCTGTCTTATTTAGGAGTCCTATCAGATGATTATCTGGTTTGCAAGACGGATCACTTTT  
TATAGCTGATATTTTATATGTTTTAGCCTCCATTAGAACCTATGTTGTCTTATTTTGGTATTTTGCATAAAATTTGTATC  
ATCGGATGTTATAAGTCAATTGCTTCTGAAAATAAGTCAAGGTATGACATACAGAACAAAGTCTGTTATGAAATAAATTT  
CCACTTACTTGATTAAGTTTTATACTTTTCAAGTTTTGGCTGGTTTGTCTACTGCAAAGTATTTGGCCGACTGCAGGTCAA  
TCGAATTCGCGCGGCCCATGGCGGCCGGGAGCATGCGACGTGCGGCCCAATTCGCCCTATAGTGAGTCGTATTACAAT  
TCACTGGCCGTCGTTTTACAACGTCGTGACTGGGAAAACCTGGCGTTACCCAACCTAATCGCCTTGCAGCACATCCCC  
TTTCGCCAGCTGGCGTAATAGCGAAGAGGCCCGCACCGATCGCCCTTCCCAACAGTTGCGCAGCCTGAATGGCGAATGGA  
CGCGCCCTGTAGCGGCGCATTAAAGCGCGGGGGTGTGGTGGTTACGCGCAGCGTGACCGCTACACTTGCCAGCGCCCTAG  
CGCCGCTCCTTTGCTTTCTTCCCTTCTTCTCGCACGTTGCGCGCTTCCCGTCAAGCTTAATCGGGGGCTC

CCTTAGGGTTCCGATTTAGTGCTTTACGGCACCTCGACCCCAAAAACTTGATTAGGGTGATGGTTCACGTAGTGGGCC  
ATCGCCCTGATAGACGGTTTTTCGCCCTTTGACGTTGGAGTCCACGTTCTTTAATAGTGGACTCTTGTCCAAGTGGGAA  
CAACACTCAACCCTATCTCGTCTATTCTTTGATTATAGGCATTTTGCCGATTTGCGCCTATTTGAATTTAAAAAAAT  
>S4.C5

CRGGSCTKTTGAWTGAATTTGGGGCTGTCTTATTTAGGAGTCTATCAGATGATTATCTGGTTTGCAAGACGGATCACTT  
TTTATAGCTGATATTTTATATGTTTTAGCCTCCATTAGAACCTATGTTGTCTTATTTGGTATTTTGCATAAAATTTGTA  
TCATCGGATGTTATAAGTCAATTGCTTCTGAAAATAAGTCAAGGTATGACATACAGAACAAAGTCTGTTATGAAATAAAT  
TTCCACTTACTTGATTAAGTTTTATACTTTCAGGTTTGGCTGGTTTGTCTACTGCAAAGTATTTGGCCGATTGCAGGTCA  
TAAACCTATAGTGTGGAAAGCTAGGGATGTTCTGGGAGGAAAGGTAGCCAAATTATTACTCATTAGTGTTCATGAATTCC  
TTGTGGCATAATGGACTGTGTCAAAGTTCAAGGAAAGTCTTTCAAAATTTCCAGTATATGGATGTGGGAGTTGGTCTAT  
ATGTGTGCAAATCGAATTCGCCGCGCCGCATGGCGGCGGGAGCATGCGACGTCGGGCCCAATTCGCCCTATAGTGAGT  
CGTATTACAATCACTGGCCGTCGTTTTACAACGTCGTGACTGGGAAAACCCTGGCGTTACCCAACCTTAATCGCCTTGCA  
GCACATCCCCCTTTCGCCAGCTGGCGTAATAGCGAAGAGGCCCGCACCGATCGCCCTTCCCAACAGTTGCGCAGCCTGAA  
TGGCGAATGGACGCGCCCTGTAGCGGCGCATTAAAGCGCGGGGGTGTGGTGGTTACGCGCAGCGTGACCGCTACACTTGC  
CAGCGCCCTAGCGCCGCTCCTTTCGCTTCTTCCCTTCTTTCGCCACGTTGCGCCGCTTTCGCCGTCGCAAGCTCTAA  
TCGGGGGGCTCCCTTAGGGTCCGAATTAGTGCTTTACGCACTTCGACCCCAACCTTGATTAGGGGTGAAAKGATTTT  
ACMGSTKA



**Supplementary dataset 2:** Partial genomic DNA sequencing of *CcPDS* corresponding to sgRNA target 2 (exon 5). Abbreviations refer to the following samples: P: albino somatic seedlings, WT: control, untransformed; G: green seedlings (transformed); S: variegated seedlings (transformed); and C: different clones sequenced.

>P2.C1

CCYKKKGRSRGTWAWACCMTCTTGGTGCCTCAACATAAGATTGTCCACCCAGAATTGCTGGCAAGAGTCCAATTGCAAAT  
TTGACTTTCTCTGGCCAAGTAAGCATGTCATTATTCTTCAAGATGGCCCATATTCTGCAAGACCAATTTGAACACAATA  
TCCACATAAAAAACAAGTTACTTCATTTGAAATTTGGCTGCACAAATTAGCTCACCATTTAATGGTGTGGTAGCACCTCA  
GGAAAATCAAATCGACTGAACTCTCCAGGCTTATTTGGCATTGCAAATATCATTGAATGCTCCTTCCACTGACAACCGAT  
CATTAATTCCTAGTTCTCAAACAGGTTCTGCATATTTGGGTAAGCCCCAACTTAAGGTGGATCAAGAATCAATGTCA  
AGTTATTTGCTGCATCATAATGTATCTTAAAAAGAAACAAGAAGAATCATCTACATTCATGCTCATAAGAAATTCAAAA  
AGCACGGAACAAGATAAGGCAAATAATCGAATTCGCCGCGCCGATGGCGGCCGGGAGCATGCGACGTCGGGCCCAATT  
CGCCCTATAGTGAGTCGATTACAATCACTGGCCGTCGTTTTACAACGTCGTGACTGGGAAAACCTGGCGTTACCCAA  
CTTAATCGCCTTGCAGCACATCCCCCTTTCGCCAGCTGGCGTAATAGCGAAGAGGCCCGCACCGATCGCCCTTCCAACA  
GTTGCGCAGCCTGAATGGCGAATGGACGCGCCCTGTAGCGGCGCATTAAAGCGCGGGCGGGTGTGGTGGTTACGCGCAGCGT  
GACCGCTACACTTGCAGCGCCCTAGCGCCGCTCTTTCGCTTTCTTCCCTCTTTCTCGCACGTTCCGCCGCTTCCCGT  
CAGCTCTAATCGGGGGCTCCTTAGGGTTCGATTAGTGCTTACGGCACTCGACCCAAAACTGATAGGGTATGTCMGGTAC  
KGGGACATGCCCGTGTATATAGAGCCG

>P6.C3

GWYCCMMMCCCCMRGAAATTTGCTGGCAAGAGTCCAATTGCMAWCTTTWGAMTTTCTCTGGCCAAGTAAGCATGTCATTA  
TTCTTCAWGATGGCCCATATTCTGCAAGACCAATTTGAACACAATATCCACATAAAAAACAAGTTACTTCATTTGAAATT  
TGGCTGCACAAATTAGCTCACCATTTAATGGTGTGGTAGCACCTCAGGAAAATCAAATCGACTGAACTCTCCAGGCTTA  
TTTGGCATTGCAAATATCATTGAATGCTCCTTCCACTGCCAACCGATCATTAAATTCCTAGTTCTCAAACAGGTTCTGCA  
TATTTGGGTAAGCCCCAACTTAAGGTGGATCAAGAATCAATGTCAAGTTATTTGCTGCATCATAATGTATCTTAAAA  
GAAACAAGAAGAATCATCTACMTTCATGCTCATAARAAATTCMAAAAAGCWGGAACWAGATAAGGCAAATAATCTAATT  
CYCGCGKCGCCATGGCGGCCGAATCATGCRACGTGC

>P6.C4

ACYTKMMGTTWWACCATCTTGTGCCTCAACATAAGATTGTCCACCCAGAATTGCTGGCAAGAGTCCAATTGCAAATTTG  
ACTTCTCTGGCCAAGTAAGCATGTCATTATTCTTCAAGATGGCCCATATTCTGCAAGACCAATTTGAACACAATATCC  
ACATAAAAAACAAGTTACTTCATTTGAAATTTGGCTGCACAAATTAGCTCACCATTTAATGGTGTGGTAGCACCTCAGGA  
AAATCAAATCGACTGAACTCTCCAGGCTTATTTGGCATTGCAAATATCATTGAATGCTCCTTCCACTGCCAACCGATCAT  
TAATTCCTAGTTCTCAAACAGGTTCTGCATATTTGGGTAAGCCCCAACTTAAGGTGGATCAAGAATCAATGTCAAGT  
TATTTGCTGCATCATAATGTATCTTAAAAAGAAACAAGAAGAATCATCTACATTCATGCTCATAAGAAATTCAAAAAGC  
ACGGAACAAGATAAGGCAAAAATCGAATTCGCCGCGCCGATGGCGGCCGGGAGCATGCGACGTCGGGCCCAATTCGCG  
CTATAGTGAGTCGATWACAATCACTGGCCGTCGTTTTACAACGTCGTGACTGGGAAAACCTGGCGTTACCCAACTTA  
ATCGCCTTGCAGCACATCCCCCTTSCCCAGCTGGCGTAAATASC

>P7.C1

ACTKTMRGTTWWACCATCTTGTGCCTCAACATAAGATTGTCCACCCAGAATTGCTGGCAAGAGTCCAATTGCAAATTTGAC  
TTTCTCTGGCCAAGTAAGCATGTCATTATTCTTCAAGATGGCCCATATTCTGCAAGACCAATTTGAACACAATATCCAC  
ATAAAAAACAAGTTACTTCATTTGAAATTTGGCTGCACAAATTAGCTCACCATTTAATGGTGTGGTAGCACCTCAGGAAA  
ATCAAATCGACTGAACTCTCCAGGCTTATTTGGCATTGCAAATATCATTGAATGCTCCTTCCACAACCGATCATTAAATC  
CTAGTTCTCAAACAGGTTCTGCATATTTGGGTAAGCCCCAACTTAAGGTGGATCAAGAATCAATGTCAAGTTATTTG  
CTGCATCATAATGTATCTTAAAAAGAAACAAGAAGAATCATCTACATTCATGCTCATAAGAAATTCAAAAAGCACGGAA  
CAAGATAAGGCAAATAAATCGAATTCGCCGCGCCGATGGCGGCCGGGAGCATGCGACGTCGGGCCCAATTCGCCCTAT  
AGTGAGTCGATTACAATCACTGGCCGTCGTTTTACAACGTCGTGACTGGGAAAACCTGGCGTTACCCAACTTAATCG  
CCTTGACGACATCCCCCTTTCGCCAGCTGGCGTAATAGCGAAGAGGCCCGCACCGATCGCCCTTCCAACAAGTTGCGCA  
GCCTGAATGGCGAATGGACGCGCCCTGTAGCGGCGCATTAAAGCGCGGGCGGGTGTGGTGGTTACGCGCAGCGTGACCGT  
ACACTTGCCAGCGCCCTAGCGCCGCTCCTTTGCTTTCTTCCCTTCTTTCTCGCCACGTTSGCCGCTTCCCGCTCA  
AGCTCTAAATCGGGGGGCTCCCTTAGGGTTCGAATTAGTGCTTACCGCACCTTCGACCCAAAACCTTGATTARCGA  
TGATAGGAGTTYAS

>P7.C2

GWMRGKTTWWCMATCTTGTGGCCTCAACATAAGATTGTCCACCCAGAATTGCTGGCAAGAGTCCAATTGCAAATTTGAC  
TTTCTCTGGCCAAGTAAGCATGTCATTATTCTTCAAGATGGCCCATATTCTGCAAGACCAATTTGAACACAATATCCAC  
ATAAAAAACAAGTTACTTCATTTGAAATTTGGCTGCACAAATTAGCTCACCATTTAATGGTGTGGTAGCACCTCAGGAAA  
ATCAAATCGACTGAACTCTCCAGGCTTATTTGGCATTGCAAATATCATTGAATGCTCCTTCCACAACCGATCATTAAATC  
CTAGTTCTCAAACAGGTTCTGCATATTTGGGTAAGCCCCAACTTAAGGTGGATCAAGAATCAATGTCAAGTTATTTG

CTGCATCATAATGTATCTTAAAAAGAAACAAGAAGAATCATCTACATTCATGCTCATAAGAAATTCAAAAAGCACGGAA  
CAAGATAAGGCAAATAAATCGAATTCCTCCGCGGCCCATGGCGGCCGGGAGCATGCGACGTCGGGCCCAATTCGCCCTAT  
AGTGAGTCGTATTACAATTCAGTGGCCGTCGTTTTACTCGTCGTGACTGGGAAAACCTGGCGTTACCCAATTAATCGC  
CTTGACGACATCCCCCTTCGCCAGCTGGCGTAATAGCKAAGAGGCCCGCACCGATCGCCWTCACACAGTTYGCCA  
CCTGAAGGMMAATGGGACA

>P7.C3

GCTKKKMSGTWWCMTCTTGTGCCTCAACATAAGATTGTCCACCCAGAATTGCTGGCAAGAGTCCAATTGCAAATTTGACT  
TTCTCTGGCCAAGTAAGCATGTCATTATTCTCAAGATGGCCCATATTCCTGCAAGACCAATTTGAACACAATATCCACA  
TAAAAACAAGTTACTTCATTTGAAATTTGGCTGCACAAATTAGCTCACCATTTAATGGTGCTGGTAGCACCTCAGGAAAA  
TCAAATCGACTGAACTCTCCAGGCTTATTTGGCATTGCAAATATCATTGAATGCTCCTTCCACAACCGATCATTAAATCC  
TAGTTCTCAAACAGGTTCTGCATATTTGGGTAAGCCCCAACTTAAGGTGGATCAAGAATCAATGTCACAAGTTATTTGC  
TGCATCATAATGTATCTTAAAAAGAAACAAGAAGAATCATCTACATTCATGCTCATAAGAAATTCAAAAAGCACGGAAAC  
AAGATAAGGCAAATAAATCGAATTCCTCCGCGGCCCATGGCGGCCGGGAGCATGCGACGTCGGGCCCAATTCGCCCTATA  
GTGAGTCGTATTACAATTCAGTGGCCGTCGTTTTACAACGTCGTGACTGGGAAAACCTGGCGTTACCCAATTAATCGC  
CTTGACGACATCCCCCTTCGCCAGCTGGCGTAATAGCGAAGAGGCCCGCACCGATCGCCCTTCCAAACAGTTGCGCAG  
CCTGAATGGCGAATGGACGCGCCCTGTAGCGGCGCATTAAAGCGCGCGGGGTGTGGTGGTTACGCGCAGCGTGACCGCTAC  
ACTTGCCAGCGCCCTAGCGCCCGCTCCTTTGCTTTCTCCCTTCTTTCTCGCCACGTTTCGCCGGCTTTCCCGTCAAGC  
TCTAAATCGGGGGCTCCCTTAAGGTTGATTAGTGCTTACGGCACCTCGAACCCAAAAAACTTGATWRRGGGGTGA  
ATGGGGAT

>P7.C4

ACTKKKMGKTWWCMTCTTGTGCCTCAACATAAGATTGTCCACCCAGAATTGCTGGCAAGAGTCCAATTGCAAATTTGACT  
TTCTCTGGCCAAGTAAGCATGTCATTATTCTCAAGATGGCCCATATTCCTGCAAGACCAATTTGAACACAATATCCACA  
TAAAAACAAGTTACTTCATTTGAAATTTGGCTGCACAAATTAGCTCACCATTTAATGGTGCTGGTAGCACCTCAGGAAAA  
TCAAATCGACTGAACTCTCCAGGCTTATTTGGCATTGCAAATATCATTGAATGCTCCTTCCACAACCGATCATTAAATCC  
TAGTTCTCAAACAGGTTCTGCATATTTGGGTAAGCCCCAACTTAAGGTGGATCAAGAATCAATGTCACAAGTTATTTGC  
TGCATCATAATGTATCTTAAAAAGAAACAAGAAGAATCATCTACATTCATGCTCATAAGAAATTCAAAAAGCACGGAAAC  
AAGATAAGGCAAATAAATCGAATTCCTCCGCGGCCCATGGCGGCCGGGAGCATGCGACGTCGGGCCCAATTCGCCCTATA  
GTGAGTCGTATTACAATTCAGTGGCCGTCGTTTTACAACGTCGTGACTGGGAAAACCTGGCGTTACCCAATTAATCGC  
CTTGACGACATCCCCCTTCGCCAGCTGGCGTAATAGCGAAGAGGCCCGCACCGATCGCCCTTCCAAACAGTTGCGCAG  
CCTGAATGGCGAATGGACGCGCCCTGTAGCGGCGCATTAAAGCGCGCGGGGTGTGGTGGTTACGCGCAGCGTGACCGCTA  
CACTTGCCAGCGCCCTAGCGCCCGCTCCTTTGCTTTCTCCCTTCTTTCTCGCCACGTTTCGCCGGCTTTCCCGTCAA  
GCTCTAAATYSGGGGGCTCCCTTAAGGTTCCGATTAGTGCTTACGCACCTCGACCCMAAAAACTKGAATTAAGGGGG  
KGRATAGT

>P10.C1

ACYYTKKRMGGTWAWACCATCTTGTGCCTCAACATAAGATTGTCCACCCAGAATTGCTGGCAAGAGTCCAATTGCAAATT  
TGACTTTCTCTGGCCAAGTAAGCATGTCATTATTCTCMAGATGGCCCATATTCCTGCAAGACCAATTTGAACACAATAT  
CCACATAAAAAACAAGTTACTTCATTTGAAATTTGGCTGCACAAATTAGCTCACCATTTAATGGTGCTGGTAGCACCTCAG  
GAAAATCAAATCGACTGAACTCTCCAGGCTTATTTGGCATTGCAAATATCATTGAATGCTCCTTCCACTGGCAACCGATC  
ATTAATTCCTAGTTCTCAAACAGGTTCTGCATATTTGGGTAAGCCCCAACTTAAGGTGGATCAAGAATCAATGTCACAA  
GTTATTTGCTGCATCATAATGTATCTTAAAAAGAAACAAGAAGAATCATCTACATTCATGCTCATAAGAAATTCAAAA  
GCACGGAACAAGATAAGGCAAAAATCGAATTCCTCCGCGGCCCATGGCGGCCGGGAGCATGCGACGTCGGGCCCAATTCG  
CCCTATAGTGAGTCWTATTACAATTCAGTGGCCGTCGTTTTACAACGTCATGACTGGGAAAACCTGGCATTACCCAAT  
TAAT

>P10.C2

CGTAAAAACASGAKGGGGARKGTTCTCTGGCCAAGTAAGCATGTCATTATTCTCCAARAWAGGCCCATATTCCTGCAAG  
ACCAATTTGAACACAATATCCACATAAAAAACAAGTTACTTCATTTGAAATTTGGCTGCACAAATTASCTCACCATTTAAT  
GGTGCTGGTAGCACCTCAGGAAAATCAAATCGACTGAACTCTCCAGGCTTATTTGGCATTGCAAATATCATTGAATGCTC  
CTTCCACTGGCAACCGATCATTAAATTCAGTTCTCAAACAGGTTCTGCATATTTGGGTAAGCCCCAACTTAAGGTGGA  
TCAAGAATCAATGTCACAAGTTATTTGCTGCATCATAATGTATCTTAAAAAGAAACAAGAAGAATCATCTACATTCATGC  
TCATAAGAAATTCAAAAAGCACGGAACAAGATAAGGCAAATAATCGAATTCCTCCGCGGCCCATGGCGGCCGGGAGCAT  
GCGACGTCGGGCCCAATTCGCCCTATAGTGAGTCGTATTACAATTCAGTGGCCGTCGTTTTACAACGTCGTGACTGGGAA  
AACCTGGCGTTACCCAATTAATCGCCTTGCAGCAGATCCCCCTTCGCCAGCTGGCGTAAATAGCGAAGAGGCCCGCA  
CCGATCGCCCTTCCAAACAGTTGCGCAGCCTGAATGGCGAAWGGACGCGCCCTGTAGCGGCGCATTAAAGCGCGGGGGGT  
GTGGTGGTTACGCGCAGCGTGACCGCTACACTTGCCAGCGCCCTAGCGCCGCTCTTTGCTTTCTCCCTTCTTTCTCGC  
CASTTYGCCGGCTTYCCCGTCAARCTMTAAATCGGGGGCTTCC

>P10.C3

TMRGTTWWCCATCTTGTGCCTCAACATAAGATTGTCCACCCAGAATTGCTGGCAAGAGTCCAATTGCAAATTTGACTTTC

TCTGGCCAAGTAAGCATGTCATTATTCTCAAGATGGCCCATATTCTGCAAGACCAATTTGAACACAATATCCACATAA  
AAACAAGTTACTTCATTTGAAATTTGGCTGCACAAATTAGCTCACCATTTAATGGTGTGGTAGCACCTCAGGAAAAATCA  
AATCGACTGAACTCTCCAGGCTTATTTGGCATTGCAAATATCATTGAATGCTCCTTCCACTGGCAACCGATCATTAAATC  
CTAGTTCTCAAACAGGTTCTGCATATTTGGGTAAGCCCCAACTTAAGGTGGATCAAGAATCAATGTCACAAGTTATTTG  
CTGCATCATAATGTATCTTAAAAAGAAACAAGAAGAATCATCTACATTCATGCTCATAAGAAATTCAAAAAGCACGGAA  
CAAGATAAGGCAAATAATCGAATTCGCCGCGCCGCATGGCGGCCGGGAGCATGCGACGTCGGGCCCAATTCGCCCTATA  
GTGAGTCGTATTACAATCACTGGCCGTCGTTTTACAACGTCGTGACTGGGAAAAACCCTGGCGTTACCCAACCTAATCGC  
CTTGACGACATCCCCCTTTTCGCCAGYTGCGTAAATAAKCGAA

>P10.C5

GACGKGGTWWCMTCTTGTGCCTCAACATAAGATTGTCCACCCAGAATTGCTGGCAAGAGTCCAATTGCAAATTTGACTTT  
CTCTGGCCAAGTAAGCATGTCATTATTCTCAAGATGGCCCATATTCTGCAAGACCAATTTGAACACAATATCCACATA  
AAAACAAGTTACTTCATTTGAAATTTGGCTGCACAAATTAGCTCACCATTTAATGGTGTGGTAGCACCTCAGGAAAAATC  
AAATCGACTGAACTCTCCAGGCTTATTTGGCATTGCAAATATCATTGAATGCTCCTTCCACTGGCAACCGATCATTAAAT  
CCTAGTTCTCAAACAGGTTCTGCATATTTGGGTAAGCCCCAACTTAAGGTGGATCAAGAATCAATGTCACAAGTTATTT  
GCTGCATCATAATGTATCTTAAAAAGAAACAAGAAGAATCATCTACATTCATGCTCATAAGAAATTCAAAAAGCACGGAA  
ACAAGATAAGGCAAATAATCGAATTCGCCGCGCCGCATGGCGGCCGGGAGCATGCGACGTCGGGCCCAATTCGCCCTAT  
AGTGAGTCGTATTACAATCACTGGCCGTCGTTTTACAACGTCGTGACTGGGAAAAACCCTGGCGTTACCCAACCTAATCG  
CCTTGACGACATCCCCCTTTTCGCCAGCTGGCGTAATAGCGAAGAGGCCCGCACCGATCGCCCTTCCAACAGTTGCGCA  
GCCTGAATGGCGAATGGACGCGCCCTGTAGCGGCGCATTAAAGCGCGGCGGGTGTGGTGGTTACGCGCAGCGTGACCGCTA  
CACTTGCCAGCGCCCTAGCGCCGCTCCTTTTCGCTTTCTCCCTTCTTCTCGCCACGTTGCGGGCTTTCCCGTCAAG  
CTCTAAATCGGGGGGGCTYCCCTTTAGGGGGTTTCCCGAT

>P2.C2

GKGGSSCTTCAACMGTRAAGATTGTCCACCCRGAATTGCTGGCAAGAGTCCAATTGCAAATTTGACTTTCTCTGGCCAAG  
TAAGCATGTCATTATTCTCAAGATGGCCCATATTCTGCAAGACCAATTTGAACACAATATCCACATAAAAAACAAGTTA  
CTTCATTTGAAATTTGGCTGCACAAATTAGCTCACCATTTAATGGTGTGGTAGCACCTCAGGAAAAATCAAATCGACTGA  
ACTCTCCAGGCTTATTTGGCATTGCAAATATCATTGAATGCTCCTTCCACTGTCAACCGATCATTAAATCCTAGTTCTCC  
AAACAGGTTCTGCATATTTGGGTAASCCCCAACTTAAGGTGGATCAAGAATCAATGTCACAAGTTATTTGCTGCATCATA  
ATGTATCTTAAAAAGAAACAAGAAGAATCATCTACATTCATGCTCATAAGAAATTCAAAAAGCACGGAACAAGATAAGG  
CAAATAATCGAATTCGCCGCGCCGCATGGCGGCCGGGAGCATGCGACGTCGGGCCCAATTCGCCCTATAGTGAGTCGTA  
TTACAATCACTGGCCGTCGTTTTACAACGTCGTGACTGGGAAAAACCCTGGCGTTACCCAACCTAATCGCCTTGACGAC  
ATCCCCCTTTTCGCCAGCTGGCGTAATAGCGAAGAGGCCCGCACCGATCGCCCTTCCAACAGTTGCGCAGCTGAATGGC  
GAATGGACGCGCCCTGTAGCGGCGCATTAAAGCGCGGCGGGTGTGGTGGTTACGCGCAGCGTGACCGCTACACTTGCCAG  
GCCCTAGCGCCGCTCCTTTTCGCTTTCTCCCTTCTTCTCGCCACGTTGCGGGCTTTCCCGTCAAGCTCTAAATCGG  
GGGCTCCTTTWAGGTTTCGATTTAGTGCTTACGGCACTCGACCCAACTGATAGGGTGAATGGTCACGTAGKGGGCCAY  
GCCCCGKAGWAR

>P2.C3

TGTTCTTKGGKTGGCCTCAACATAAGATTGTCCACCCAGAATTGCTGGCAAGAGTCCAATTGCMWATTTGACTTTCTCT  
GGCCAAGTAAGCATGTCATTATTCTCAAGATGGCCCATATTCTGCAAGACCAATTTGAACACAATATCCACATAAAAA  
CAAGTTACTTCATTTGAAATTTGGCTGCACAAATTAGCTCACCATTTAATGGTGTGGTAGCACCTCAGGAAAAATCAAAT  
CGACTGAACTCTCCAGGCTTATTTGGCATTGCAAATATCATTGAATGCTCCTTCCACTGACAACCGATCATTAAATCCTA  
GTTCTCAAACAGGTTCTGCATATTTGGGTAAGCCCCAACTTAAGGTGGATCAAGAATCAATGTCACAAGTTATTTGCTG  
CATCATAATGTATCTTAAAAAGAAACAAGAAGAATCATCTACATTCATGCTCATAAGAAATTCAAAAAGCACGGAACAA  
GATAAGGCAAATAATCGAATTCGCCGCGCCGCATGGCGGCCGGGAGCATGCGACGTCGGGCCCAATTCGCCCTATAGTG  
AGTCGTATTACAATCACTGGCCGTCGTTTTACAACGTCGTGACTGGGAAAAACCCTGGCGTTACCCAACCTAATCGCCTT  
GCAGCACATCCCCCTTTTCGCCAGCTGGCGTAATAGCGAAGAGGCCCGCACCGATCGCCCTTCCAACAGTTGCGCAGCCT  
GAATGGCGAATGGACGCGCCCTGTAGCGGCGCATTAAAGCGCGGCGGGTGTGGTGGTTACGCGCAGCGTGACCGCTACACT  
TGCCAGCGCCCTAGCGCCGCTCCTTTTCGCTTTCTCCCTTCTTCTCGCACGTTGCGGGCTTTCCCGTCAAGCTCTAAT  
CGGGGGCTCCTTTAGGGTTCGATTAGTGCTTACGGCACTCGACCCAACTGATAGGGTGAATGGTTCASGARTGTGGGCCA  
TCSCCCACGT

>P2.C4

AWWRRRWKSYWMYRMRMMSTWRRRAYTKSGTATWCMTCTTGTGCCTCAACATAAGATTGTCCACCCAGAATTGCTGGC  
AAGAGTCCAATTGCWWTTTACTTTCTCTGGCCAAGTAAGCATGTCATTATTCTCAAGATGGCCCATATTCTGCAAG  
ACCAATTTGAACACAATATCCACATAAAAAACAAGTTACTTCATTTGAAATTTGGCTGCACAAATTAGCTCACCATTTAAT  
GGTGTGGTAGCACCTCAGGAAAAATCAAATCGACTGAACTCTCCAGGCTTATTTGGCATTGCAAATATCATTGAATGCTC  
CTTCCACTGACAACCGATCATTAAATCCTAGTTCTCAAACAGGTTCTGCATATTTGGGTAAGCCCCAACTTAAGGTGGA  
TCAAGAATCAATGTCACAAGTTATTTGCTGCATCATAATGTATCTTAAAAAGAAACAAGAAGAATCATCTACATTCATGC  
TCATAAGAAATTCAAAAAGCACGGAACAAGATAAGGCAAATAATCGAATTCGCCGCGCCGCATGGCGGCCGGGAGCAT

GCGACGTCGGGCCCAATTCGCCCTATAGTGAGTCGTATTACAATTCCTGCGCCGTCGTTTTACAACGTCGTGACTGGGAA  
AACCTGGCGTTACCCAACTTAATCGCCTTGCARCATCCCCCTTCGCCAGCTGGCGTAATAGCGAAGAGGCCCGCAC  
CGATCGCCCTCCCAACAGTTGCGCAGCCTGAATGGCGAATGGACGCGCCCTGTAGCGGCGCATTAAAGCGCGGGTGT  
GGTGGTTACGCGCAGCGTGACCGCTACACTTGACGCGCCCTAGCGCCGCTCCTTCGCTTCTTCTTCCTTYYCGCCMGT  
TCGCGGCTTCCCGTCAGCTCTAAATCGGGGCTCGTTAGGATCGAATTTATGGCTTACGTACCTCGACCCCMAAAACK  
GATATATCGG

>P3.C1

TMMAAMATAAAGAATTGTCACCCAGAATTGCTGGCAAGAGTCCAATTGCAAATTTGACTTTCTCTGGCCAAGTAAGCA  
TGTCATTATTCTCAAGATGGCCATATTCTGCAAGACCAATTTGAACACAATATCCACATAAAAAACAAGTTACTTCAT  
TTGAAATTTGGCTGCACAAATTAGCTCACCATTTAATGGTGTGGTAGCACCTCARGAAAATCAAATCRACTGAECTCTC  
CAGGCTTATTTGGCATTGCAAATATCATTGAATGCTCCTTCCACTGTCAACCGATCATTAAATCTAGTTCTCCAAACAG  
GTTCTGCATAWTTGGGTAARCCCACTTAAGGTGGAT

>P3.C2

GWGGCCMWMACATAAARATTGTCCACCCAGAATGCTGGCAAGAGTCCAATTGCWWATTTGACTTTCTCTGGCCAAGTA  
AGCATGTATTATTCTCAARATGGCCATATTCTGCAAGACCAATTTGAACACAATATCCACATAAAAAACAAGTTACT  
TCATTTGAAATTTGGCTGCACAAATTAGCTCACCATTTAATGGTGCWGGTASCACCTCAGGAAAATCAAATCAACWGA

>P3.C3

TTGGTKGGCCTCAACATAAGGATTGTCCACCCAGAATTGCTGGCAAGAGTCCAATTGCAAATTTGACTTTCTCTGGCCA  
AGTAAGCATGTATTATTCTCAAGATGGCCATATTCTGCAAGACCAATTTGAACACAATATCCACATAAAAAACAAGT  
TACTTCATTTGAAATTTGGCTGCACAAATTAGCTCACCATTTAATGGTGTGGTAGCACCTCAGGAAAATCAAATCGACT  
GAACTCTCAGGCTTATTTGGCATTGCAAATATCATTGAATGCTCCTTCCACTGTCAACCGATCATTAAATCCTAGTTCT  
CCAAACAGGTTCTGCATATTTGGGTAASCCCACTTAAGGTGGATCAAGAATCAATGTCACAAGTTATTTGCTGCATCA  
TAATGTATCTTAAAAAGAAACAAGAAGAATCATCTACATTCATGCTCATAAGAAATTTAAAAAAGCACGGAACAAGATAA  
GGCAAATAATCGAATTCGCGGCCCGCCATGGCGGCCGGAGCATGCGACGTCGGGCCAAATTCGCCCTATAGTGAGTCG  
TATTACAATTCAGTGGCCGTCGTTTTACAACGTCGTGACTGGGAAAACCTGGCGTTACCCAACTTAATCGCCTTGCAGC  
ACATCCCCCTTCGCCAGCTGGCGTAATAGCGAAGAGGCCCGCACCGATCGCCCTTCCAAACAGTTGCGCAGCCTGAATG  
GCGAATGGACGCGCCTGTAGCGGCGCATTAAAGCGCGCGGGTGTGGTGGTTACGCGCAGCGTGACCGTACACTTGCCA  
GCGCCCTAGCGCGCTCCTTTCGCTTTCTCCCTTCTTTCGACGTTTCGCGGCTTCCCGTCAAGCTCTAAATCGGG  
GGGCTCCTWAGGATYCGATTARTGCTTACGGCACTCGAACCCAGAATGGATTAGGGTGATGTTMMGTAAGTGGCACT  
CGCCCGTGATK

>P3.C4

TCCSSMRYYTTKWMRTTWTCATCTTGTGCCTCAACATAAAGATTGTCCACCCAGAATTGCTGGCAAGAGTCCAAT  
TGCAAATTTGACTTTCTCTGGCCAAGTAAGCATGTATTATTCTCAAGATGGCCATATTCTGCAAGACCAATTTGAA  
CACAAATATCCACATAAAAAACAAGTTACTTCATTTGAAATTTGGCTGCACAAATTAGCTCACCATTTAATGGTGTGGTAG  
CACCTCAGGAAAATCAAATCGACTGAACTCTCAGGCTTATTTGGCATTGCAAATATCATTGAATGCTCCTTCCACTGTC  
AACCGATCATTAAATCCTAGTTCTCCAAACAGGTTCTGCATATTTGGGTAAGCCCCAACTTAAGGTGGATCAAGAATCAA  
TGTACAAGTTATTTGCTGCATCATAATGTATCTTAAAAAGAAACAAGAAGAATCATCTACATTCATGCTCATAAGAAAT  
TAAAAAAGCACGGAACAAGATAAGGCAAATAATCGAATTCGCGGCCCGCCATGGCGGCCGGGAGCATGCGACGTCGGG  
CCCAATTCGCCCTATAGTGAGTCGTATTACAATTCAGTGGCCGTCGTTTTACAACGTCGTGACTGGGAAAACCTGGCGT  
TACCCAACTTAATCGCCTTGCAGCAGATCCCCCTTCGCCAGCTGGCGTAATAGCGAAGAGGCCCGCACCGATCGCCCT  
CCAAACAGTTGCGCAGCCTGAATGGCGAATGGACGCGCCCTGTAGCGGCGCATTAAAGCGCGGGTGTGGTGGTTACGC  
GAGCGTGACCGTACACTTGCCAGCGCCCTAGCGCCGCTCCTTTCGCTTTCTTCCCTTCTTCTCGCACGTTTCGCCG  
GCTTCCCCGTCAGCTCTAATCGGGGCTCCTTAGATCGATTAGTGCTTACGCACCTCGAACCCAAAAACTTGATTAGG  
KKAAGTTTTMACG

>P3.C5

TAAACKMSTWWWCMATCTTGTGCCTCAACATAAAGATTGTCCACCCAGAATTGCTGGCAAGAGTCCAATTGCAAATTTGA  
CTTCTCTGGCCAAGTAAGCATGTATTATTCTCAAGATGGCCATATTCTGCAAGACCAATTTGAACACAATATCCA  
CATAAAAAACAAGTTACTTCATTTGAAATTTGGCTGCACAAATTAGCTCACCATTTAATGGTGTGGTAGCACCTCAGGAA  
AATCAAATCGACTGAACTCTCAGGCTTATTTGGCATTGCAAATATCATTGAATGCTCCTTCCACTGTCAACCGATCATT  
AATCCTAGTTCTCCAAACAGGTTCTGCATATTTGGGTAAGCCCCAACTTAAGGTGGATCAAGAATCAATGTCACAAGTT  
ATTTGCTGCATCATAATGTATCTTAAAAAGAAACAAGAAGAATCATCTACATTCATGCTCATAAGAAATTTAAAAAGCA  
CGGAACAAGATAAGGCAAAAATCGAATTCGCGGCCCGCCATGGCGGCCGGGAGCATGCGACGTCGGGCCAATTCGCC  
TATAGTGAGTCGTATTACAATTCAGTGGCCGTCGTTTTACAACGTCGTGACTGGGAAAACCTGGCGTTACCCAACTTAA  
TCGCCTTGACGACATCCCCCTTYYGCCAGCTGGCGTAATAGCGAAGAGGCCCGCACCGATCGCCCTTCCAAACAGTTGC  
GCAGCCTGAATGGCGAATGGACGCGCCCTGTAGCGGCGCATTAAAGCGCGGGGGTGTGGTGGTTACGCGCAGCGTGAC  
CRCTAMACTTGCCAGCGCCCTAGCGCCGCTYCTTTCGCTTTCATCMGTTCTTTCTTCCACGATCTCRYCCGGMC  
TMTCCCCGGAT

>P5.C1

GTTCCMMCCCCAGGAAATTGCTGGCAAGAGTCCAATTYSCWWWTTTGACTTTCTGCGCCAAGTAAGCATGTCATTAT  
TCTTCAAGATGGCCCATATTCCTGCAAGACCAATTTGAACACAATATCCACATAAAAAACAAGTTACTTCATTTGAAATTT  
GGCTGCACAAATTAGCTCACCATTTAATGGTGTGGTAGCACCTCAGGAAAATCAAATCGACTGAACCTCCAGGCTTAT  
TTGGCATTGCAAATATCATTGAATGCTCCTTCCACTGAACCGATCATTAATTCCTAGTTCTCCAAACAGGTTCTGCATAT  
TTGGGTAAGCCCAACTTAAGGTGGATCAAGAATCAATGTCACAAGTTATTTGCTGCATCATAATGTATCTTAAAAAGAA  
ACAAGAAGAATCATCTACATTCATGCTCATAAGAAATCAAAAAAGCACGGAACAAGATAAGGCAAATAATCGAATCCC  
GCGGCCGCATGGCGGCCGGGAGCATGCGACGTGGGCCAATTCRCCTATAGTGAGTCGTATTACAATTCAGTGGCCG  
TCGTTTTACAACGTCGTGACTGGGAAAACCTGGCGTTACCCAACCTAATCGCCTTGCAGCACATCCCCCTTCGCCAGC  
TGGCGTAATAGCGAAGAGGCCCGCACCGATCGCCCTTCCAACAGTTGCGCACCTGAATGGCGAATGGACGSCCCTGTA  
SCGGCGCATTTAAKCGCGGGGTGWGGTGGTTACGCGCAGCGTGACCGCTACCTTGCAGCGCCCTAACCMCCGCTCCTT  
TTASCTTT

>P5.C4

GATWWWCCMTCTTGTGCCTCAACATAAGATTGTCCACCCAGAATTGCTGGCAAGAGTCCAATTGCAAATTTGACTTTCTC  
TGGCCAAGTAAGCATGTCATTATTCTTCAAGATGGCCCATATTCCTGCAAGACCAATTTGAACACAATATCCACATAAAA  
ACAAGTTACTTCATTTGAAATTTGGCTGCACAAATTAGCTCACCATTTAATGGTGTGGTAGCACCTCAGGAAAATCAA  
TCGACTGAACCTCCAGGCTTATTTGGCATTGCAAATATCATTGAATGCTCCTTCCACTGAACCGATCATTAAATCCTAG  
TTCTCCAAACAGGTTCTGCATATTTGGGTAAGCCCAACTTAAGGTGGATCAAGAATCAATGTCACAAGTTATTTGCTGC  
ATCATAATGTATCTTAAAAAGAAACAAGAAGAATCATCTACATTCATGCTCATAAGAAATCAAAAAAGCACGGAACAAG  
ATAAGGCAAATAATCGAATTCGCGGCCGCCATGGCGGCCGGGAGCATGCGACGTGGGCCAATTCGCCCTATAGTGA  
GTCGTATTACAATTCAGTGGCCGTCGTTTTACAACGTCGTGACTGGGAAAACCTGGCGTTACCCAACCTAATCGCCTTG  
CAGCACATCCCCCTTCGCCAGCTGGCGTAAATAGCGAAGAGGCCCGCACCGATCGCCCTTCCMAACAGTTGCGCAGCC  
TGAATGGCGAATGGACGCGCCCTGTAGCGGCGCATWAAGCGCGGGGTGTGGTGGTTACGCGCAGCGKGACCGCTACAC  
TTGCCARCGCCCTTASCGCCMGCTCCMTTTTGTTTTCTCCCTTCTWTTCTGCCACSKTYCGCSGGCTTTCCCGWCA  
AGCTCTAAATCGGGGGCTCCYWTTAGGGTCCGAATTAGTGSTTTTACGGCACSTYSTACCCCMAAAAAACATTGRA  
ATTAKRGRKGAGAATGAKGATYCATAACGRMMKATASTS

>P5.C5

ATTWRCTWWCMTCTTGTGCCTCACATAAGATTGTCCACCCAGAATTGCTGGCAAGAGTCCAATTGCAAATTTGACTTTCT  
CTGGCCAAGTAAGCATGTCATTATTCTTCAAGATGGCCCATATTCCTGCAAGACCAATTTGAACACAATATCCACATAAAA  
AACAAGTTACTTCATTTGAAATTTGGCTGCACAAATTAGCTCACCATTTAATGGTGTGGTAGCACCTCAGGAAAATCAA  
ATCGACTGAACCTCCAGGCTTATTTGGCATTGCAAATATCATTGAATGCTCCTTCCACTGAACCGATCATTAAATCCTA  
GTTCTCCAAACAGGTTCTGCATATTTGGGTAAGCCCAACTTAAGGTGGATCAAGAATCAATGTCACAAGTTATTTGCTG  
CATCATAATGTATCTTAAAAAGAAACAAGAAGAATCATCTACATTCATGCTCATAAGAAATCAAAAAAGCACGGAACAA  
GATAAGGCAAATAATCGAATTCGCGGCCGCCATGGCGGCCGGGAGCATGCGACGTGGGCCAATTCGCCCTATAGTG  
AGTCGTATTACAATTCAGTGGCCGTCGTTTTACAACGTCGTGACTGGGAAAACCTGGCGTTACCCAACCTAATCGCCTT  
GCAGCACATCCCCCTTCGCCAGCTGGCGTAATAGCGAAGAGGCCCGCACCGATCGCCCTTCCAACAGTTGCGCAGCCT  
GAATGGCGAATGGACGCGCCCTGTAGCGGCGCATTAAAGCGCGGGGTGTGGTGGTTACGCGCAGCGTGACCGCTACACT  
TGCCAGCGCCCTAGCGCCGCTCCTTTGCTTTCTCCCTTCTTCTCGCCACGTGCGCGGCTTCCCGTCAAGCTCTA  
AATCGGGGGCTTCCCTTAGGATTCCGGAATTTWRKKTGCCT

>P5.C6

AMCCKKWMRGTWAWMCATCTTGTGCCTCAACATAAGATTGTCCACCCAGAATTGCTGGCAAGAGTCCAATTGCAAATTTG  
ACTTTCTGCGCCAAGTAAGCATGTCATTATTCTTCAAGATGGCCCATATTCCTGCAAGACCAATTTGAACACAATATCC  
ACATAAAAAACAAGTTACTTCATTTGAAATTTGGCTGCACAAATTAGCTCACCATTTAATGGTGTGGTAGCACCTCAGGA  
AAATCAAATCGACTGAACCTCCAGGCTTATTTGGCATTGCAAATATCATTGAATGCTCCTTCCACTGAACCGATCATT  
ATTCTAGTTCTCCAAACAGGTTCTGCATATTTGGGTAAGCCCAACTTAAGGTGGATCAAGAATCAATGTCACAAGTTA  
TTGCTGCATCATAATGTATCTTAAAAAGAAACAAGAAGAATCATCTACATTCATGCTCATAAGAAATCAAAAAAGCAC  
GGAACAAGATAAGGCAAATAATCGAATTCGCGGCCGCCATGGCGGCCGGGAGCATGCGACGTGGGCCAATTCGCC  
TATAGTGAGTCGTATTACAATTCAGTGGCCGTCGTTTTACAACGTCGTGACTGGGAAAACCTGGCGTTACCCAACCTAA  
TCGCCCTGCAGCACATCCCCCTTCGCCAGCTGGCGTAATAGCGAAGAGGCCCGCACCGATCGCCCTTCCAACAGTTGC  
GCAGCCTGAATGGCGAATGGACGCGCCCTGTAGCGGCGCATTAAAGCGCGGGGTGTGGTGGTTACGCGCAGCGTGACCG  
CTACACTTGCAGCGCCCTAGCGCCGCTCCTTTGCTTTCTCCCTTCTTCTCGCCACGTGCGCGGCTTCCCGTCAAGCTCTA  
GCTCTAAATCGGGGGCTTCCCTTAGGCTTCCCRATTTAGTKGCTTTTTACCGSGCG

>P6.C1

ATYKKRMGGTTWWCMTTCTTGKGCCTCAACATAAGATTGTCCACCCAGAATTGCTGGCAAGAGTCCAATTGCAAATTTG  
ACTTTCTGCGCCAAGTAAGCATGTCATTATTCTTCAAGATGGCCCATATTCCTGCAAGACCAATTTGAACACAATATCC  
ACATAAAAAACAAGTTACTTCATTTGAAATTTGGCTGCACAAATTAGCTCACCATTTAATGGTGTGGTAGCACCTCAGGA  
AAATCAAATCGACTGAACCTCCAGGCTTATTTGGCATTGCAAATATCATTGAATGCTCCTTCCACTGCCAACCGATCAT

TAATCCTAGTTCTCCAAACAGGTTCTGCATATTTGGGTAAGCCCCAACTTAAGGTGGATCAAGAATCAATGTCACAAGT  
TATTTGCTGCATCATAATGTATCTTAAAAAGAAACAAGAAGAATCATCTACATTCATGCTCATAAGAAATCAAAAAAGC  
ACGGAACAAGATAAGGCAAATAATCGAATTCGCCGCGCCGCATGGCGGCCGGGARCATGCGACGTCGGGCCCAATTCGC  
CCTATAGTGAGTCGATTACAATTCAGTGGSCGTCGTTTTACAACGTCGTGACTGGGAAAACCTGGCGTTACCCAACCTT  
AATCGCCTTGAGCACATCCCCCTTCGCCAGCTGGCGTAATARCGAAGAGGCCCGCACCGATCGCCCTTCCAACAGTT  
GCGCAGCCTGAATGGSGRAWGGRGCGSCCCTGTAGCGGCGCAYTWAAGCGCGGGGGTGTGGKGGGTWACGMGCARS  
GACCGCTMCACTTGCCAGCGCCCTARCGSMCGCTCCCTTSGCTTTTCTCCCTTWCTTTTCTSSCCASTTCGCCGGSYTT  
CCCMSTCAAGCTCTAAAWCCGGGGGCGCCCTTAGGGTTCTGATTWATGTGSTRAYGMGCA

>P6.C2

CSWGTKKKYRRWWWMMCCMMTCYTTGTGCCTCACATAAGATTGTCCACCCAGAATTGCTGGCAAGAGTCCAATTGCMAAT  
TTGACTTTCTCTGGCCAAGTAAGCATGTATTATTCTTCAMGATGGCCCATATTCCTGCAAGACCAATTTGAACACAATA  
TCCACATAAAAAACAAGTTACTTCATTTGAAATTTGGCTGCACAAATTAGCTCACCATTTAATGGTGTGGTAGCACCTCA  
GGAAAATCAAATCGACTGAACTCTCCAGGCTTATTTGGCATTGCAAATATCATTGAATGCTCCTTCCACTGCCAACCGAT  
CATAATTCTAGTTCTCCAAACAGGTTCTGCATATTTGGGTAAGCCCCAACTTAAGGTGGATCAAGAATCAATGTCACA  
AGTTATTTGCTGCATCATAATGTATCTTAAAAAGAAACAAGAAGAATCATCTACATTCATGCTCATAAGAAATCAAAAA  
AGCACGGAACAAGATAAGGCAAAAATCGAATTCGCCGCGCCGCATGGCGGCCGGGAGCATGCGACGTCGGGCCCAATTC  
GCCCTATAGTGAGTCGATTACAATTCAGTGGCGTCGTTTTACAACGTCGTGACTGGGAAAACCTGGCGTTACCCAAC  
TTAATCGCCTTGAGCACATCCCCCTTCGCCAGCTGGCGTAATAGCGAAGAGGCCCGCACCGATCGCCCTTCCAACAG  
TTGCGCAGCCTGAATGGCGAATGGACGCGCCCTGTAGCGGCGCATTAAAGCGCGGGGGTGTGGTGGTTACGCGCAGCGTG  
ACCGCTACACTTGCCAGCGCCCTAGCGCCCGCTCCTTCGCTTTCTCCCTTCTTTCTCGCCACGTTCCCGGCTTTCC  
CGTCAAGCTCTAAATCGGGGGGCTYCCTTTAGGATCGAATTARTGCTTTACGCACCTCGACCCAAAAAACCTKGAATTA  
GGTGARATAGGCTA

>WT1.C1

GCTKKARGTWWWCMATCTTGTGCCTCAACATAAGATTGTCCACCCAGAATTGCTGGCAAGAGTCCAATTGCAAATTTGAC  
TTTCTCTGGCCAAGTAAGCATGTATTATTCTTCAAGATGGCCCATATTCCTGCAAGACCAATTTGAACACAATATCCAC  
ATAAAAAACAAGTTACTTCATTTGAAATTTGGCTGCACAAATTAGCTCACCATTTAATGGTGTGGTAGCACCTCAGGAAA  
ATCAAATCGACTGAACTCTCCAGGCTTATTTGGCATTGCAAATATCATTGAATGCTCCTTCCACTGCAACCGATCATTAA  
TTCTAGTTCTCCAAACAGGTTCTGCATATTTGGGTAAGCCCCAACTTAAGGTGGATCAAGAATCAATGTCACAAGTTAT  
TTGCTGCATCATAATGTATCTTAAAAAGAAACAAGAAGAATCATCTACATTCATGCTCATAAGAAATCAAAAAAGCACG  
GAACAAGATAAGGCAAATAATCGAATTCGCCGCGCCGCATGGCGGCCGGGAGCATGCGACGTCGGGCCCAATTCGCCCT  
ATAGTGAGTCGATTACAATTCAGTGGCGTCGTTTTACAACGTCGTGACTGGGAAAACCTGGCGTTACCCAACCTAAT  
CGCCTTGACGACATCCCCCTTCGCCAGCTGGCGTAATAGCGAAGAGGCCCGCACCGATCGCCCTTCCAACAGTTGCG  
CAGCCTGAATGGCGAATGGACGCGCCCTGTAGCGGCGCATTAAAGCGCGGGGGTGTGGTGGTTACGCGCAGCGTGACCGC  
TACACTTGCCAGCGCCCTAGCGCCCGCTCCTTCGCTTTCTTCTTCTTCTCGCCACGTTCCCGGCTTTCCCGTCAGC  
TCTAATCGGGGGGCTCCCTTAAGGGTTCCGATTAGTGCTTACGCACCTCGAACCCAAAAAACTTGATTWGAGGGGGKGA  
WGTGGG

>WT1.C2

CWRGTWWWCCATCTTGTGCCTCAACATAAGATTGTCCACCCAGAATTGCTGGCAAGAGTCCAATTGCAAATTTGACTTTC  
TCTGGCCAAGTAAGCATGTATTATTCTTCAAGATGGCCCATATTCCTGCAAGACCAATTTGAACACAATATCCACATA  
AAACAAGTTACTTCATTTGAAATTTGGCTGCACAAATTAGCTCACCATTTAATGGTGTGGTAGCACCTCAGGAAAAATCA  
AATCGACTGAACTCTCCAGGCTTATTTGGCATTGCAAATATCATTGAATGCTCCTTCCACTGCAACCGATCATTAAATTC  
TAGTTCTCCAAACAGGTTCTGCATATTTGGGTAAGCCCCAACTTAAGGTGGATCAAGAATCAATGTCACAAGTTATTTGC  
TGCATCATAATGTATCTTAAAAAGAAACAAGAAGAATCATCTACATTCATGCTCATAAGAAATCAAAAAAGCACGGAAC  
AAGATAAGGCAAAAATCGAATTCGCCGCGCCGCATGGCGGCCGGGAGCATGCGACGTCGGGCCCAATTCGCCCTATAGT  
GAGTCGATTACAATTCAGTGGCCGTCGTTTTACAACGTCGTGACTGGGAAAACCTGGCGTTACCCAACCTAATCGCCT  
TGCAGCACATCCCCCTTCGCCAGCTGGCGTAATAGCGAAGAGGCCCGCACCGATCGCCCTTCCAACAGTTGCGCAGCC  
TGAATGGCGAATGGACGCGCCCTGTAGCGGCGCATTAAAGCGCGGGGGTGTGGTGGTWACGCGCAGCGTGACCGCTAMAC  
TTGCCAGCGCCCTAGCGCCCGCTCCTTTCRCTTCTTCCCTTCTTCTCGCCACGTTCCCGAGCTTTCCCRGTCAAGCT  
CTAAATCRGGGGCTCCCKTTAGGGTTTCGAATTAGTGCTTTACGGCACCTCGAACCCAAAAAACTTGATTAGGGGGTGA  
WGGGKMTMCAARSARTAWG

>WT1.C3

ATTGTAAGKTAACCMRTKCWWTGRAGCCTCAACATAAGATTGTCCACCCAGAATTGCTGGCAAGAGTCCAATTGCMAWT  
TTGACTTTCTCTGGCCAAGTAAGCATGTATTATTCTTCAAGATGGCCCATATTCCTGCAAGACCAATTTGAACACAATA  
TCCACATAAAAAACAAGTTACTTCATTTGAAATTTGGCTGCACAAATTAGCTCACCATTTAATGGTGTGGTAGCACCTCA  
GGAAAATCAAATCGACTGAACTCTCCAGGCTTATTTGGCATTGCAAATATCATTGAATGCTCCTTCCACTGCAACCGATC  
ATTAATTCCTAGTTCTCCAAACAGGTTCTGCATATTTGGGTAAGCCCCAACTTAAGGTGGATCAAGAATCAATGTCACAA  
GTTATTTGCTGCATCATAATGTATCTTAAAAAGAAACAAGAAGAATCATCTACATTCATGCTCATAAGAAATCAAAAA

GCACGGAACAAGATAAGGCAAATAATCGAATCCCGCGGCCGCCATGGCGGCCGGGAGCATGCGACGTCGGGCCCAATTC  
GCCCTATAGTGAGTCGTATTACAATTCCTGCGCCGTCGTTTTACAACGTCGTGACTGGGAAAACCCCTGGCGTTACCCAAC  
TTAATCGCCTTGAGCACATCCCCCTTCGCCAGCTGGCGTAATAGCGAAGAGGCCCGCACCGATCGCCCTTCCAACAG  
TTGCGCAGCCTGAATGGCGAATGGACGCGCCCTGTAGCGGCGCATTAAAGCGCGCGGGGTGTGGTGGTTACGCGCAGCGTG  
ACCGCTACACTTGCCAGCGCCCTAGCGCCCGCTCCTTCGCTTCTCCCTTCTCCTTCTCGCCACGTTGCGGGCTTTCCCG  
TCAGCTCTAATCGGGGGCTCCCGTTAGGGTTCGATTAGTGCCTTAMCGCACCTCGACCCCAAAAACCTGAATTAGGGGTG  
AATGGATTA

>WT1.C4

ASKSKYKRSSGGKKRWWWCMMYMCTKTGGKKSCTCAACATAAGATTGTCCACCCAGAATTGCTGGCAAGAGTCCAATT  
GCAAATTTGACTTTCTCTGGCCAAGTAAGCATGTCATTATTCTTCAAGATGGCCCATATTCCTGCAAGACCAATTTGAAC  
ACAATATCCACATAAAAAACAAGTTACTTCAATTTGAAATTTGGCTGCACAAATTAGCTCACCATTTAATGGTGTGGTAGC  
ACCTCAGGAAAAACAATCGACTGAACTCTCCAGGCTTATTTGGCATTGCAAATATCATTGAATGCTCCTTCCACTGCAA  
CCGATCATTAAATTCCTAGTTCTCCAAACAGGTTCTGCATATTTGGGTAAGCCCCAACTTAAGGTGGATCAAGAATCAATG  
TCACAAGTTATTTGCTGCATCATAATGTATCTTAAAAAGAAACAAGAAGAATCATCTACATTCATGCTCATAAGAAATTC  
AAAAAAGCACGGAACAAGATAAGGCAAATAATCGAATCCCGCGGCCGCCATGGCGGCCGGGAGCATGCGACGTCGGGCC  
CAATTCGCCCTATAGTGAGTCGTATTACAATTCCTGCGCCGTCGTTTTACAACGTCGTGACTGGGAAAACCCCTGGCGTTA  
CCCAACTTAATCGCCTTGACGACATCCCCCTTCGCCAGCTGGCGTAATAGCGAAGAGGCCCGCACCGATCGCCCTCC  
CAACAGTTGCGCAGCCTGAATGGCGAATGGACGCGCCCTGTAGCGGCGCATTAAAGCGCGCGGGGTGTGGTGGTTACGCGC  
AGCGTGACCGCTACACTTGCCAGCGCCCTAGCGCCCGCTCCTTCGCTTCTCCCTTCTCCTTCTCGCMCGTTTCGCCG  
CTTCCCGTCAAGCTCTAAATCGGGGGCTCCCTTAGGGATCGATTTAGTGCCTTACGCACTCGACCCCAAAAAACCTG  
AATTTAGGGGTGGAAT

>WT2.C3

GGAAATTTGGKTCMCCYCYCAGAATTTGCTGGCAAGAGTCCAATTGCAMCMYTTTCACTTTCTCTGGCCAAGTAAGCAT  
GTCATTATTCTTCAASATGGCCCATATTCCTGCAAGACCAATTTGAACACAATATCCACATAAAAAACAAGTTACTTCAAT  
TGAAATTTGGCTGCMCAAATTAGCTCACCATTTAATGGTGTGGTAGCACCTCAGGAAAATCAAATCSACTGAACTCTCC  
AGGCTTATTTGGCATTGCAAATATCATTGAATGCTCCTTCCACTGCAACCGATCATTAAATTCCTAGTTCTCCAAACAGGT  
TCTGCATATTTGGGTAAGCCCCAACTTAAGGTGGATCAAGAATCAATGTCACAAGTTATTTGCTGCATCATAATGTATCT  
TAAAAAGAAACAAGAATCATCTACATTCATGCTCATAAGAAATTTAAAAAAGCACGGAACAAGATAAGGCAAATAAT  
CKAATTCGCGGCCCGCCATGGCGGCCGGGAGCATGCGACGTCGSGGCCAATTCGCCCTATAKTGAGTCGTATTACAAT  
TTCTGGCCGTCGTTTTACAACGTCGTGACTGGGAAAACCCCTG

>WT2.C4

CCYTKKMSRGTWWCCMTTCTTGTGCCTCAACATAAGATTGTCCACCCAGAATTGCTGGCAAGAGTCCAATTGCAAA  
TTTGACTTTCTCTGGCCAAGTAAGCATGTCATTATTCTTCAAGATGGCCCATATTCCTGCAAGACCAATTTGAACACAAT  
ATCCACATAAAAAACAAGTTACTTCAATTTGAAATTTGGCTGCACAAATTAGCTCACCATTTAATGGTGTGGTAGCACCTC  
AGGAAAATCAAATCGACTGAACTCTCCAGGCTTATTTGGCATTGCAAATATCATTGAATGCTCCTTCCACTGCAACCGAT  
CATTAAATTCCTAGTTCTCCAAACAGGTTCTGCATATTTGGGTAAGCCCCAACTTAAGGTGGATCAAGAATCAATGTCACA  
AGTTATTTGCTGCATCATAATGTATCTTAAAAAGAAACAAGAAGAATCATCTACATTCATGCTCATAAGAAATTCAAAA  
AGCACGGAACAAGATAAGGCAAATAATCGAATCCCGCGGCCGCCATGGCGGCCGGGAGCATGCGACGTCGGGCCCAAT  
CGCCCTATAGTGAGTCGTATTACAATTCCTGCGCCGTCGTTTTACAACGTCGTGACTGGGAAAACCCCTGGCGTTACCCAA  
CTTAATCGCCTTGACGACATCCCCCTTCGCCAGCTGGCGTAATAGCGAAGAGGCCCGCACCGATCGCCCTTCCAACA  
GTTGCGCAGCCTGAATGGCGAATGGACGCGCCCTGTAGCGGCGCATTAAAGCGCGCGGGGTGTGGTGGTTACGCGCAGCGT  
GACCGCTACACTTGCCAGCGCCCTAGCGCCCGCTCCTTCGCTTCTCCCTTCTCCTTCTCGCCACGTTGCGCGGCTTT  
CCGTCAAGCTCTAAATCGGGGGCTCCCTTAGGGTTCGAATTAGTGCCTTACGGCACCTCGAACCCCAAAAAACCTTGG  
TTWAG

>WT2.C6

AMYTKKSSGTTWWCCMATCCTTGTGCCTCAACATAAGATTGTCCACCCAGAATTGCTGGCAAGAGTCCAATTGCAAAT  
TGACTTTCTCTGGCCAAGTAAGCATGTCATTATTCTTCAAGATGGCCCATATTCCTGCAAGACCAATTTGAACACAAT  
CCACATAAAAAACAAGTTACTTCAATTTGAAATTTGGCTGCACAAATTAGCTCACCATTTAATGGTGTGGTAGCACCTCAG  
GAAAATCAAATCGACTGAACTCTCCAGGCTTATTTGGCATTGCAAATATCATTGAATGCTCCTTCCACTGCAACCGATCA  
TTAATTCCTAGTTCTCCAAACAGGTTCTGCATATTTGGGTAASCCCAACTTAAGGTGGATCAAGAATCAATGTCACAAG  
TTATTTGCTGCATCATAATGTATCTTAAAAAGAAACAAGAAGAATCATCTACATTCATGCTCATAAGAAATTCAAAAAAG  
CACGGAACAAGATAAGGCAAATAATCACTAGTGAATTCGCGGCCCGCTGCAGGTCGACCATATGGGAGAGCTCCCAACGC  
GTTGGATGCATAGCTTGTAGTATTCTATAGTGTACCTAAATAGCTTGGCGTAATCATGGTCATAGCTGTTTCTGTGTGA  
AATTGTTATCCGCTCACAATTCACACAACATACGAGCCGGAAGCATAAAGTGTAAAGCCTGGGGTGCCTAATGAGTGAG  
CTAACTCACAATTTGCGTTGCGCTACTGCCCCGTTCCAGTCGGGAAACCTGTCGTGCCAGCTGCATTAATGAATCG  
GCCAACGCGCGGGGAGAGGCGGTTGCGTATTGGGCGCTTTCGCTTCTCCTCGCTCACTGACTCGCTGCGCTCGGTCGTT  
GGCTGGCGGCGAGCGGTATCAGCTCACTCAAGGCGCTATACGGGCTATTCACAGATCAGGCATACGCGAGGAGAACATGG

KGAGGCCAAAAGAGTGGATA

>G1.C1

GYTKKMSGTWWACMATCTTGTGCCTCAACATAAGATTGTCCACCCAGAATTGCTGGCAAGAGTCCAATTGCAAATTTGAC  
TTTCTCTGGCCAAGTAAGCATGTCATTATTCTTCAAGATGGCCCATATTCCTGCAAGACCAATTTGAACACAATATCCAC  
ATAAAAACAAGTTACTTCATTTGAAATTTGGCTGCACAAATTAGCTCACCATTTAATGGTGTGGTAGCACCTCAGGAAA  
ATCAAATCGACTGAACTCTCCAGGCTTATTTGGCATTGCAAATATCATTGAATGCTCCTTCCACTGCAACCGATCATTAA  
TTCCTAGTTCTCCAAACAGGTTCTGCATATTTGGGTAAGCCCCAACTTAAGGTGGATCAAGAATCAATGTCACAAGTTAT  
TTGCTGCATCATAATGTATCTTAAAAAGAAACAAGAAGAATCATCTACATTCATGCTCATAAGAAATTCAAAAAGCACG  
GAACAAGATAAGGCAAATAATCGAATTCCCGCGGCCGCCATGGCGGCCGGGAGCATGCGACGTCGGGCCCAATTCGCCCT  
ATAGTGAGTCGTATTACAATTCAGTGGCCGTCGTTTTACAACGTCGTGACTGGGAAAACCTGGCGTTACCCAACCTAAT  
CGCCTTGACAGCACATCCCCCTTCGCCAGCTGGCGTAATAGCGAAGAGGCCCGCACCGATCGCCCTTCCCAACAGTTGCG  
CAGCCTGAATGGCGAATGGACGCGCCCTGTAGCGGCGCATTAAAGCGCGGCGGGTGTGGTGGTTACGCGCAGCGTGACCGC  
TACACTTGCAGCGCCCTAGCGCCCGCTCCTTTTCGCTTTCTTCCCTTCTCCTTCTCGCCACGTTCCCGGCTTCCCGTC  
AAGCTCTAATCGGGGGCTCCTTTAGGATTGCAATTTAGTGCTTTACGGCACCTCGAACCCCTAAAAAACCATGKA

>G1.C2

GMYYCTTKGTTGGSCCTMAMMATAAGATTGTCCACCCAGAATTGCTGGCAAGAGTCCAATTGCAAMYTTKACTTTCTCT  
GGCCAAGTAAGCATGTCATTATTCTTCAAGATGGCCCATATTCCTGCAAGACCAATTTGAACACAATATCCACATAAAAA  
CAAGTTACTTCATTTGAAATTTGGCTGCACAAATTAGCTCACCATTTAATGGTGTGGTAGCACCTCAGGAAAATCAAAT  
CGACTGAACTCTCCAGGCTTATTTGGCATTGCAAATATCATTGAATGCTCCTTCCACTGCAACCGATCATTAAATCCTAG  
TTCTCCAAACAGGTTCTGCATATTTGGGTAAGCCCCAACTTAAGGTGGATCAAGAATCAATGTCACAAGTTATTTGCTGC  
ATCATAATGTATCTTAAAAAGAAACAAGAAGAATCATCTACATTCATGCTCATAAGAAATTCAAAAAGCACGGAACAAG  
ATAAGGCAAATAATCGAATTCCCGCGGCCGCCATGGCGGCCGGGAGCATGCGACGTCGGGCCAATTCGCCCTATAGTGA  
GTCGTATTACAATTCAGTGGCCGTCGTTTTACAACGTCGTGACTGGGAAAACCTGGCGTTACCCAACCTAATCGCCTTG  
CAGCACATCCCCCTTCGCCAGCTGGCGTAATARCAGAGAGGCCCGCACCGATCGCCCTTCCCAACAGTTGCGCAGCCTG  
AATGGCGAATGGACGCGCCCTGTAGCGGCGCATTAAAGCGCGGCGGTGTGGTGGTTACGCGCAGCGTGACCGCTWMACTTG  
CCAGCGCCCTAGCGCCCGCTCCTTTTCGCTTTCTTCCCTCCTTCTCGCCACGTTCCCGGCTTCCCGTCAAGCTCTA  
AATCGGGGGCYTCCCTTTAGGTCCGAATTTARTGCGTTACGGCACCTCGACCCCAAAATACTWGGAYATGACGGGCG  
TGAMATC

>G1.C3

GTTWWMCCMWTTYCTTTGGTGGCCTCAACATAAGATTGTCCACCCAGAATTGCTGGCAAGAGTCCAATTGCAAATTTGAC  
TTTCTCTGGCCAAGTAAGCATGTCATTATTCTTCAAGATGGCCCATATTCCTGCAAGACCAATTTGAACACAATATCCAC  
ATAAAAACAAGTTACTTCATTTGAAATTTGGCTGCACAAATTAGCTCACCATTTAATGGTGTGGTAGCACCTCAGGAAA  
ATCAAATCGACTGAACTCTCCAGGCTTATTTGGCATTGCAAATATCATTGAATGCTCCTTCCACTGCAACCGATCATTAA  
TTCCTAGTTCTCCAAACAGGTTCTGCATATTTGGGTAAGCCCCAACTTAAGGTGGATCAAGAATCAATGTCACAAGTTAT  
TTGCTGCATCATAATGTATCTTAAAAAGAAACAAGAAGAATCATCTACATTCATGCTCATAAGAAATTCAAAAAGCACG  
GAACAAGATAAGGCAAATAATCGAATTCCCGCGGCCGCCATGGCGGCCGGGAGCATGCGACGTCGGGCCCAATTCGCCCT  
ATAGTGAGTCGTATTACAATTCAGTGGCCGTCGTTTTACAACGTCGTGACTGGGAAAACCTGGCGTTACCCAACCTAAT  
CGCCTTGACAGCACATCCCCCTTCGCCAGCTGGCGTAATARCAGAGAGGCCCGCACCGATCGCCCTTCCCAACAGTTGC  
GCAGCCTGAATGGCGAATGGACGCGGCCCTGTAGCGGCGCATTAAAGCGCGGCGGGTGTGGTGGGTTACGCGCAGCGTGA  
CCGCTACACTTGACGCGCCCTAGCGCCCGCTCCTTTTCGCTTTCTCCTTCTCCTTCTCGCAMGTTCCCGGCTTCCCGTCA  
AGCTCTAARTCGGGGGCTCCCTTTAGGGTTCGAATAGTGCTTACGGCACCTCGACCCMAAAAACTKGAAATTAAGGGGG  
GTGGAT

>G2.C1

CTKKWRRGKTWWWAMCMATCTTGTGCCTCAACATAAGATTGTCCACCCAGAATTGCTGGCAAGAGTCCAATTGCAAATTT  
GACTTTCTCTGGCCAAGTAAGCATGTCATTATTCTTCAAGATGGCCCATATTCCTGCAAGACCAATTTGAACACAATATC  
CACATAAAAAACAAGTTACTTCATTTGAAATTTGGCTGCACAAATTAGCTCACCATTTAATGGTGTGGTAGCACCTCAGG  
AAAATCAAATCGACTGAACTCTCCAGGCTTATTTGGCATTGCAAATATCATTGAATGCTCCTTCCACTGCAACCGATCAT  
TAATTCCTAGTTCTCCAAACAGGTTCTGCATATTTGGGTAAGCCCCAACTTAAGGTGGATCAAGAATCAATGTCACAAGT  
TATTTGCTGCATCATAATGTATCTTAAAAAGAAACAAGAAGAATCATCTACATTCATGCTCATAAGAAATTCAAAAAGC  
ACGGAACAAGATAAGGCAAATAATCGAATTCCCGCGGCCGCCATGGCGGCCGGGAGCATGCGACGTCGGGCCCAATTCGC  
CCTATAGTGAGTCGTATTACAATTCAGTGGCCGTCGTTTTACAACGTCGTGACTGGGAAAACCTGGCGTTACCCAACCT  
AATCGCCTTGACAGCACATCCCCCTTCGCCAGCTGGCGTAATAGCGAAGAGGCCCGCACCGATCGCCCTTCCCAACAGTT  
GCGCAGCCTGAATGGCGAATGGACGCGGCCCTGTAGCGGCGCATTAAAGCGCGGCGGGTGTGGTGGGTTACGCGCAGCGTGA  
CGCTACACTTGCCAGCGCCCTAGCGCCCGCTCCTTTTCGCTTTCTCCTTCTCCTTCTCGCCACGTTCCCGGCTTCCCGTC  
AAGCTCTAAATCGGGGGCTCCCTTTAGGTTTCGATTAGTGCTTACGCACCTCGAACCCCAAAAAAATTKGAATTWACGA  
GT

>G2.C2



CCMAMAMMYYYTTTTWGAMCTTTYTCTCTMGGCCAAGTAAGCATGTCATTATTCTTCMMGATGGCCCATATTCCTGCAAG  
ACCAATTTGAACACAATATCCACATAAAAAACAAGTACTTCATTTGAAATTTGGCTGCACAAATTAGCTCACCATTTAAT  
GGTGTGGTAGCACCTCAGGAAAATCAAATCGACTGAAGTCTCCAGGCTTATTTGGCATTGCAAATATCATTGAATGCTC  
CTTCCACTGCAACCGATCATTAAATCCTAGTTCTCCAAAAGGTTCTGCATATTTGGGTAAGCCCCAACTTAAGGTGGAT  
CAAGAATCAATGTCACAAGTTATTTGCTGCATCATAATGTATCTTAAAAAGAAACAAGAAGAATCATCTACATTCATGCT  
CATAAGAAATTCAAAAAGCACGGAACAAGATAAGGCCAAATAATCGAATTCGCCGCGGCCATGGCGGCCGGGAGCATG  
CGACGTCGGGCCAATTCGCCCTATAGTGAGTCGTATTACAATTCAGTGGCCGTCGTTTTACAACGTCGTGACTGGGAAA  
ACCCTGGCRTTACCAACTTAATCGCCTTGASCACATCCCCTTCGCCAGCTGGCGTAATAKCGAAGAGGMCCGCACCG  
ATCGCCCTTCCACMGTTGCGCAGCCTGAATGGCGAAGGGACSCGCCGTARCGGCGCATTAGGCGCGGGGGWTGG  
>G2.C3

AKGGCCCCTYMAACAWTAARATTTGTCCACCCAGAATTGCTGGCAAGAGTCCAATTGCAAATTTGACTTTCTCTGGCCAA  
GTAAGCATGTCATTATTCTTCAAGATGGCCCATATTCCTGCAAGACCAATTTGAACACAATATCCACATAAAAAACAAGT  
ACTTCATTTGAAATTTGGCTGCACAAATTAGCTCACCATTTAATGGTGTGGTAGCACCTCAGGAAAATCAAATCGACTG  
AACTCTCCAGGCTTATTTGGCATTGCAAATATCATTGAATGCTCCTTCCACTGCAACCGATCATTAAATCCTAGTTCTCC  
AAACAGGTTCTGCATATTTGGGTAASCCCAACTTAAGGTGGATCAAGAATCAATGTCACAAGTTATTTGCTGCATCATA  
ATGTATCTTAAAAAGAAACAAGAAGAATCATCTACATTCATGCTCATAAGAAATTCAAAAAGCACGGAACAAGATAAGG  
CAAATAATCGAATTCGCCGCGGCCATGGCGGCCGGGAGCATGCGACGTCGGGCCAATTCGCCCTATAGTGAGTCGTA  
TTACAATTCAGTGGCCGTCGTTTTACAACGTCGTGACTGGGAAAACCCTGGCGTTACCCAATTAATCGCCTTGCAGCAC  
ATCCCCCTTCGCCAGCTGGCGTAATAGCGAAGAGGCCCGCACCGATCGCCCTTCCMAACAGTTGCGCAGCCTGAATGGC  
GAATGGACGCGCCCTGTAGCGGCGCATTAAAGCGCGGGGGTGTGGTGGTTACGCGCAGCGTGACCGCTACACTTGCCAGC  
GCCCTAGCGCCGCTCCTTTCGCTTTCTCCCTTCTTCTCGCCACGTTGCGCGCTTCCCGRTCAAGCTCTAAATCGG  
GGGGCTCCCGTWAGGCTTCCGATTAGTGCTTTACCGACACCTCGAACCCCAAAAACCTGAATTAGGGTGGAATGGGCTAY  
A

>G2.C4

TKKKWMSGTTWWWCCMATCTTGTGCCTCAACATAAGATTGTCCACCCAGAATTGCTGGCAAGAGTCCAATTGCASATTTG  
ACTTTCTCTGGCCAAGTAAGCATGTCATTATTCTTCAAGATGGCCCATATTCCTGCAAGACCAATTTGAACACAATATCC  
ACATAAAAAACAAGTACTTCATTTGAAATTTGGCTGCACAAATTAGCTCACCATTTAATGGTGTGGTAGCACCTCAGGA  
AAATCAAATCGACTGAAGTCTCCAGGCTTATTTGGCATTGCAAATATCATTGAATGCTCCTTCCACTGCAACCGATCATT  
AATTCCTAGTTCTCCAAACAGGTTCTGCATATTTGGGTAAGCCCCAACTTAAGGTGGATCAAGAATCAATGTCACAAGTT  
ATTTGCTGCATCATAATGTATCTTAAAAAGAAACAAGAAGAATCATCTACATTCATGCTCATAAGAAATTCAAAAAGCA  
CGGAACAAGATAAGGCCAAAAATCGAATTCGCCGCGGCCATGGCGGCCGGGAGCATGCGACGTCGGGCCAATTCGCC  
TATAGTGAGTCGATTACAATTCAGTGGCCGTCGTTTTACAACGTCGTGACTGGGAAAACCCTGGCGTTACCCAATTA  
TCGCCTTGAGCACATCCCCCTTCGCCAGCTGGCGTAATAGCGAAGAGGCCCGCACCGATCGCCCTTCCCAACAGTTGC  
GCAGCCTGAATGGCGAATGGACGCGCCCTGTAGCGGCGCATTAAAGCGCGGGGGTGTGGTGGTTACGCGCAGCGTGACCG  
CTACACTTGCCAGCGCCCTAGCGCCGCTCCTTTCGCTTTCTTCCCTTCTTCTCGCCACGTTGCGCGGCTTCCCGTCA  
AAGCTCTAAATCGGGGGGGCTCCCTTAGGGATCGAATTTAGTGCTTTACGGCACCTCGACCCCAAAAAAAMTTTGAAG  
T

>G3.C1

TRGGTTWWWCCMATCTTGTGCCTCAACATAAGATTGTCCACCCAGAATTGCTGGCAAGAGTCCAATTGCAAATTTGACTT  
TCTCTGGCCAAGTAAGCATGTCATTATTCTTCAAGATGGCCCATATTCCTGCAAGACCAATTTGAACACAATATCCACAT  
AAAAACAAGTACTTCATTTGAAATTTGGCTGCACAAATTAGCTCACCATTTAATGGTGTGGTAGCACCTCAGGAAAAAT  
CAAATCGACTGAAGTCTCCAGGCTTATTTGGCATTGCAAATATCATTGAATGCTCCTTCCACTGCAACCGATCATTAAAT  
CCTAGTTCTCCAAACAGGTTCTGCATATTTGGGTAAGCCCCAACTTAAGGTGGATCAAGAATCAATGTCACAAGTTATTT  
GCTGCATCATAATGTATCTTAAAAAGAAACAAGAAGAATCATCTACATTCATGCTCATAAGAAATTCAAAAAGCACGGA  
ACAAGATAAGGCCAAATAATCGAATTCGCCGCGGCCATGGCGGCCGGGAGCATGCGACGTCGGGCCAATTCGCCCTAT  
AGTGAGTCGATTACAATTCAGTGGCCGTCGTTTTACAACGTCGTGACTGGGAAAACCCTGGCGTTACCCAATTAATCG  
CCTTGACGACATCCCCCTTCGCCAGCTGGCGTAATAGCGAAGAGGCCCGCACCGATCGCCCTTCCCAACAGTTGCGCA  
GCCTGAATGGCGAATGGACGCGCCCTGTAGCGGCGCATTAAAGCGCGGGGGTGTGGTGGTTACGCGCAGCGTGACCGCTA  
CACTTGCCAGCGCCCTAGCGCCGCTCCTTTCGCTTTCTTCCCTTCTTCTCGCCACGTTGCGCGGCTTCCCGTCAA  
GCTCTAATCGGGGGGCTCCCTTAGGGTTCGATTAGTGCTTTACGGCACCTCGACCCCAAAAAAAMTTTGAAG  
>G3.C2

CTTYCYTTTGGTKGCCTCAACATAAGATTGTCCACCCAGAATTGCTGGCAAGAGTCCAATTGCAAATTTGACTTTCTCTG  
GCCAAGTAAGCATGTCATTATTCTTCAAGATGGCCCATATTCCTGCAAGACCAATTTGAACACAATATCCACATAAAAAAC  
AAGTACTTCATTTGAAATTTGGCTGCACAAATTAGCTCACCATTTAATGGTGTGGTAGCACCTCAGGAAAATCAAATC  
GACTGAAGTCTCCAGGCTTATTTGGCATTGCAAATATCATTGAATGCTCCTTCCACTGCAACCGATCATTAAATCCTAGT  
TCTCCAAACAGGTTCTGCATATTTGGGTAAGCCCCAACTTAAGGTGGATCAAGAATCAATGTCACAAGTTATTTGCTGCA  
TCATAATGTATCTTAAAAAGAAACAAGAAGAATCATCTACATTCATGCTCATAAGAAATTCAAAAAGCACGGAACAAGA

TAAGGCAAATAAATCGAATTCGCCGCGCCGCATGGCGGCCGGGAGCATGCGACGTCGGGCCCAATTCGCCCTATAGTGA  
GTCGTATTACAATCACTGGCCGTCGTTTTACAACGTCGTGACTGGGAAAACCTGGCGTTACCCAACCTAATCGCCTTG  
CAGCACATCCCCCTTCGCGAGCTGGCGTAATAGCGAAGAGGCCCGCACCGATCGCCCTTCCAACAGTTGCGCAGCCTG  
AATGGCGAATGGACGCGCCCTGTAGCGRCGCATTAAGCGCGCGGGTGTGGTGGTTACGCGCAGCGTGACCGCTACACT  
GCCAGCGCCCTAGCGCCGCTCCTTTCGCTTCTTCCCTCCCTTCTCGGCACGTTCSGCGGCTTCCCCGTCAAGMTCT  
AAATCGGGGGCCTCCCTTAAAGGGTCCGATTAGAGCTTACGGCACCTCGAACCCAAAAACGTTGATAGGGTATGGTCA  
CGTAGAKGGGCTCTCAGC

>G3.C3

CTKRSCCTYMAACMATAAARAAWTGTTCCACCCAGAATTGCTGGCAAGAGTCCAATTGCAMMTTGTACTTTCTGGCC  
AAGTAAGCATGTCATTATTCTTCAMCSATGGCCCATATTCTGCAAGACCAATTTGAACACAATATCCACATAAAAAACA  
GTTACTTCATTTGAAATTTGGCTGCACAAATTAGCTCACCATTTAATGGTGTGGTAGCACCTCAGGAAAATCAAATCGA  
CTGAACTCTCCAGGCTTATTTGGCATTGCAAATATCATTGAATGCTCCTTCCACTGCAACCGATCATTAAATCCTAGTTC  
TCCAAACAGTTCTGCATATTTGGGTAASCCCAACTTAAGGTGGATCAAGAATCAATGTCACAAGTTATTTGCTGCATC  
ATAATGTATCTTAAAAAGAAAACAAGAAGATCATCTACATTATGCTCATAAGAAATTCAAAAAAGCACGGAACAAGATA  
AGGCAAATAATCGAATTCGCCGCGCCGCATGGCGGCCGGRAGCATGCGACGTCGGGCCCAATTCGCCCTATAGTGAGTC  
GTATTACAATCACTGGCCGTCGTTTTACAACGTCGTGACTGGGAAAACCTGGCGTTACCCAACCTAATCGCCTTGAS  
CACATCCCCCTTTCGCCAGCTGGCGTAATAGCSAAGAGGCCCGCACCGATCGCCCTTCCAACAGTTGCSASCCTGAAT

>G3.C4

GKKTWKYMCMTYCTTGGKTGGCCTCMACATAAGATTGTCCACCCAGAATTGCTGGCAAGAGTCCAATTGCAAATTTGA  
CTTTCTCTGGCCAAGTAAGCATGTCATTATTCTTCAAGATGGCCCATATTCTGCAAGACCAATTTGAACACAATATCCA  
CATAAAAAACAAGTTACTTCATTTGAAATTTGGCTGCACAAATTAGCTCACCATTTAATGGTGTGGTAGCACCTCAGGAA  
AATCAAATCGACTGAACTCTCCAGGCTTATTTGGCATTGCAAATATCATTGAATGCTCCTTCCACTGCAACCGATCATT  
ATTCCTAGTTCTCCAAACAGGTTCTGCATATTTGGGTAASCCCAACTTAAGGTGGATCAAGAATCAATGTCACAAGTTA  
TTTGTGTCATCATAATGTATCTTAAAAAGAAAACAAGAAGATCATCTACATTATGCTCATAAGAAATTCAAAAAAGCAC  
GGAACAAGATAAGGCAAAAATCGAATTCGCCGCGCCGCATGGCGGCCGGGAGCATGCGACGTCGGGCCCAATTCGCCCT  
ATAGTGAGTCGTATTACAATCACTGGCCGTCGTTTTACAACGTCGTGACTGGGAAAACCTGGCGTTACCCAACCTAAT  
CGCCTTGACGACATCCCCCTTTCGCCAGCTGGCGTAATAGCGAAGAGGCCCGCACCGATCGCCCTTCCAACAGTTGCG  
CAGCCTGAATGGCGAATGGACGCGCCCTGTAGCGGCGCATTWARGCGCGCGGGTGTGGTGGTTACGCGCAGCGTGACCG  
CTACACTTGCCAGCGCCCTAGCGCCGCTCCTTTCGCTTCTTCCCTTCTTCTCGCCACGTTTCGCCGCTTCCCCGTC  
AAGCTYAATCGGGGGCTCCGTTAGGTTCCGATTTAGTGCTTAACGGCACCTCGAACCCAAAAAACCTGTGAATWAA  
GGGGGTSTG

>S1.C3

GCCAMMMMMCYCTTTTTGAMCTKTTCTCTGGCCAAGTAAGCATGTCATTAATTCTTCMMSYATGGCCCATATTCTGCAA  
GACCAATTTGAACACAATATCCACATAAAAAACAAGTTACTTCATTTGAAATTTGGCTGCACAAATTAGCTCACCATTTAA  
TGGTGTGGTAGCACCTCAGGAAAATCAAATCGACTGAACTCTCCAGGCTTATTTGGCATTGCAAATATCATTGAATGCT  
CCTTCCACTGGCAACCGATCATTAAATCCTAGTTCTCCAAACAGGTTCTGCATATTTGGGTAAGCCCAACTTAAGGTGG  
ATCAAGAATCAATGTCACAAGTTATTTGCTGCATCATAATGTATCTTAAAAAGAAAACAAGAAGATCATCTACATTATG  
CTCATAAGAAATTCAAAAAAGCACGGAACAAGATAAGGCAAAAATCGAATTCGCCGCGCCGCATGGCGGCCGGGAGCAT  
GCGACGTCGGGCCAATTCGCCCTATAGTGAGTCGTATTACAATCACTGGCCGTCGTTTTACAACGTCGTGACTGGRAA  
AACCTGGCGTTACCCAACCTAATCGCCTTGACGACATCCCCCTTTCGCCAGCTGGCGTAATAGCGAAGAGGCCCGCAC  
CGATCSYCCTTCCAAAYAGTTGCGCAGCCTGAATGGCGAATGGACGCGCCTWGTAGCRGCGCATAAGCGCGRCGGGTGTG  
GWGGTTACGCGCAGCGTGWCCGCTACACTTGCRYGCTAACGCCRCCTATTCTACTCCCTCTTMTYGCCMCGTTC  
GACGGCATCCCGTCAAGCTYAAATCGGGGTTCTTAGGATCGATATTGCCTTACCGGACCTYRACTCCAAAACCTGATAGG  
GTGATGSTMCG

>S1.C4

GTCCCTTKGKTGGSCCTMAACATAAGGATTGTCCACCCAGAATTGCTGGCAAGAGTCCAATTGCAAATTTGACTTTCTC  
TGGCCAAGTAAGCATGTCATTATTCTTCAAGATGGCCCATATTCTGCAAGACCAATTTGAACACAATATCCACATAAAA  
ACAAGTTACTTCATTTGAAATTTGGCTGCACAAATTAGCTCACCATTTAATGGTGTGGTAGCACCTCAGGAAAATCAA  
TCGACTGAACTCTCCAGGCTTATTTGGCATTGCAAATATCATTGAATGCTCCTTCCACTGCAACCGATCATTAAATCCTA  
GTTCTCCAAACAGGTTCTGCATATTTGGGTAAGCCCAACTTAAGGTGGATCAAGAATCAATGTCACAAGTTATTTGCTG  
CATCATAATGTATCTTAAAAAGAAAACAAGAAGATCATCTACATTATGCTCATAAGAAATTCAAAAAAGCACGGAACAA  
GATAAGGCAAATAATCGAATTCGCCGCGCCGCATGGCGGCCGGGAGCATGCGACGTCGGGCCAATTCGCCCTATAGTG  
AGTCGTATTACAATCACTGGCCGTCGTTTTACAACGTCGTGACTGGGAAAACCTGGCGTTACCCAACCTAATCGCCTT  
GCAGCACATCCCCCTTTCGCCAGCTGGCGTAATAGCGAAGAGGCCCGCACCGATCGCCCTTCCAACAGTTGCGCAGCCT  
GAATGGCGAATGGACGCGCCCTGTAGCGGCGCATTAAAGCGCGCGGGTGTGGTGGTTACGCGCAGCGTGACCGCTACACT  
TGCCAGCGCCCTAGCGCCGCTCCTTTCGCTTCTTCTTCTTCTCGCACGTTTCGCCGCTTCCCCGTGAGCTCTAA  
ATCGGGGGCTCCTTAGGGTCAATAGTGCCTTACCAGCACCTCGACCCCTAAAACCTTGAATTAAGGGGKGRATA

>S2.C1

AYKKKKRGGTTWWCMTCTTGGTGCCTCAACATAAGATTGTCCACCCAGAATTGCTGGCAAGAGTCCAATTGCAAATTTGA  
CTTTCTCTGGCCAAGTAAGCATGTCATTATTCTTCAAGATGGCCCATATTCTGCAAGACCAATTTGAACACAATATCCA  
CATAAAAAACAAGTTACTTCATTTGAAATTTGGCTGCACAAATTAGCTCACCATTAATGGTGCTGGTAGCACCTCAGGAA  
AATCAAATCGACTGAACTCTCCAGGCTTATTTGGCATTGCAAATATCATTGAATGCTCCTTCCACTGCAACCGATCATT  
ATTCTAGTTCTCCAAACAGGTTCTGCATATTTGGGTAAGCCCCAACTTAAGGTGGATCAAGAATCAATGTCACAAGTTA  
TTGCTGCATCATAATGTATCTTAAAAAGAAACAAGAAGAATCATCTACATTATGCTCATAAGAAATTCAAAAAGCAC  
GGAACAAGATAAGGCAAATAATCGAATTCGCCGCGCCGCCATGGCGGCCGGGAGCATGCGACGTCGGGCCAATTCGCC  
TATAGTGAGTCGATTACAATCACTGGCCGTCGTTTTACAACGTCGTGACTGGGAAAACCTGGCGTTACCCAACCTAA  
TCGCCTTGAGCACATCCCCCTTTCGCCAGCTGGCGTAATAGCGAAGAGGCCCGCACCGATCGCCCTTCCCAACAGTTGC  
GCAGCCTGAATGGCGAATGGACGCGCCCTGTAGCGGCGCATTAAAGCGCGCGGGTGTGGTGGTTACGCGCAGCGTGACCG  
CTACACTTGCCAGCGCCCTAGCGCCGCTCCTTTCGCTTCTTCCCTTCTTCTCGCACGTTCCGGCTTTCCTCGTCA  
GCTCTAAATCGGGGGGCTCCCTTAGGGATCGAATTAGTGCTTACGGCMACCTCGAACCCCAAAAACTKGAATTAGGGG  
KKAATW

>S2.C2

GKKWKYRRGTTWWCMTCTTTGTGGCCTCAACATAAGATTGTCCACCCAGAATTGCTGGCAAGAGTCCAATTGCAAAT  
TTGACTTTCTCTGGCCAAGTAAGCATGTCATTATTCTTCAAGATGGCCCATATTCTGCAAGACCAATTTGAACACAATA  
TCCACATAAAAAACAAGTTACTTCATTTGAAATTTGGCTGCACAAATTAGCTCACCATTAATGGTGCTGGTAGCACCTCA  
GAAAATCAAATCGACTGAACTCTCCAGGCTTATTTGGCATTGCAAATATCATTGAATGCTCCTTCCACTGCAACCGATC  
ATTAATCCTAGTTCTCCAAACAGGTTCTGCATATTTGGGTAAGCCCCAACTTAAGGTGGATCAAGAATCAATGTCACAA  
GTTATTTGCTGCATCATAATGTATCTTAAAAAGAAACAAGAAGAATCATCTACATTATGCTCATAAGAAATTCAAAAA  
GCACGGAACAAGATAAGGCAAATAATCGAATTCGCCGCGCCGCCATGGCGGCCGGGAGCATGCGACGTCGGGCCAATTC  
GCCCTATAGTGAGTCGATTACAATCACTGGCCGTCGTTTTACAACGTCGTGACTGGGAAAACCTGGCGTTACCCAAC  
TTAATCGCCTTGAGCACATCCCCCTTTCGCCAGCTGGCGTAATAGCGAAGAGGCCCGCACCGATCGCCCTTCCCAACAG  
TTGCGCAGCCTGAATGGCGAATGGACGCGCCCTGTAGCGGCGCATTAAAGCGCGCGGGTGTGGTGGTTACGCGCAGCGTG  
ACCGCTACACTTGCCAGCGCCCTAGCGCCGCTCCTTTCGCTTCTTCCCTTCTTCTCGCACGTTCCGGGCTTTCCTCC  
CGTCAGCTCTAAATCGGGGGGCTCCCTTAGGTTCCGAATTAGTGCTTACGGCACCTCGACCCCAAAAAAMCTTTG  
GAKTTG

>S2.C3

TCMWWKGGTGGCCYTCMWCATAAGATTGTCCACCCAGAATTGCTGGCAAGAGTCCAATTGCAAATTTGACTTTCTCTGGC  
CAAGTAAGCATGTCATTATTCTTCAAGATGGCCCATATTCTGCAAGACCAATTTGAACACAATATCCACATAAAAAACA  
GTTACTTCATTTGAAATTTGGCTGCACAAATTAGCTCACCATTAATGGTGCTGGTAGCACCTCAGGAAAATCAAATCGA  
CTGAACTCTCCAGGCTTATTTGGCATTGCAAATATCATTGAATGCTCCTTCCACTGCAACCGATCATTAAATCCTAGTTC  
TCCAAACAGGTTCTGCATATTTGGGTAAGCCCCAACTTAAGGTGGATCAAGAATCAATGTCACAAGTTATTTGCTGCATC  
ATAATGTATCTTAAAAAGAAACAAGAAGAATCATCTACATTATGCTCATAAGAAATTCAAAAAGCACGGAACAAGATA  
AGGCAAATAATCGAATTCGCCGCGCCGCCATGGCGGCCGGGAGCATGCGACGTCGGGCCAATTCGCCCTATAGTGAGTC  
GTATTACAATCACTGGCCGTCGTTTTACAACGTCGTGACTGGGAAAACCTGGCGTTACCCAACCTAATCGCCTTGAG  
CACATCCCCCTTTCGCCAGCTGGCGTAATAGCGAAGAGGCCCGCACCGATCGCCCTTCCCAACAGTTGCGCAGCCTGAAT  
GGCGAATGGACGCGCCCTGTAGCGGCGCATTAAAGCGCGCGGGTGTGGTGGTTACGCGCAGCGTGACCGTACACTTGCC  
AGCGCCCTAGCGCCGCTCCTTTCGCTTCTTCCCTTCTTCTCGCACGTTCCGGGCTTTCCTCGTCAAGCTCTAAATC  
GGGGGGCTCCCTTAGGTTCCGATTAGTGCTTACGGCACTCGAACCCAAAACCTTGATAAGTGAATGGTACAGTAGTGG  
GACCAATCKACCCCGCT

>S2.C4

CMAACAACCTTATTGAACTTTGCTCCTGGCCAAGTAAGCATGTCATTATTCTTCCMCCSATWGGCCCATATTCCTGCAA  
GACCAATTTGAACACAATATCCACATAAAAAACAAGTTACTTCATTTGAAATTTGGCTGCMCAAATTAGCTCACCATTTAA  
TGGTGCTGGTAGCACCTCAGGAAAATCAAATCGACTGAACTCTCCAGGCTTATTTGGCATTGCAAATATCATTGAATGCT  
CCTTCCACTGCAACCGATCATTAAATCCTAGTTCCTCAAACAGGTTCTGCATATTTGGGTAAGCCCCAACTTAAGGTGGA  
TCAAGAATCAATGTCACAAGTTATTTGCTGCATCATAATGTATCTTAAAAAGAAACAAGAAGAATCATCTACATTATGCT  
TCATAAGAAATTCAAAAAGCACGGAACAAGATAAGGMAAAAATCGAATTCGCCGCGCCGCCATGGCGGCCGGGAGCATG  
CGACGTCGGGCCAATTCRCCCTATAGTGAGTCGYATTACAATCACTGGCCGTCGTTTTACAACGTCGTGACTGGGAAA  
ACCCTGGCGTTACCCAACCTAATCGCCTTGACGACATCCCCCTTTCGCCAGCTGGCGTAATAGCGAAGAGGCCCGCAC  
GATCGCCCTTCCCAACAGTTGCGCAGCCTGAATGGCGAATGGACGCGCCCTGTAGCGGCGCATTAAAGCGCGCGGGTGTG  
GKGGTTACGCGCAGCRTGACCRCTWCAMTTGCCAGCGCCCTAGCGCMCGCTCCTTCGCTTYCTCCCTTCTTWCACG  
TTCGCCGCTTTCCTCAGCTCWAATCGGGGGCTCCTTWARGGATTGATTAATGCTACGCACCYCSACCCAAAAA  
ACTGRATTAARGGKWATGTTACACGWAGKGGGCCM

>S3.C1

CGTWTWCCMMTTCCTTTGTGCCTCAACATAAGATTGTCCACCCAGAATTGCTGGCAAGAGTCCAATTGCAAATTTGACTT

TCTCTGGCCAAGTAAGCATGTCATTATTCTTCAAGATGGCCCATATTCTGCAAGACCAATTTGAACACAATATCCACAT  
AAAAACAAGTACTTCATTTGAAATTTGGCTGCACAAATTAGCTCACCATTTAATGGTGTGGTAGCACCTCAGGAAAAAT  
CAAATCGACTGAACTCTCCAGGCTTATTTGGCATTGCAAATATCATTGAATGCTCCTTCCACTGCAACCGATCATTAAAT  
CCTAGTTCTCAAACAGGTTCTGCATATTTGGGTAAGCCCCAACTTAAGGTGGATCAAGAATCAATGTCACAAGTTATTT  
GCTGCATCATAATGTATCTTAAAAAGAAACAAGAAGAATCATCTACATTGCTCATAAGAAATTTAAAAAAGCACGGA  
ACAAGATAAGGCAAATAATCGAATTTCCCGCGGCCGATGGCGGCCGGGAGCATGCGACGTGCGGCCCAATTCGCCCTAT  
AGTGAGTCGTATTACAATTCAGTGGCCGTCGTTTTACAACGTCGTGACTGGGAAAAACCTGGCGTTACCCAATTAATCG  
CCTTGCAGCACATCCCCCTTTCGCCAGCTGGCGTAATAGCGAAGAGGCCCGCACCGATCGCCCTTCCCAACAGTTGCGCA  
GCCTGAATGGCGAATGGACGCGCCCTGTAGCGGCGCATTAAAGCGCGGCGGGTGTGGTGGTTACGCGCAGCGTGACCGCTA  
CACTTGCCAGCGCCCTAGCGCCGCTCCTTTCGCTTTCTCCCTTCTTCTCGCCACGTTGCGCCGGCTTTCCCGGTCA  
AGCTCTAATCGGGGGGCTCCCTTAAAGGATCGATTTAGTGCTTTACGGCACCCCTYCGACCAAAAACTGGAATTAGGKGA  
TGGTTCCACGTATACTGTGCCCTCACYACT

>S3.C3

GAAGKTTCCMAATTTTGGCAAATTTGACTTTCTCTGGCCAAGTAAGCATGTCATTATTCTTCAAGATGGCCCATATTCTGCAAGACCAATTTGAACACAATATCCACATAAAAAACAAGTTACTTCATTTGAAATTTGGCTGCACAAATTAGCTCACC  
ATTTAATGGTGTGGTAGCACCTCAGGAAAAATCAAATCGACTGAACTCTCCAGGCTTATTTGGCATTGCAAATATCATTG  
AATGCTCCTTCCACTGCAACCGATCATTAAATCCTAGTTCTCAAACAGGTTCTGCATATTTGGGTAAGCCCCAACTTAA  
GGTGGATCAAGAATCAATGTCACAAGTTATTTGCTGCATCATAATGTATCTTAAAAAGAAACAAGAAGAATCATCTACAT  
TCATGCTCATAAGAAATTTAAAAAAGCACGGAACAAGATAAGGCAAATAATCGAATTTCCCGCGGCCGATGGCGGCCGG  
GAGCATGCGACGTGCGGCCCAATTCGCCCTATAGTGAGTCGTATTACAATTCAGTGGCCGTCGTTTTACAACGTCRTGAC  
TGGRAAAACCTGGCGTTACCCAATTAATCGCCTTGCAGCACATCCCCCTTTCGCCAGCTGGCGTAATAGCGAAGAGGC  
CCCGCACCGATCGCCCTTCCCAACAGTTGCGCAGCCTGAATGGCGAATGGACGCGCCCTGTAGCGGCGCATTAAAGCGCG  
GCGGGTGTGGTGGTTACGCGCAGCGTGACCGGCTACACTTGCARCGCCCTAGCGCCCGCTCCTTTCGCTTTCTCCCTTCC  
TTTMTCGCMMSTTCRCCGGCTTTCCCGTCAAGCATCWAATCGGGGCTCCTTWRGGTCCGATTWGKSCCTACGGCMCC  
TYCGACMCCMAAACTGGATGAGGGKGAKTGATCACGTYGATGRGCATCGCCCKRGATARMCGGGTTCTTCGCCCTMKG  
ARCGT

>S4.C1

GKKKKRRGKTTTWCMTTCTTTGGTGCCTCAACATAAARGATTGTCCACCCAGAATTGCTGGCAAGAGTCCAATTGCAAA  
TTTACTTTCTCTGGCCAAGTAAGCATGTCATTATTCTTCAAGATGGCCCATATTCTGCAAGACCAATTTGAACACAAT  
ATCCACATAAAAAACAAGTTACTTCATTTGAAATTTGGCTGCACAAATTAGCTCACCATTTAATGGTGTGGTAGCACCTC  
AGGAAAATCAAATCGACTGAACTCTCCAGGCTTATTTGGCATTGCAAATATCATTGAATGCTCCTTCCACTGGCAACCGA  
TCATTAATTCCTAGTTCTCAAACAGGTTCTGCATATTTGGGTAAGCCCCAACTTAAGGTGGATCAAGAATCAATGTCAC  
AAGTTATTTGCTGCATCATAATGTATCTTAAAAAGAAACAAGAAGAATCATCTACATTGCTCATAAGAAATTTAAAA  
AAGCACGGAACAAGATAAAGGCAAATAATCGAATTTCCCGCGGCCGATGGCGGCCGGGAGCATGCGACGTGCGGCCCAAT  
TCGCCCTATAGTGAGTCGTATTACAATTCAGTGGCCGTCGTTTTACAACGTCGTGACTGGGAAAAACCTGGCGTTACCCA  
ACTTAATCGCCTTGCAGCACATCCCCCTTTCGCCAGCTGGCGTAATAGCGAAGAGGCCCGCACCGATCGCCCTTCCCAAC  
AGTTGCGCAGCCTGAATGGCGAATGGACGCGCCCTGTAGCGGCGCATTAAAGCGCGCGGGTGTGGTGGTTACGCGCAGCG  
TGACCGCTACACTTGCCAGCGCCCTAGCGCCGCTCCTTTCGCTTTCTCCCTTCTTCTCGCACGTTGCGCCGGCTTTTC  
CCGTCAAGCTCTAATCGGGGGGCTCCCTTTAGGATCGAATTAGTGCTTACGCMCCTCGACCCCCAAAACTGAATTRAG  
GGGGTKGATG

>S4.C3

GWTKWWRGTTWMMMATCTKGGTGCCTMAACATAAGATTGTCCACCCAGAATTGCTGGCAAGAGTCCAATTGCAAATTTG  
ACTTCTCTGGCCAAGTAAGCATGTCATTATTCTTCAAGATGGCCCATATTCTGCAAGACCAATTTGAACACAATATCC  
ACATAAAAAACAAGTTACTTCATTTGAAATTTGGCTGCACAAATTAGCTCACCATTTAATGGTGTGGTAGCACCTCAGGA  
AAATCAAATCGACTGAACTCTCCAGGCTTATTTGGCATTGCAAATATCATTGAATGCTCCTTCCACTGSMACCRATMAT  
TAWTTCYAKTTCTCCAAAMRGGTTCTGCATATTTGGGTAACCCCCAACTTARGGGGAATCAAAAATCAWGGYMMCAAGT  
TATTTGCTGCWTCATAATGWATCTAAAAAACAACAAAAAATCATCTACWTTCTGCTCATAAAAAATTTAAAAAASC  
ASGAAACAAAATAAGGMAAATAAYCRAATTTCCSCGGCCGCTWGGSGGCCGGAASCATGCRACKYCGGGCCCAATTCSC  
CCTATAKGGAGTCKAATTACAATMACGGGCCGCTKTTTTACAACKYCKGACTGGAAAAACCTYGSKTTACCCAMCTW  
AWTCGCYTKGMASMACATCCCCCTTTCGCMASCTGSKWAWTAGCRAAAAGGCCSGMACCRATCGCCCTTCCMAACAGTT  
GCGMAGCCTGAWGGCGAATGAACGCGCCCTGWAGCGGCMATTAAGCGCGCGGTGTGTGTTAMSCGACGCTGAACGCTA  
CACTGCAGSCCTACGCCGCTCTTTCGCTCTCATCTYAGCMGTGCGCTCCGTGAGYTAATCGGCTCGTAGATCGATAKCT  
ACGACCTGACCAAACTGAATA

>S4.C4

ASCMMMMMMMYYYYTTWWGAAMTTTCTCTGGCCAAGTAAGCATGTCATTATTCTTCAAGATGGCCCATATTCTGCAAGACCAATTTGAACACAATATCCACATAAAAAACAAGTTACTTCATTTGAAATTTGGCTGCACAAATTAGCTCACCATTTAATGGTGTGGTAGCACCTCAGGAAAAATCAAATCGACTGAACTCTCCAGGCTTATTTGGCATTGCAAATATCATTGAATGCTCC

TTCCACTGCAACCGATCATTAAATTCCTAGTTCTCCAAACAGGTTCTGCATATTTGGGTAAGCCCCAACTTAAGGTGGATC  
AAGAATCAATGTCACAAGTTATTTGCTGCATCATAATGTATCTTAAAAAGAAACAAGAAGAATCATCTACATTGCTC  
ATAAGAAATCAAAAAAGCACGGAACAAGATAAGGCAAATAATCGAATCCCGCGGCCGCCATGGCGGCCGGGAGCATGC  
GACGTCGGGCCCAATTCGCCCTATAGTGAGTCGATTACAATTCCTGCGCCGTCGTTTTACAACGTCGTGACTGGGAAAA  
CCCTGGCGTTACCCAATTAATCGCCTTGCAGCACATCCCCCTTCGCCAGCTGGCGTAATAGCGAAGAGGCCCGCACCG  
ATCGCCCTTCCAAACAGTTGCGCAGCCTGAATGGCGAATGGACGCGCCCTGTAGCGGCGCATTAAAGCGCGGCGGGTGTGG  
TGGTTACGCGCAGCGTGACCGCTACACTTGCCAGCGCCCTAGCGCCGCTCTTTCGCTTTCTTCCCTTCTTCTCGCCACG  
TTCGCCGGCTTCCCGTCAGCTCTAAATCGGGGGCTCCCTTAGGTTGATTARTGCTTTACGGCAMCTCGAACCCAAAAT  
GATAGGGTGAWYGTGCMGGTAGTGGGCCATCGCCTGAWGACGTTTCGCTTGACGTTGARTCMGTCTCTTAAKATG  
>S3.C5

CYKKKYSSRGGTWWWWWMCMTCTTGTGCCTCAACATAAGATTGTCCACCCAGAATTGCTGGCAAGAGTCCAATTGCAAAT  
TTGACTTTCTCTGGCCAAGTAAGCATGTCATTATTCTTCAAGATGGCCCATATTCCTGCAAGACCAATTTGAACACAATA  
TCCACATAAAAAACAAGTTACTTCATTTGAAATTTGGCTGCACAAATTAGCTCACCATTTAATGGTGCTGGTAGCACCTCA  
GGAAAATCAAATCGACTGAACTCTCCAGGCTTATTTGGCATTGCAAATATCATTGAATGCTCCTTCCACTGCAACCGATC  
ATTAATTCCTAGTTCTCCAAACAGGTTCTGCATATTTGGGTAAGCCCCAACTTAAGGTGGATCAAGAATCAATGTCACAA  
GTTATTTGCTGCATCATAATGTATCTTAAAAAGAAACAAGAAGAATCATCTACATTGCTCATAAGAAATCAAAAAA  
GCACGGAACAAGATAAGGCAAATAATCGAATCCCGCGGCCGCCATGGCGGCCGGGAGCATGCGACGTCGGGCCCAATTC  
GCCCTATAGTGAGTCGATTACAATTCCTGCGCCGTCGTTTTACAACGTCGTGACTGGGAAAACCTTGGCGTTACCCAAC  
TTAATCGCCTTGCAGCACATCCCCCTTCGCCAGCTGGCGTAATAGCGAAGAGGCCCGCACCGATCGCCCTTCCAAACAG  
TTGCGCAGCCTGAATGGCGAATGGACGCGCCCTGTAGCGGCGCATTAAAGCGCGGCGGGTGTGGTGGTTACGCGCAGCGTG  
ACCGCTACACTTGCCAGCGCCCTAGCGCCGCTCCTTCGCTTTCTTCCCTTCTTCTCGCCACGTTCCGGGCTTCCCG  
TCAAGCTCTAAATCGGGGGGGCTCCCTTAGGGTTCGATTAGTGCTTTACGCACTCGACCAAACCTTGAATTAAGGGCGT  
GAAKWGGCTGATA

>S3.C6

GRMMRYMMTAAMACTACRACCTKCRTWMMMTCTTGTGCCTCACATAAGATTGTCCACCCRGAATTGCTGGCAAGAGTCCA  
ATTGCAAATTTGACTTTCTCTGGCCAAGTAAGCATGTCATTATTCTTCAAGATGGCCCATATTCCTGCAAGACCAATTTG  
AACACAATATCCACATAAAAAACAAGTTACTTCATTTGAAATTTGGCTGCACAAATTAGCTCACCATTTAATGGTGCTGGT  
AGCACCTCAGGAAAATCAAATCGACTGAACTCTCCAGGCTTATTTGGCATTGCAAATATCATTGAATGCTCCTTCCACTG  
CAACCGATCATTAAATTCCTAGTTCTCCAAACAGGTTCTGCATATTTGGGTAAGCCCCAACTTAAGGTGGATCAAGAATCA  
ATGTCACAAGTTATTTGCTGCATCATAATGTATCTTAAAAAGAAACAAGAAGAATCATCTACATTGCTCATAAGAAA  
TTCAAAAAAGCACGGAACAAGATAAGGCAAATAATCGAATCCCGCGGCCGCCATGGCGGCCGGGAGCATGCGACGTCGG  
GCCAATTCGCCCTATAGTGAGTCGATTACAATTCCTGCGCCGTCGTTTTACAACGTCGTGACTGGGAAAACCTTGGCG  
TTACCCAATTAATCGCCTTGCAGCACATCCCCCTTCGCCAGCTGGCGTAATAGCGAAGAGGCCCGCACCGATCGCCCT  
TCCCAACAGTTGCGCAGCCTGAATGGCGAATGGACGCGCCCTGTAGCGGCGCATTAAAGCGCGGCGGGTGTGGTGGTTACG  
CGCAGCGTGACCGTACACTTGCCAGCGCCCTAGCGCCGCTCCTTTCGCTTTCTTCCCTTCTTCTCGCCACGTTCCGC  
CGGCTTCCCGTCAAGCTCTAATCGGGGGGGCTCCCTTTAGGATCCGAATATGCCTTACGCACTCGGACCCCCAGAGC  
AA

>S4.C5

GKKWMRGWWWCCMTCTTGTGCCTCAACATAAGATTGTCCACCCAGAATTGCTGGCAAGAGTCCAATTGCAAATTTGACTT  
TCTCTGGCCAAGTAAGCATGTCATTATTCTTCAAGATGGCCCATATTCCTGCAAGACCAATTTGAACACAATATCCACAT  
AAAAACAAGTTACTTCATTTGAAATTTGGCTGCACAAATTAGCTCACCATTTAATGGTGCTGGTAGCATCTCAGGAAAAAT  
CAAATCGACTGAACTCTCCAGGCTTATTTGGCATTGCAAATATCATTGAATGCTCCTTCCACTGGCAACCGATCATTAAAT  
TCCTAGTTCTCCAAACAGGTTCTGCATATTTGGGTAAGCCCCAACTTAAGGTGGATCAAGAATCAATGTCACAAGTTATT  
TGCTGCATCATAATGTATCTTAAAAAGAAACAAGAAGAATCATCTACATTGCTCATAAGAAATCAAAAAAGCACGG  
ACAAGATAAGGCAAATAATCGAATCCCGCGGCCGCCATGGCGGCCGGGAGCATGCGACGTCGGGCCCAATTCGCCCTA  
TAGTGAGTCGTATTACAATTCCTGCGCCGTCGTTTTACAACGTCGTGACTGGGAAAACCTTGGCGTTACCCAATTAATC  
GCCTTGCAGCACATCCCCCTTCGCCAGCTGGCGTAATAGCGAAGAGGCCCGCACCGATCGCCCTTCCAAACAGTTGCGC  
AGCCTGAATGGCGAATGGACGCGCCCTGTAGCGGCGCATTAAAGCGCGGCGGGTGTGGTGGTTACGCGCAGCGTGACCGCT  
ACACTTGCCAGCGCCCTAGCGCCGCTCCTTTCGCTTTCTTCCCTTCTTCTCGCCACGTTCCGGGCTTCCCGTCAAG  
CTCTAATCGGGGGCTCCGTTAGGATTCGAATTAGTGCTTTACGCCACCCTCGCACCCAAAAAACYYTKGAACWG

>S4.C6

CRMMMAMSMMMKMMKMMAMMCCMSCARAYKCGTWMCMTCTTGTGCCTCACATAAGATTGTCCACCCAGAATTGCTGG  
C  
AAGAGTCCAATTGCAAATTTGACTTTCTCTGGCCAAGTAAGCATGTCATTATTCTTCAAGATGGCCCATATTCCTGCAAG  
ACCAATTTGAACACAATATCCACATAAAAAACAAGTTACTTCATTTGAAATTTGGCTGCACAAATTAGCTCACCATTTAAT  
GGTGCTGGTAGCACCTCAGGAAAATCAAATCGACTGAACTCTCCAGGCTTATTTGGCATTGCAAATATCATTGAATGCTC  
CTTCCACTGGMAACCGATMWTAWTTCCTAKTTCTCCAAACRGGTTCTGCWTATTKGGGWAASCCCMCTWARGGGGGA

TCARRAATMAWGGTCMCARGTTATTTGCTGCATCATAATGTATCTAAAAAAAAAACAATAATCWTCTACATTCWTGC  
TCATAAAAAATTCAAAAAASCMCGGAACAAAATAAGGMAAATAAYCRAATTCSCGCGCCAGGGSGGCCGGAASCAT  
GCAACKYCGGGCCAATTCSCCTATAKKGAGTCKAATTACAATTCACGGGCCGYCKTTTTACAACGYCKKGACTGGAAA  
AACCTGSSKTTACCCAACCTAATCSCCTTGMSMACATCCCCCTTCGCCAGYTGSKWAAWASCAAAAAGGCCSMAC  
CGWTCGCCCTTCMAACAGTKSCGAGCCKGAAKGGCRAAKGRACGCGCCYTGWASCGSCSMATTARSSGCGCCGGKTGT  
GGTGGTW/MCGCGCAGSCGTGACCGYWAMCACTTGCCARSCGCCCTAAGCGCCCGCYCTTTCCGCTTTYTTCCCTTCC  
TTTCTCGCCACGTTCCCGGGCTTTCCCGGTCAAGCTCTAGATCCGGGACTCTTTAAGGTCCCGAATTTAGKGCTTTAAC  
SGSGCAC
